# Supplementary material for: A Λ-Ir(iii)-phenylquinazolinone complex enhances ferroptosis by selectively inhibiting metallothionein-1
Source: Royal Society of Chemistry journal article supplement (doi:10.1039/d4sc00422a), 2024-01-01
Supplement: d4sc00422a1.xlsx [file d4sc00422a1.xlsx]

## Sheet: Δ-IrPPQ-vs-Λ-IrPPQ 
Accession	Gene Name	FoldChange	Regulation	p-value
P00747	PLG	0.539087	Down	3.27699e-05
Q6NWY9	PRPF40B	0.664351	Down	0.0254546
O95905	ECD	0.685174	Down	0.00117704
P02749	APOH	0.710275	Down	0.00268886
Q9NZP5	OR5AC2	0.713115	Down	0.00259461
P02042	HBD	0.717586	Down	0.000488837
Q9H0F7	ARL6	0.717735	Down	7.73959e-05
Q5BKU9	OXLD1	0.72426	Down	1.80232e-06
Q9NUA8	ZBTB40	0.72886	Down	0.000218044
P37268	FDFT1	0.730436	Down	9.50828e-06
Q9NXG0	CNTLN	0.733943	Down	0.0223431
P04004	VTN	0.746113	Down	0.00139982
P16401	H1-5	0.753775	Down	0.0366506
P62304	SNRPE	0.754056	Down	0.035197
P02774	GC	0.765232	Down	0.000927686
Q0VG06	FAAP100	0.768331	Down	0.0174181
P13747	HLA-E	0.772211	Down	0.0198494
O43303	CCP110	0.781532	Down	0.0136276
P98160	HSPG2	0.785173	Down	0.000777035
P39060	COL18A1	0.795509	Down	0.000953124
P31431	SDC4	0.798411	Down	3.81548e-05
Q86YA3	ZGRF1	0.798725	Down	0.00834632
P00734	F2	0.801964	Down	0.00938674
Q8WXE9	STON2	0.802341	Down	0.0116303
Q13188	STK3	0.80681	Down	0.00478395
Q16514	TAF12	0.808414	Down	0.00681383
P48307	TFPI2	0.815268	Down	0.011107
O00622	CCN1	0.815285	Down	0.00374719
O75558	STX11	0.815766	Down	0.00326584
P01033	TIMP1	0.817815	Down	0.00394982
P23142	FBLN1	0.829806	Down	0.0274978
O76061	STC2	0.830645	Down	0.0184428
Q9Y4E5	ZNF451	1.2385	Up	0.0401464
O94811	TPPP	1.2485	Up	0.0192036
Q96NZ8	WFIKKN1	1.25376	Up	0.0371152
P80297	MT1X	1.25523	Up	0.00244998
Q9Y478	PRKAB1	1.25548	Up	0.0346434
Q7LC44	ARC	1.37112	Up	0.0464338

## Sheet: Δ-IrPPQ-vs-PBS
Accession	Gene Name	FoldChange	Regulation	p-value
Q9NUA8	ZBTB40	0.110346	Down	2.43687e-05
Q9NXG0	CNTLN	0.233757	Down	7.2078e-05
Q8TBZ2	MYCBPAP	0.236724	Down	1.618e-05
Q9H2J7	SLC6A15	0.251319	Down	6.49166e-06
P0C221	CCDC175	0.25638	Down	6.67732e-05
Q16667	CDKN3	0.271644	Down	4.4498e-05
Q499Z3	SLFNL1	0.272468	Down	1.10182e-06
Q9NRM7	LATS2	0.288608	Down	0.000188824
Q7Z5H4	VN1R5	0.298043	Down	0.000354057
O43303	CCP110	0.299864	Down	4.83699e-05
Q96I76	GPATCH3	0.327362	Down	0.00209541
Q68DK7	MSL1	0.363407	Down	4.92497e-06
Q6ZR37	PLEKHG7	0.409522	Down	2.78703e-05
Q06609	RAD51	0.411229	Down	5.97181e-06
O60662	KLHL41	0.423144	Down	1.00564e-05
Q8WXE9	STON2	0.428433	Down	0.000105261
Q9NZP5	OR5AC2	0.437941	Down	0.00010268
Q96P20	NLRP3	0.450203	Down	0.000314961
P06132	UROD	0.454904	Down	6.20115e-07
P34913	EPHX2	0.459545	Down	0.000108097
P02795	MT2A	0.460964	Down	0.00584991
Q6EEV4	POLR2M	0.470312	Down	0.00575981
Q9BS18	ANAPC13	0.472886	Down	0.000532153
P17707	AMD1	0.474281	Down	0.00019059
Q5VZK9	CARMIL1	0.495628	Down	0.000118451
O95273	CCNDBP1	0.503886	Down	0.000111773
Q96A05	ATP6V1E2	0.504106	Down	0.000263052
P07197	NEFM	0.504128	Down	0.00031403
Q5VST9	OBSCN	0.504381	Down	4.41656e-05
Q09328	MGAT5	0.521173	Down	0.000264836
P61024	CKS1B	0.52657	Down	6.77209e-05
P00374	DHFR	0.532154	Down	4.49949e-06
Q9HCU9	BRMS1	0.534774	Down	2.86989e-05
P02647	APOA1	0.54034	Down	0.00180776
O00189	AP4M1	0.545767	Down	8.82437e-06
Q9NUQ2	AGPAT5	0.553982	Down	5.73884e-06
P50579	METAP2	0.557144	Down	4.2594e-09
Q5M9Q1	NKAPL	0.557501	Down	0.0327211
Q86YA3	ZGRF1	0.560359	Down	0.000289725
Q9Y663	HS3ST3A1	0.562268	Down	0.00748127
Q14135	VGLL4	0.563409	Down	0.00490455
Q9NQH7	XPNPEP3	0.572355	Down	5.12707e-06
Q9NZJ6	COQ3	0.574519	Down	0.00153479
Q96RR1	TWNK	0.583451	Down	0.000996401
Q9BTE6	AARSD1	0.589696	Down	5.61481e-07
Q8IWB9	TEX2	0.594343	Down	0.000293803
O14907	TAX1BP3	0.596157	Down	7.51779e-05
Q9Y239	NOD1	0.59732	Down	5.96898e-06
Q9H0F7	ARL6	0.606625	Down	0.000424073
P0C2W1	FBXO45	0.608784	Down	0.000511088
P49588	AARS1	0.610408	Down	2.54389e-06
Q9GZP8	IMUP	0.611713	Down	7.75428e-05
Q9BV57	ADI1	0.612498	Down	8.45639e-07
P51797	CLCN6	0.612852	Down	0.000254774
Q9Y316	MEMO1	0.615549	Down	0.000352833
Q9NRN9	METTL5	0.618864	Down	2.17527e-05
Q96NZ8	WFIKKN1	0.620241	Down	0.0085926
Q96PM5	RCHY1	0.621515	Down	0.0424587
P80297	MT1X	0.621693	Down	0.0219676
P08243	ASNS	0.622643	Down	1.58939e-06
Q8WUA8	TSKU	0.622885	Down	0.00922543
Q8TDY2	RB1CC1	0.623789	Down	7.61653e-05
Q9NYT0	PLEK2	0.623801	Down	2.07279e-05
Q86UY6	NAA40	0.624183	Down	0.000305274
Q8TCA0	LRRC20	0.624958	Down	1.26145e-05
Q96BI1	SLC22A18	0.626768	Down	9.50828e-05
P27986	PIK3R1	0.626897	Down	0.0211094
Q8IYB5	SMAP1	0.630295	Down	1.60704e-05
P02649	APOE	0.630604	Down	1.02941e-05
Q9H900	ZWILCH	0.632032	Down	0.000378114
Q9NT62	ATG3	0.6333	Down	8.97097e-07
P54687	BCAT1	0.634518	Down	1.55192e-05
Q8WUH1	CHURC1	0.63537	Down	1.42679e-05
Q58FF6	HSP90AB4P	0.636186	Down	0.00630251
Q14019	COTL1	0.636521	Down	6.06366e-05
O43847	NRDC	0.640316	Down	1.04124e-05
Q15036	SNX17	0.641331	Down	4.78421e-06
Q9HBG6	IFT122	0.643177	Down	0.00171304
Q9NWQ9	C14orf119	0.64348	Down	0.000312858
O95749	GGPS1	0.643685	Down	0.00258479
Q96KB5	PBK	0.647267	Down	3.71029e-05
Q9UPR0	PLCL2	0.649082	Down	3.87794e-05
Q92540	SMG7	0.650079	Down	0.00012771
Q7Z4H3	HDDC2	0.65147	Down	0.000393051
Q9NPD8	UBE2T	0.651494	Down	0.000176174
Q96F85	CNRIP1	0.6517	Down	3.72863e-05
Q99952	PTPN18	0.652607	Down	0.0012074
Q8IVM0	CCDC50	0.65302	Down	2.49918e-07
P53611	RABGGTB	0.653048	Down	6.23821e-05
Q9BZX2	UCK2	0.653241	Down	7.19649e-06
Q9Y217	MTMR6	0.65333	Down	0.000931864
Q9H2P9	DPH5	0.65435	Down	5.65317e-05
P33552	CKS2	0.655391	Down	5.65428e-05
O00762	UBE2C	0.656045	Down	3.00277e-05
P13693	TPT1	0.656489	Down	9.98412e-06
Q8NB16	MLKL	0.657602	Down	4.68814e-06
P68104	EEF1A1	0.659531	Down	1.33096e-05
Q9Y303	AMDHD2	0.659792	Down	5.53371e-05
Q9NX52	RHBDL2	0.660131	Down	0.00143922
Q8IUQ4	SIAH1	0.660213	Down	0.00171251
Q9H3K6	BOLA2B	0.660984	Down	0.000162328
O94952	FBXO21	0.661338	Down	7.62424e-05
Q15004	PCLAF	0.662144	Down	0.000464454
Q13765	NACA	0.662554	Down	3.52125e-05
Q15785	TOMM34	0.663225	Down	7.1511e-05
Q8WUX2	CHAC2	0.663429	Down	0.000244516
Q969E8	TSR2	0.663447	Down	0.000465777
Q53GA4	PHLDA2	0.663556	Down	0.00586042
P35754	GLRX	0.6637	Down	0.000589243
P49591	SARS1	0.663906	Down	9.3921e-06
P02765	AHSG	0.664145	Down	0.00948297
O96033	MOCS2	0.664539	Down	0.00339759
P06331	IGHV4-34	0.664928	Down	0.000515413
P21291	CSRP1	0.665747	Down	6.8053e-06
P41567	EIF1	0.665993	Down	0.000380142
Q96D46	NMD3	0.666346	Down	2.7951e-05
Q8TCG1	CIP2A	0.666877	Down	3.7984e-07
Q16831	UPP1	0.667116	Down	0.000160268
Q6NWY9	PRPF40B	0.667167	Down	0.0216831
O15484	CAPN5	0.667457	Down	3.44799e-05
Q9H5X1	CIAO2A	0.667537	Down	7.10023e-05
P23409	MYF6	0.6676	Down	5.92307e-05
Q96LD8	SENP8	0.667699	Down	3.45429e-05
Q9P021	CRIPT	0.668621	Down	0.000187597
P62993	GRB2	0.669321	Down	4.32345e-05
P0C7T5	ATXN1L	0.669788	Down	8.0706e-05
Q15645	TRIP13	0.669997	Down	4.02051e-05
Q9Y3D8	AK6	0.670796	Down	0.000279952
Q14847	LASP1	0.670874	Down	3.18549e-05
P50876	RNF144A	0.671553	Down	0.000316019
Q96BD8	SKA1	0.672287	Down	0.00163428
P12429	ANXA3	0.673919	Down	1.80182e-05
O00625	PIR	0.674603	Down	3.12912e-05
Q9UI30	TRMT112	0.675245	Down	4.13266e-06
P50461	CSRP3	0.676001	Down	0.000772781
Q86T82	USP37	0.676118	Down	0.00190225
Q99615	DNAJC7	0.676588	Down	6.96326e-06
Q9H773	DCTPP1	0.676674	Down	1.69605e-05
P49773	HINT1	0.677161	Down	7.96894e-06
P55209	NAP1L1	0.677204	Down	0.000315161
Q9UK76	JPT1	0.677516	Down	7.8105e-06
Q9BV44	THUMPD3	0.677738	Down	1.03045e-06
Q86X83	COMMD2	0.677765	Down	0.000394669
Q9P2Q2	FRMD4A	0.677804	Down	0.000427475
P49642	PRIM1	0.678467	Down	3.8361e-06
Q9H1Y0	ATG5	0.678686	Down	4.81656e-05
Q9NYI0	PSD3	0.679907	Down	0.0335327
Q9BZQ8	NIBAN1	0.679918	Down	0.000192854
P14921	ETS1	0.680701	Down	0.00236175
Q8IX90	SKA3	0.68084	Down	0.000783939
Q8N0X7	SPART	0.681064	Down	4.33858e-06
Q9H0J9	PARP12	0.681189	Down	0.000103234
P36969	GPX4	0.681842	Down	2.17036e-05
Q9H788	SH2D4A	0.681849	Down	3.40033e-05
Q96IK1	BOD1	0.681849	Down	0.00228676
Q9BPZ3	PAIP2	0.681864	Down	0.000489383
O96007	MOCS2	0.681942	Down	0.000167208
P51965	UBE2E1	0.682448	Down	0.000318486
Q9H2H9	SLC38A1	0.682593	Down	0.000165287
Q6P5R6	RPL22L1	0.683161	Down	0.000112569
Q9BW83	IFT27	0.683516	Down	0.000381226
Q8TEL6	TRPC4AP	0.684032	Down	7.95918e-05
P04439	HLA-A	0.684127	Down	0.000595639
Q8TCF1	ZFAND1	0.684149	Down	1.44696e-05
Q9NZD8	SPG21	0.684252	Down	0.000279107
Q14644	RASA3	0.684606	Down	7.295e-05
Q9NUP9	LIN7C	0.684633	Down	4.09133e-05
Q9GZN8	C20orf27	0.684864	Down	0.00269515
Q8N999	C12orf29	0.684896	Down	0.000830472
Q9Y2S6	TMA7	0.6851	Down	0.000186752
Q8IYA2	CCDC144CP	0.686525	Down	0.000243376
O43542	XRCC3	0.686688	Down	0.000726314
P49427	CDC34	0.687055	Down	5.67757e-05
P13639	EEF2	0.687158	Down	1.31248e-06
Q6P4I2	WDR73	0.687261	Down	0.000228594
P62495	ETF1	0.688343	Down	2.62521e-05
P31350	RRM2	0.688723	Down	1.06028e-05
Q6P9B6	MEAK7	0.689937	Down	0.000251372
Q9BRA2	TXNDC17	0.690114	Down	0.000225378
O43310	CTIF	0.690601	Down	0.000215018
P07737	PFN1	0.690784	Down	7.40953e-05
Q9Y617	PSAT1	0.690861	Down	2.11996e-08
Q8TD26	CHD6	0.691653	Down	0.000246434
Q16222	UAP1	0.691778	Down	1.4562e-06
Q9BZL1	UBL5	0.69227	Down	9.43011e-05
P49247	RPIA	0.692609	Down	0.0262826
P04818	TYMS	0.692676	Down	7.04177e-05
P0C7P3	SLFN14	0.693222	Down	3.64557e-05
O14530	TXNDC9	0.693541	Down	5.44771e-05
Q9NWT6	HIF1AN	0.694527	Down	7.62437e-05
Q969G6	RFK	0.694982	Down	2.52359e-05
O75347	TBCA	0.695039	Down	6.7863e-05
Q9H4H8	FAM83D	0.695218	Down	0.000291888
Q9BY32	ITPA	0.695435	Down	0.000467859
Q96C90	PPP1R14B	0.695497	Down	0.000881884
P43487	RANBP1	0.696507	Down	1.21829e-05
P04080	CSTB	0.696995	Down	0.000189325
P26639	TARS1	0.697423	Down	1.65688e-05
O94804	STK10	0.697551	Down	1.1977e-07
Q9Y3C8	UFC1	0.697668	Down	0.000172556
P46734	MAP2K3	0.69788	Down	2.51594e-06
O75534	CSDE1	0.697957	Down	4.78692e-06
P19623	SRM	0.698002	Down	8.83829e-05
Q9NR12	PDLIM7	0.69836	Down	1.11361e-05
P22102	GART	0.698504	Down	2.40782e-05
Q13951	CBFB	0.698572	Down	5.32533e-06
P50452	SERPINB8	0.699032	Down	0.000165306
P46926	GNPDA1	0.699124	Down	6.20574e-05
Q14247	CTTN	0.699927	Down	9.36034e-07
A5D8V6	VPS37C	0.700256	Down	0.0356725
Q9Y6T7	DGKB	0.700351	Down	0.00177868
P20290	BTF3	0.70073	Down	6.61846e-06
O95989	NUDT3	0.701123	Down	5.93134e-05
P60842	EIF4A1	0.701446	Down	4.23554e-05
P30613	PKLR	0.701836	Down	0.0285466
Q9UK97	FBXO9	0.701953	Down	0.000742457
Q9NRM2	ZNF277	0.702407	Down	0.0013469
Q96PU5	NEDD4L	0.702484	Down	0.000650005
P46776	RPL27A	0.702864	Down	0.00770833
Q9H8M7	MINDY3	0.703258	Down	0.000121891
P31751	AKT2	0.703792	Down	0.00023091
Q13489	BIRC3	0.703793	Down	0.00100509
Q8IVH8	MAP4K3	0.703816	Down	0.000687946
Q9NPH0	ACP6	0.703816	Down	0.000687946
P04733	MT1F	0.703948	Down	0.0139728
Q96KP4	CNDP2	0.704081	Down	5.69436e-07
P58546	MTPN	0.704356	Down	0.000375118
P63241	EIF5A	0.704507	Down	0.000148419
Q99961	SH3GL1	0.70483	Down	1.1351e-05
Q01995	TAGLN	0.704862	Down	0.000441758
Q3KRA6	C2orf76	0.705001	Down	0.000427572
Q6ZWJ1	STXBP4	0.705028	Down	0.000120779
P36639	NUDT1	0.705302	Down	1.06119e-05
O75822	EIF3J	0.705532	Down	8.71483e-06
Q96GQ5	RUSF1	0.70571	Down	1.88891e-06
O95801	TTC4	0.706179	Down	1.6396e-05
O60869	EDF1	0.706284	Down	0.000250747
Q13115	DUSP4	0.706762	Down	0.0008365
O75794	CDC123	0.707019	Down	1.26637e-06
Q9NRN7	AASDHPPT	0.707115	Down	6.68657e-05
Q9NX55	HYPK	0.707605	Down	0.000137293
Q13257	MAD2L1	0.707643	Down	0.000610262
P46934	NEDD4	0.707779	Down	2.79769e-06
Q15382	RHEB	0.707986	Down	2.00557e-05
Q9BT23	LIMD2	0.708071	Down	0.0029374
Q7L1Q6	BZW1	0.708395	Down	2.25097e-05
Q969T4	UBE2E3	0.708443	Down	0.000151711
Q15796	SMAD2	0.70872	Down	0.00213045
Q53FT3	HIKESHI	0.708793	Down	0.000357948
P56945	BCAR1	0.70881	Down	8.64687e-06
Q13158	FADD	0.708995	Down	0.000509069
P62857	RPS28	0.709658	Down	0.000711346
Q8WVK7	SKA2	0.710236	Down	1.93518e-05
O60493	SNX3	0.710778	Down	4.41204e-06
Q9H8M2	BRD9	0.710978	Down	0.0300012
P51692	STAT5B	0.712252	Down	0.000183696
Q9BUK6	MSTO1	0.712815	Down	8.40638e-05
Q86VX2	COMMD7	0.713789	Down	0.000139214
P26641	EEF1G	0.713915	Down	1.82242e-06
P30041	PRDX6	0.713934	Down	0.00788704
O60678	PRMT3	0.714489	Down	1.87967e-05
P17174	GOT1	0.714695	Down	3.32689e-06
Q9UJ68	MSRA	0.714756	Down	0.000108599
P11802	CDK4	0.714836	Down	0.0003289
Q8N9N8	EIF1AD	0.715065	Down	2.66741e-05
Q9HB07	MYG1	0.715283	Down	4.31146e-05
Q7L2H7	EIF3M	0.715311	Down	0.000308162
Q6P1L5	FAM117B	0.715358	Down	0.00750845
Q96AT9	RPE	0.715543	Down	0.00121324
P50502	ST13	0.715943	Down	9.46053e-06
Q0VDG4	SCRN3	0.716006	Down	0.00121675
Q13630	GFUS	0.71611	Down	2.1433e-05
O00299	CLIC1	0.716286	Down	0.000120366
P24534	EEF1B2	0.716449	Down	1.55761e-05
P41227	NAA10	0.716555	Down	7.54138e-06
P60983	GMFB	0.71656	Down	0.000129146
P52565	ARHGDIA	0.716575	Down	9.60382e-05
P14735	IDE	0.716631	Down	1.22854e-05
Q9BVV6	KIAA0586	0.716807	Down	8.42135e-05
Q9BU89	DOHH	0.71781	Down	2.6373e-05
Q8WTS6	SETD7	0.717886	Down	0.00014284
Q8IUW3	SPATA2L	0.718078	Down	0.00295141
Q9Y3A5	SBDS	0.718135	Down	2.87542e-05
O00410	IPO5	0.718299	Down	1.12527e-05
Q8N9F7	GDPD1	0.7184	Down	0.00437972
A6NHL2	TUBAL3	0.718495	Down	0.00140393
Q03113	GNA12	0.718505	Down	0.000167816
Q9H0R4	HDHD2	0.719001	Down	0.000119134
Q9HC98	NEK6	0.719066	Down	0.00145842
Q01970	PLCB3	0.719688	Down	2.97067e-06
Q14493	SLBP	0.719796	Down	0.000638414
Q99439	CNN2	0.720307	Down	4.65667e-05
Q8TB24	RIN3	0.720443	Down	0.000402786
Q8TEA7	TBCK	0.720728	Down	0.0065255
P16949	STMN1	0.720901	Down	9.73689e-05
Q9NQW7	XPNPEP1	0.721268	Down	1.00401e-06
P50395	GDI2	0.721513	Down	1.71058e-05
Q9UHB4	NDOR1	0.721609	Down	0.0394353
Q9UHY7	ENOPH1	0.721691	Down	1.25551e-05
P32119	PRDX2	0.722365	Down	0.00559614
P54577	YARS1	0.722547	Down	1.6548e-05
Q12894	IFRD2	0.723835	Down	0.000972806
P61960	UFM1	0.723996	Down	0.00030509
Q53H82	LACTB2	0.724146	Down	0.000663851
Q16512	PKN1	0.724161	Down	3.82233e-06
Q719H9	KCTD1	0.724901	Down	0.00304042
Q96R06	SPAG5	0.725039	Down	8.2332e-05
Q9Y237	PIN4	0.725044	Down	6.75857e-06
Q96EF6	FBXO17	0.725055	Down	0.000340423
Q9Y266	NUDC	0.725126	Down	6.55791e-05
P35790	CHKA	0.725233	Down	0.00432709
Q71U36	TUBA1A	0.725404	Down	0.000335817
O75153	CLUH	0.725518	Down	3.85656e-06
Q9NSP4	CENPM	0.725602	Down	0.00141143
Q86VN1	VPS36	0.725632	Down	0.000111601
Q9UHD1	CHORDC1	0.725723	Down	0.000249662
Q92747	ARPC1A	0.725746	Down	0.0183588
Q99622	C12orf57	0.726214	Down	0.00076474
P62633	CNBP	0.726575	Down	0.000338082
Q6ZT21	TMPPE	0.726817	Down	0.00910749
Q9BQE3	TUBA1C	0.726951	Down	2.8181e-05
O14817	TSPAN4	0.726969	Down	0.000618485
Q9BT67	NDFIP1	0.726986	Down	2.01755e-05
Q9HBX8	LGR6	0.727005	Down	0.00169208
Q9GZZ1	NAA50	0.727043	Down	1.27551e-05
Q8TB52	FBXO30	0.727142	Down	0.000595832
P35520	CBS	0.727245	Down	5.57775e-05
Q13613	MTMR1	0.727726	Down	0.00296823
Q13671	RIN1	0.727852	Down	0.000134236
O60271	SPAG9	0.728234	Down	2.05814e-06
Q96P70	IPO9	0.728469	Down	1.28279e-05
Q7L9L4	MOB1B	0.72854	Down	6.69734e-06
Q9NXN4	GDAP2	0.728601	Down	0.00108636
Q9H6D7	HAUS4	0.728673	Down	0.00010395
Q9P0P0	RNF181	0.728767	Down	0.000838965
P61221	ABCE1	0.728784	Down	3.35025e-05
P61457	PCBD1	0.728868	Down	0.00769115
Q96HC4	PDLIM5	0.728909	Down	3.26315e-06
P52306	RAP1GDS1	0.729318	Down	2.75111e-05
P35219	CA8	0.729328	Down	0.000362278
Q8TER5	ARHGEF40	0.729586	Down	0.00157137
Q14651	PLS1	0.730139	Down	5.23568e-05
Q6ZNJ1	NBEAL2	0.730195	Down	0.00153977
Q9Y4C2	TCAF1	0.730237	Down	0.000345521
Q8TDJ6	DMXL2	0.730254	Down	0.000260763
Q12933	TRAF2	0.730352	Down	0.000141108
Q8TC05	MDM1	0.730527	Down	0.00129171
O75223	GGCT	0.730865	Down	0.000141957
Q96QG7	MTMR9	0.731037	Down	8.69001e-06
Q9Y244	POMP	0.731182	Down	0.000330367
Q6NXE6	ARMC6	0.731657	Down	2.44645e-05
P23588	EIF4B	0.731762	Down	6.24128e-05
P29692	EEF1D	0.731767	Down	1.17312e-05
Q99871	HAUS7	0.731796	Down	0.000637083
P35268	RPL22	0.731806	Down	0.00063021
P23528	CFL1	0.732099	Down	6.08829e-05
O95905	ECD	0.732205	Down	0.00515173
O14602	EIF1AY	0.732278	Down	0.000147391
O00571	DDX3X	0.732393	Down	0.000565574
Q16763	UBE2S	0.732488	Down	2.02843e-05
P60866	RPS20	0.732982	Down	0.000813538
Q9H8K7	PAAT	0.733279	Down	0.000537445
Q9NZJ9	NUDT4	0.733448	Down	2.94178e-06
O60234	GMFG	0.733516	Down	0.000622145
Q5VW36	FOCAD	0.733577	Down	0.000276714
Q15012	LAPTM4A	0.733587	Down	0.00031526
P13797	PLS3	0.733965	Down	5.48254e-06
Q15942	ZYX	0.734031	Down	8.42815e-05
P22392	NME2	0.734301	Down	4.23985e-05
Q9NTK5	OLA1	0.734325	Down	7.57272e-06
Q99447	PCYT2	0.734426	Down	8.73318e-05
Q96GA3	LTV1	0.734508	Down	4.36298e-05
Q9Y281	CFL2	0.73455	Down	0.000121089
P12081	HARS1	0.73508	Down	1.62249e-05
O95819	MAP4K4	0.735442	Down	6.47631e-05
Q96H20	SNF8	0.735547	Down	0.00023485
P25398	RPS12	0.73559	Down	9.86154e-05
P62851	RPS25	0.736013	Down	5.34139e-05
P41240	CSK	0.736156	Down	3.72017e-06
P62256	UBE2H	0.736578	Down	7.44824e-06
P63146	UBE2B	0.736838	Down	0.00389351
Q9HB71	CACYBP	0.737014	Down	8.44712e-06
P05386	RPLP1	0.737133	Down	0.0021744
O00764	PDXK	0.737267	Down	7.66874e-05
P30520	ADSS2	0.737521	Down	1.78609e-06
Q7Z7E8	UBE2Q1	0.737618	Down	5.94757e-05
P11172	UMPS	0.737733	Down	2.50652e-05
Q14185	DOCK1	0.737966	Down	0.0020244
Q13325	IFIT5	0.738028	Down	0.000665408
Q9BZE2	PUS3	0.738198	Down	0.00170271
Q66K14	TBC1D9B	0.738212	Down	0.000196471
P68366	TUBA4A	0.738319	Down	0.00249808
P62253	UBE2G1	0.738324	Down	0.000210057
Q9NX46	ADPRS	0.738548	Down	1.74093e-05
P23921	RRM1	0.739009	Down	3.82227e-06
Q9BPY3	FAM118B	0.739164	Down	0.00881866
O95684	CEP43	0.73961	Down	4.80527e-06
Q13526	PIN1	0.73967	Down	0.000120386
Q9Y262	EIF3L	0.739875	Down	7.9477e-06
Q96LR5	UBE2E2	0.739945	Down	7.10218e-06
Q96SZ5	ADO	0.740097	Down	0.000327309
Q15126	PMVK	0.740119	Down	5.28368e-06
P84101	SERF2	0.740138	Down	0.0026873
Q92609	TBC1D5	0.740186	Down	8.08313e-05
Q92882	OSTF1	0.740213	Down	0.0107271
Q9Y285	FARSA	0.74026	Down	6.63396e-06
Q8TEX9	IPO4	0.740345	Down	0.000543406
P62081	RPS7	0.740556	Down	0.000241626
P10586	PTPRF	0.740701	Down	0.00338351
Q6YHU6	THADA	0.740797	Down	2.29899e-05
O60610	DIAPH1	0.74086	Down	7.61995e-06
Q14790	CASP8	0.740937	Down	7.96415e-05
P30085	CMPK1	0.741103	Down	2.70428e-05
P63313	TMSB10	0.741132	Down	0.000172259
Q16658	FSCN1	0.741153	Down	1.69716e-07
P63244	RACK1	0.741278	Down	8.09622e-05
Q9P000	COMMD9	0.741278	Down	0.00422242
Q9BTY7	HGH1	0.741316	Down	0.000171003
P60981	DSTN	0.74148	Down	0.000335206
Q9BQL6	FERMT1	0.741722	Down	0.000300773
P83881	RPL36A	0.741801	Down	0.00137714
Q00169	PITPNA	0.741938	Down	1.0535e-06
P10599	TXN	0.741984	Down	0.000891575
Q92539	LPIN2	0.742173	Down	0.0103537
P07951	TPM2	0.742294	Down	3.97411e-05
Q9Y5X2	SNX8	0.74272	Down	0.000262837
Q96EI5	TCEAL4	0.742778	Down	0.000254761
Q9H2K8	TAOK3	0.74279	Down	0.00619853
Q96BY6	DOCK10	0.742907	Down	5.87297e-06
P08865	RPSA	0.743056	Down	3.72851e-05
P06493	CDK1	0.743285	Down	3.4596e-06
P49593	PPM1F	0.743422	Down	0.00174897
Q96AC1	FERMT2	0.74348	Down	1.42713e-06
Q9NRD5	PICK1	0.743492	Down	0.00311208
O15078	CEP290	0.74352	Down	0.00199978
Q14258	TRIM25	0.743779	Down	2.42484e-06
Q16566	CAMK4	0.744206	Down	0.000478886
Q92619	ARHGAP45	0.744582	Down	0.00897692
P62861	FAU	0.744658	Down	0.00450021
O60294	LCMT2	0.744796	Down	0.00310049
O95433	AHSA1	0.744811	Down	1.1993e-05
P51617	IRAK1	0.744904	Down	0.0028053
Q9BUF5	TUBB6	0.744908	Down	4.44538e-05
P68036	UBE2L3	0.745769	Down	6.88596e-05
P60228	EIF3E	0.74597	Down	1.36769e-05
O00244	ATOX1	0.746118	Down	1.46378e-05
Q8N0T1	RBIS	0.746224	Down	0.000245444
Q96K17	BTF3L4	0.746334	Down	0.000547065
P46779	RPL28	0.746343	Down	0.00773206
Q9UKZ1	CNOT11	0.746408	Down	0.000977735
P02042	HBD	0.746522	Down	0.0028242
Q15404	RSU1	0.746632	Down	6.96266e-05
P07437	TUBB	0.746929	Down	0.000505207
Q53EZ4	CEP55	0.747053	Down	1.99618e-05
Q9UPQ9	TNRC6B	0.747053	Down	0.02713
Q9NVM4	PRMT7	0.747181	Down	0.0149628
Q712K3	UBE2R2	0.747309	Down	7.64799e-05
Q14444	CAPRIN1	0.747559	Down	3.97263e-05
Q9NZL4	HSPBP1	0.747775	Down	0.000114663
Q9UKY7	CDV3	0.747818	Down	0.000302422
P37173	TGFBR2	0.74782	Down	0.000121536
Q9UBQ5	EIF3K	0.748193	Down	0.000126133
Q9Y547	HSPB11	0.748282	Down	4.74717e-05
Q9HB09	BCL2L12	0.748588	Down	8.73423e-05
P42574	CASP3	0.74869	Down	0.00502934
P51580	TPMT	0.748702	Down	4.62119e-05
P27635	RPL10	0.748833	Down	0.000234515
O15084	ANKRD28	0.749192	Down	0.00010788
Q05209	PTPN12	0.74932	Down	2.39536e-05
Q16878	CDO1	0.749477	Down	0.00329692
O95336	PGLS	0.749481	Down	6.16688e-06
P83731	RPL24	0.749547	Down	0.00470197
Q9NUU7	DDX19A	0.749713	Down	0.000161038
Q6P3X3	TTC27	0.749806	Down	1.55863e-05
Q96P48	ARAP1	0.750078	Down	0.000107426
Q92636	NSMAF	0.750118	Down	2.8866e-05
P00568	AK1	0.750158	Down	5.03636e-05
Q96AT1	KIAA1143	0.750245	Down	0.00111967
O43665	RGS10	0.750247	Down	4.59894e-05
P49643	PRIM2	0.750274	Down	1.77918e-05
Q9Y2Z0	SUGT1	0.750364	Down	4.84855e-06
P62837	UBE2D2	0.750392	Down	7.86018e-06
Q92546	RGP1	0.750628	Down	0.00334674
P05388	RPLP0	0.750685	Down	0.000165086
P54136	RARS1	0.750696	Down	1.77649e-05
P08708	RPS17	0.750855	Down	0.000292024
Q9BRP1	PDCD2L	0.751083	Down	0.0180471
Q86TU7	SETD3	0.751202	Down	3.53722e-05
P46781	RPS9	0.751329	Down	0.000741199
Q9HCN4	GPN1	0.751381	Down	0.000396034
O95373	IPO7	0.75169	Down	4.98076e-06
P51452	DUSP3	0.751803	Down	0.000449031
Q68CZ2	TNS3	0.75185	Down	3.40328e-05
P55060	CSE1L	0.751859	Down	1.137e-05
Q96EY9	ADAT3	0.751885	Down	0.00286492
Q9NR33	POLE4	0.751886	Down	0.000477353
Q9HA64	FN3KRP	0.751937	Down	2.80079e-05
Q53HC9	EIPR1	0.751949	Down	3.12706e-05
P56211	ARPP19	0.752038	Down	0.00210652
P07203	GPX1	0.752124	Down	0.0104738
O15530	PDPK1	0.752559	Down	0.000957945
Q13642	FHL1	0.752596	Down	0.000295218
Q13501	SQSTM1	0.752686	Down	7.16978e-05
Q9UMR2	DDX19B	0.752952	Down	0.0138639
P00491	PNP	0.752963	Down	4.64586e-05
Q5T6F2	UBAP2	0.753008	Down	0.000305832
Q16644	MAPKAPK3	0.753465	Down	0.000144833
Q9UBK8	MTRR	0.753488	Down	0.00252438
Q08752	PPID	0.753511	Down	8.33101e-05
Q96IZ0	PAWR	0.753575	Down	0.000146335
O95352	ATG7	0.753579	Down	2.29781e-05
Q15398	DLGAP5	0.753873	Down	1.71117e-05
Q9UBK9	UXT	0.75427	Down	0.000220629
O14737	PDCD5	0.754361	Down	0.00127397
Q16342	PDCD2	0.754462	Down	0.0124868
Q9HAV4	XPO5	0.754479	Down	0.000267559
Q9H446	RWDD1	0.754504	Down	3.5382e-06
P15170	GSPT1	0.754563	Down	4.70152e-05
P46060	RANGAP1	0.754631	Down	0.000219501
Q96DG6	CMBL	0.754746	Down	5.03589e-05
Q8IX07	ZFPM1	0.755003	Down	0.00371098
Q9UJU6	DBNL	0.755095	Down	0.000138841
Q13541	EIF4EBP1	0.755433	Down	0.000525142
Q9BUL8	PDCD10	0.755456	Down	0.000143411
Q969U7	PSMG2	0.755676	Down	6.0825e-05
P62249	RPS16	0.755702	Down	1.25009e-05
Q9Y3F4	STRAP	0.755716	Down	1.04074e-05
A0A024RBG1	NUDT4B	0.755791	Down	0.0134331
Q7L7V1	DHX32	0.75583	Down	0.00310175
Q13177	PAK2	0.755846	Down	4.67196e-05
Q86WQ0	NR2C2AP	0.755872	Down	4.98583e-05
P63220	RPS21	0.756377	Down	1.7593e-05
Q8IV38	ANKMY2	0.756527	Down	0.00683216
Q96E14	RMI2	0.756621	Down	0.015207
Q12979	ABR	0.756632	Down	1.14956e-05
Q9UHY8	FEZ2	0.756684	Down	0.0189703
Q16626	MEA1	0.756724	Down	0.000980792
Q9H4A5	GOLPH3L	0.756759	Down	0.000269243
O14545	TRAFD1	0.756819	Down	0.0127985
Q9BRT3	MIEN1	0.757036	Down	0.000125049
Q00796	SORD	0.757076	Down	6.92838e-06
P30566	ADSL	0.757109	Down	7.60028e-06
Q9NZA1	CLIC5	0.757184	Down	0.00144057
P18077	RPL35A	0.757214	Down	0.00172664
P33981	TTK	0.757232	Down	3.36384e-05
P61923	COPZ1	0.757573	Down	7.34583e-05
P23470	PTPRG	0.757793	Down	0.00891538
O15013	ARHGEF10	0.757892	Down	3.62442e-05
P35080	PFN2	0.757916	Down	7.79401e-05
Q9NPF0	CD320	0.758046	Down	8.71513e-05
Q9NZD2	GLTP	0.75807	Down	0.000606008
Q9HD40	SEPSECS	0.758301	Down	0.0040309
Q14192	FHL2	0.758333	Down	0.000976956
Q9H467	CUEDC2	0.758379	Down	9.36172e-05
O75663	TIPRL	0.758496	Down	4.98661e-05
P33176	KIF5B	0.758643	Down	8.21197e-06
O94903	PLPBP	0.758797	Down	0.00805744
Q8N5S9	CAMKK1	0.75895	Down	0.00937844
P48507	GCLM	0.759018	Down	8.36539e-06
Q15435	PPP1R7	0.759253	Down	3.53776e-05
P62244	RPS15A	0.759295	Down	0.00450515
Q7Z2Z2	EFL1	0.75935	Down	3.51306e-05
O43805	SSNA1	0.759406	Down	0.000302827
Q6AI08	HEATR6	0.759453	Down	7.80671e-06
P55263	ADK	0.759455	Down	8.08241e-06
P02792	FTL	0.759838	Down	0.0390655
Q9UMY4	SNX12	0.760338	Down	1.19057e-05
Q5T5Y3	CAMSAP1	0.760454	Down	0.000589328
Q9NUG6	PDRG1	0.76063	Down	0.00126824
P45983	MAPK8	0.760843	Down	4.53283e-06
Q5VZE5	NAA35	0.760883	Down	2.43254e-05
O43491	EPB41L2	0.760964	Down	0.000120732
P15880	RPS2	0.761337	Down	1.13774e-05
Q9NS87	KIF15	0.761428	Down	2.09784e-06
O15116	LSM1	0.761847	Down	0.00209538
Q9UHV9	PFDN2	0.762013	Down	0.000154419
Q8NC51	SERBP1	0.76231	Down	1.08215e-05
P51397	DAP	0.762356	Down	0.00286963
P09382	LGALS1	0.762456	Down	0.00238683
P27348	YWHAQ	0.762476	Down	0.000194847
Q9BXJ9	NAA15	0.762518	Down	3.0211e-05
O95456	PSMG1	0.762812	Down	9.57536e-05
P31327	CPS1	0.762819	Down	0.00739915
Q9Y3B8	REXO2	0.762904	Down	3.84859e-05
O15372	EIF3H	0.762934	Down	0.00026344
Q05397	PTK2	0.763177	Down	0.000467292
P16083	NQO2	0.76332	Down	0.00163381
O15511	ARPC5	0.763406	Down	0.000515312
P46777	RPL5	0.763678	Down	0.000923117
O60716	CTNND1	0.763694	Down	0.000117687
Q14157	UBAP2L	0.763763	Down	2.83471e-05
Q9UN73	PCDHA6	0.763814	Down	0.0324006
Q9H993	ARMT1	0.76398	Down	0.00409824
Q9Y613	FHOD1	0.764033	Down	5.5904e-05
Q9Y5K6	CD2AP	0.764197	Down	7.47457e-05
Q9UBI1	COMMD3	0.764257	Down	0.000354256
Q14152	EIF3A	0.764331	Down	1.00329e-05
P47224	RABIF	0.764413	Down	0.00946663
Q9NWV4	CZIB	0.764524	Down	0.000503524
Q9NUQ3	TXLNG	0.764547	Down	0.00313715
P61247	RPS3A	0.764563	Down	2.40748e-05
Q9NVE7	PANK4	0.764568	Down	0.000361056
Q8TEA8	DTD1	0.764602	Down	9.8678e-05
Q13332	PTPRS	0.764663	Down	0.00362495
Q9Y3E7	CHMP3	0.764715	Down	0.000428573
Q9Y4G6	TLN2	0.764739	Down	0.00014925
Q8N7X0	ADGB	0.764741	Down	3.88132e-05
Q9UJ41	RABGEF1	0.764814	Down	0.000364369
Q9UL63	MKLN1	0.764877	Down	5.27064e-06
Q13362	PPP2R5C	0.764886	Down	0.000117699
P23381	WARS1	0.765528	Down	7.54804e-05
Q6FI81	CIAPIN1	0.765728	Down	0.000166586
Q9UBB6	NCDN	0.765786	Down	0.000146763
B3KU38	IQCJ-SCHIP1	0.765882	Down	5.42535e-05
Q9BVW5	TIPIN	0.765894	Down	4.51912e-05
Q99767	APBA2	0.765905	Down	0.0298638
Q9H3S4	TPK1	0.765972	Down	0.00591987
Q9UPZ3	HPS5	0.766156	Down	0.000383195
O43399	TPD52L2	0.766266	Down	6.60264e-05
P24666	ACP1	0.766544	Down	2.11261e-05
Q9Y490	TLN1	0.766581	Down	4.54843e-06
Q6PJG6	BRAT1	0.76674	Down	0.000702321
P47895	ALDH1A3	0.766747	Down	4.25378e-05
B5ME19	EIF3CL	0.766829	Down	7.18221e-05
Q99733	NAP1L4	0.766962	Down	1.46415e-05
Q9UJK0	TSR3	0.766967	Down	0.000527281
Q9Y696	CLIC4	0.767001	Down	0.000269575
A3KN83	SBNO1	0.767079	Down	1.62275e-05
P57075	UBASH3A	0.767611	Down	0.00245209
Q8WZA0	LZIC	0.767756	Down	0.000313272
P62328	TMSB4X	0.767816	Down	0.00113604
P40429	RPL13A	0.768038	Down	0.000808211
O43592	XPOT	0.768143	Down	0.00135257
P11274	BCR	0.768155	Down	0.000530224
Q13347	EIF3I	0.768258	Down	3.22821e-07
P57076	CFAP298	0.768388	Down	0.000340804
P35221	CTNNA1	0.768486	Down	0.000647594
Q92783	STAM	0.768507	Down	4.77706e-05
O75312	ZPR1	0.768551	Down	9.58985e-05
P20073	ANXA7	0.768606	Down	5.79109e-05
Q07960	ARHGAP1	0.768702	Down	0.00158046
Q0VDF9	HSPA14	0.768779	Down	0.000106541
Q7L5Y1	ENOSF1	0.768873	Down	3.77445e-05
Q8TEC5	SH3RF2	0.768988	Down	0.00252412
Q08117	TLE5	0.769239	Down	6.8324e-05
Q9UBB4	ATXN10	0.769281	Down	5.1966e-05
P23919	DTYMK	0.769395	Down	3.85567e-05
Q96A49	SYAP1	0.769424	Down	8.0384e-06
Q8N6H7	ARFGAP2	0.769436	Down	0.000151019
P49207	RPL34	0.769639	Down	0.000260851
Q8IYD1	GSPT2	0.769678	Down	0.00342418
O75116	ROCK2	0.769699	Down	3.37519e-05
Q96SD1	DCLRE1C	0.769806	Down	0.0143326
P62910	RPL32	0.769854	Down	0.00121009
Q86Y56	DNAAF5	0.769922	Down	0.00010267
Q9BX40	LSM14B	0.769968	Down	3.68063e-05
Q15121	PEA15	0.770059	Down	0.000105369
Q9UGP4	LIMD1	0.770251	Down	1.18732e-05
Q8N0Z6	TTC5	0.770345	Down	0.000312817
Q7Z3E5	ARMC9	0.77039	Down	0.0118686
Q9Y6A5	TACC3	0.770596	Down	0.000220115
O75843	AP1G2	0.770616	Down	0.000396098
Q6P1Q9	METTL2B	0.770721	Down	0.0104576
Q99614	TTC1	0.770918	Down	4.44907e-05
Q99426	TBCB	0.771373	Down	0.000356295
Q13418	ILK	0.771444	Down	4.31484e-05
P05387	RPLP2	0.771531	Down	0.000496554
O43776	NARS1	0.771719	Down	5.59853e-06
Q12792	TWF1	0.771931	Down	4.27119e-05
Q9GZT8	NIF3L1	0.771936	Down	0.00419771
P63173	RPL38	0.771997	Down	0.00121869
P17812	CTPS1	0.772323	Down	2.072e-06
Q8TAE6	PPP1R14C	0.772405	Down	0.00396909
Q9Y376	CAB39	0.772412	Down	4.50839e-05
Q4J6C6	PREPL	0.772446	Down	0.000600381
Q8NFP7	NUDT10	0.772527	Down	5.66841e-05
Q8TBZ3	WDR20	0.772584	Down	0.0268769
Q9Y3U8	RPL36	0.772723	Down	0.00208827
P41250	GARS1	0.7728	Down	1.69093e-06
P15311	EZR	0.772896	Down	1.53384e-05
Q9BRS2	RIOK1	0.772905	Down	3.49369e-05
Q70IA6	MOB2	0.773009	Down	0.000201127
Q14106	TOB2	0.773011	Down	0.00272049
P52735	VAV2	0.773028	Down	3.01038e-05
Q6PD74	AAGAB	0.773173	Down	1.00266e-06
Q6GMV2	SMYD5	0.773564	Down	0.000282239
Q8IWB7	WDFY1	0.773618	Down	0.000347982
Q9BPX5	ARPC5L	0.773668	Down	1.59275e-07
P62854	RPS26	0.773695	Down	0.000450891
Q12834	CDC20	0.773711	Down	0.000980896
Q9BRA0	NAA38	0.773731	Down	0.00133809
Q96G03	PGM2	0.773861	Down	6.22132e-05
P06703	S100A6	0.773918	Down	0.000103603
Q8N3P4	VPS8	0.774067	Down	0.000459874
Q9H0R1	AP5M1	0.774067	Down	0.0167972
P22234	PAICS	0.774081	Down	2.16216e-05
O14980	XPO1	0.774094	Down	0.000331664
Q9Y587	AP4S1	0.774097	Down	0.00602481
Q6NZ67	MZT2B	0.774115	Down	0.000391211
Q8WUH2	TGFBRAP1	0.77414	Down	0.00886633
P61086	UBE2K	0.774421	Down	0.000303021
O43427	FIBP	0.774423	Down	8.23426e-05
O95149	SNUPN	0.774478	Down	4.40439e-06
Q9NTJ3	SMC4	0.774532	Down	1.51056e-06
P08397	HMBS	0.774568	Down	6.96353e-05
O94763	URI1	0.774643	Down	5.74017e-05
P07195	LDHB	0.774648	Down	4.08551e-05
O15145	ARPC3	0.774684	Down	5.27364e-06
O75815	BCAR3	0.774729	Down	5.79009e-05
Q96GX9	APIP	0.774913	Down	0.00226304
Q9H299	SH3BGRL3	0.774996	Down	0.000688682
Q6ZT12	UBR3	0.775096	Down	0.01117
Q8WV99	ZFAND2B	0.775126	Down	5.3416e-06
P61956	SUMO2	0.775155	Down	0.00414556
P62277	RPS13	0.775286	Down	0.000481572
O15371	EIF3D	0.775329	Down	6.05167e-05
P52732	KIF11	0.775431	Down	3.882e-05
P04083	ANXA1	0.775587	Down	2.85793e-06
Q9BW66	CINP	0.775728	Down	0.0229037
O75391	SPAG7	0.775735	Down	0.000247093
O75436	VPS26A	0.775748	Down	0.00174818
P15924	DSP	0.775795	Down	0.0110852
Q9H0A8	COMMD4	0.775813	Down	0.000125068
P61927	RPL37	0.775857	Down	0.00133392
O60443	GSDME	0.77596	Down	4.54245e-05
P50991	CCT4	0.775988	Down	6.7815e-05
Q8TDZ2	MICAL1	0.776055	Down	0.00236197
P18621	RPL17	0.776128	Down	8.8745e-05
Q15021	NCAPD2	0.776216	Down	0.00024287
Q9NVD7	PARVA	0.776336	Down	5.22229e-05
P49589	CARS1	0.776392	Down	9.36322e-05
Q9GZV4	EIF5A2	0.776404	Down	0.000203439
P62826	RAN	0.77642	Down	0.000616463
Q9BZD4	NUF2	0.776435	Down	0.000904682
Q96T88	UHRF1	0.776526	Down	0.000100795
Q8WU79	SMAP2	0.776566	Down	0.0109452
P55010	EIF5	0.77658	Down	0.000137245
Q7Z422	SZRD1	0.776697	Down	0.000366839
O00221	NFKBIE	0.776772	Down	4.17598e-05
P61088	UBE2N	0.776783	Down	0.000942238
Q9NRZ5	AGPAT4	0.776826	Down	0.00271913
Q96B97	SH3KBP1	0.776934	Down	2.32256e-05
O14733	MAP2K7	0.776988	Down	4.2943e-05
Q15814	TBCC	0.77702	Down	0.00104636
P62273	RPS29	0.777074	Down	0.00892114
Q9Y508	RNF114	0.777086	Down	0.00512452
Q6PGP7	SKIC3	0.777088	Down	3.38064e-05
Q9BQC3	DPH2	0.777198	Down	5.62747e-05
P55854	SUMO3	0.777251	Down	7.49318e-05
O43768	ENSA	0.777253	Down	0.000179764
P18085	ARF4	0.777401	Down	0.00107781
Q96CD2	PPCDC	0.77742	Down	0.00294998
Q9H3H3	C11orf68	0.777595	Down	4.35522e-05
O15305	PMM2	0.777613	Down	0.000373531
Q92696	RABGGTA	0.777695	Down	3.67282e-06
Q9UPQ0	LIMCH1	0.777742	Down	3.18794e-05
P46976	GYG1	0.777825	Down	0.00313507
Q7LBR1	CHMP1B	0.777877	Down	0.00029549
Q8NCE2	MTMR14	0.777898	Down	0.0004035
Q16537	PPP2R5E	0.778128	Down	0.000207092
Q15437	SEC23B	0.778143	Down	2.87414e-05
Q9UG63	ABCF2	0.778182	Down	6.48359e-06
P04350	TUBB4A	0.778285	Down	0.00452333
P12814	ACTN1	0.778306	Down	0.000242975
Q9P2J5	LARS1	0.778333	Down	0.00017288
Q9NQS1	AVEN	0.7784	Down	0.000413074
Q9H000	MKRN2	0.778434	Down	0.00733911
Q9GZN1	ACTR6	0.778438	Down	0.00214964
P46778	RPL21	0.778477	Down	0.000667522
Q96K76	USP47	0.778711	Down	1.54141e-05
Q5W0V3	FHIP2A	0.778731	Down	0.00568455
P31939	ATIC	0.778751	Down	5.56997e-07
P39019	RPS19	0.778819	Down	0.00221282
Q5PRF9	SAMD4B	0.778823	Down	0.000502085
Q00341	HDLBP	0.779003	Down	7.87317e-05
Q07866	KLC1	0.779157	Down	8.27323e-06
P62241	RPS8	0.779215	Down	0.0035304
Q14558	PRPSAP1	0.779231	Down	8.04064e-05
Q8NB37	GATD1	0.779265	Down	0.000725422
Q7Z4G1	COMMD6	0.779363	Down	5.48177e-06
P78371	CCT2	0.779411	Down	6.75796e-05
Q9Y3P9	RABGAP1	0.779411	Down	4.36343e-05
P47813	EIF1AX	0.779509	Down	0.000989321
O94760	DDAH1	0.779521	Down	0.00166819
Q9HC38	GLOD4	0.779536	Down	0.00302188
Q8NB46	ANKRD52	0.779602	Down	0.00115435
Q16543	CDC37	0.779627	Down	8.00292e-05
Q6ULP2	AFTPH	0.779694	Down	0.0144707
P61254	RPL26	0.779708	Down	0.00262281
P62937	PPIA	0.779748	Down	9.36271e-05
Q13685	AAMP	0.779858	Down	0.000106073
Q9Y5P4	CERT1	0.78006	Down	0.000749792
Q9UNN5	FAF1	0.780303	Down	8.40638e-07
Q8TF05	PPP4R1	0.78052	Down	7.71802e-05
Q9NZN5	ARHGEF12	0.780603	Down	0.0244902
Q9UHR6	ZNHIT2	0.780676	Down	0.000515251
Q8N1Q1	CA13	0.780704	Down	0.00150115
P54105	CLNS1A	0.78072	Down	0.000662699
Q9UQ13	SHOC2	0.780938	Down	9.1102e-05
Q9NRZ9	HELLS	0.78096	Down	7.34785e-05
Q9H4M9	EHD1	0.780969	Down	9.90492e-05
P62701	RPS4X	0.781005	Down	0.000630308
Q14CS0	UBXN2B	0.781081	Down	7.68019e-05
P06753	TPM3	0.781146	Down	6.18149e-05
Q9BY44	EIF2A	0.781404	Down	0.00125622
Q86VI3	IQGAP3	0.781454	Down	2.88766e-05
Q8N806	UBR7	0.781745	Down	0.000151889
Q96JJ3	ELMO2	0.781752	Down	4.12255e-06
C9J7I0	UMAD1	0.782238	Down	0.000721513
P63098	PPP3R1	0.782296	Down	0.00165856
Q04637	EIF4G1	0.78239	Down	8.29075e-06
Q92845	KIFAP3	0.782515	Down	3.23667e-05
Q9NQY0	BIN3	0.782638	Down	0.000112949
P41252	IARS1	0.782748	Down	2.84506e-07
P62269	RPS18	0.782806	Down	0.000180538
Q3KQU3	MAP7D1	0.782857	Down	7.44634e-05
Q15181	PPA1	0.782936	Down	0.000235961
Q8TD16	BICD2	0.78301	Down	9.76478e-06
P28482	MAPK1	0.783123	Down	0.000125807
P61160	ACTR2	0.783188	Down	1.22801e-05
Q9BRG1	VPS25	0.783217	Down	7.99138e-05
Q02750	MAP2K1	0.783275	Down	3.13278e-06
Q6NW29	RWDD4	0.783293	Down	1.11864e-05
Q9BXB5	OSBPL10	0.783293	Down	0.000386308
Q92973	TNPO1	0.783311	Down	3.33242e-05
Q9NYL2	MAP3K20	0.783345	Down	0.0008659
P11586	MTHFD1	0.783425	Down	2.75636e-06
Q9UI26	IPO11	0.783503	Down	0.000267375
Q9NVS9	PNPO	0.783579	Down	0.0246292
Q92830	KAT2A	0.783599	Down	0.00603837
O00560	SDCBP	0.783609	Down	0.000156272
Q9UPT9	USP22	0.783747	Down	1.98734e-05
P62266	RPS23	0.783772	Down	4.09312e-05
Q9Y484	WDR45	0.78393	Down	1.53727e-05
Q12802	AKAP13	0.783981	Down	6.49091e-05
Q9UPM8	AP4E1	0.784011	Down	3.64235e-05
P16333	NCK1	0.784115	Down	0.000371896
Q8NEB9	PIK3C3	0.784272	Down	1.07715e-05
Q15819	UBE2V2	0.784435	Down	0.000583134
O60749	SNX2	0.784573	Down	5.15135e-05
O75821	EIF3G	0.78462	Down	0.000146762
Q15276	RABEP1	0.784622	Down	0.000125214
P0DPB5	POLR1D	0.78472	Down	0.0293471
Q9H2J4	PDCL3	0.784726	Down	0.000114786
O76003	GLRX3	0.784749	Down	0.000162157
Q86WR0	CCDC25	0.784854	Down	0.000451348
Q86SZ2	TRAPPC6B	0.78486	Down	1.4292e-06
Q8NEC7	GSTCD	0.784889	Down	0.00375887
P49914	MTHFS	0.78492	Down	1.88221e-05
P18124	RPL7	0.785152	Down	0.000712762
O95486	SEC24A	0.785213	Down	0.000215609
Q96DM3	RMC1	0.785282	Down	2.19211e-05
P98170	XIAP	0.78529	Down	0.000419695
Q9UQ80	PA2G4	0.785576	Down	1.16715e-05
Q9NRR3	CDC42SE2	0.785605	Down	0.000303916
P18206	VCL	0.785763	Down	0.000120397
Q02543	RPL18A	0.785823	Down	0.00165489
Q5JTZ9	AARS2	0.785976	Down	0.000522636
P53582	METAP1	0.78613	Down	0.000548082
P49023	PXN	0.786186	Down	0.000216405
P11940	PABPC1	0.786246	Down	0.000272939
Q00534	CDK6	0.786324	Down	0.00242013
Q68CZ6	HAUS3	0.786357	Down	0.000249802
P15559	NQO1	0.786444	Down	3.48105e-05
P23526	AHCY	0.786646	Down	1.62308e-05
Q96T51	RUFY1	0.78673	Down	7.15222e-05
P31946	YWHAB	0.786817	Down	0.000597959
P67936	TPM4	0.787186	Down	0.00161602
P62424	RPL7A	0.787212	Down	0.00862389
Q02878	RPL6	0.787226	Down	9.92924e-05
P42677	RPS27	0.787355	Down	0.00071535
Q9BVS4	RIOK2	0.787366	Down	0.000134919
Q9Y6E2	BZW2	0.787377	Down	0.0006169
Q3KRA9	ALKBH6	0.78739	Down	0.0283287
P78552	IL13RA1	0.78763	Down	0.000532593
P25098	GRK2	0.787792	Down	0.000111752
Q99543	DNAJC2	0.787816	Down	0.000145483
Q9UNH7	SNX6	0.788005	Down	0.000491845
Q8WZA9	IRGQ	0.788123	Down	9.65564e-06
P62750	RPL23A	0.788202	Down	0.000669652
P09497	CLTB	0.788307	Down	0.000293297
P61204	ARF3	0.788347	Down	0.00665074
Q96EK6	GNPNAT1	0.788351	Down	1.04014e-05
Q9NVG8	TBC1D13	0.788409	Down	0.000148131
O43716	GATC	0.788553	Down	0.000783934
Q8TEQ6	GEMIN5	0.788679	Down	6.15644e-05
Q68DK2	ZFYVE26	0.788683	Down	0.000293728
Q15691	MAPRE1	0.78879	Down	5.11474e-05
P31749	AKT1	0.789023	Down	5.55686e-05
Q9BY42	RTF2	0.789082	Down	8.92871e-05
Q9ULC4	MCTS1	0.789098	Down	0.00157545
Q92995	USP13	0.789124	Down	8.31918e-05
P48739	PITPNB	0.789218	Down	1.77511e-05
O43175	PHGDH	0.789242	Down	3.97812e-05
Q7L273	KCTD9	0.789291	Down	0.00440583
P27707	DCK	0.789463	Down	0.00199827
Q4V328	GRIPAP1	0.789538	Down	0.00105948
P07814	EPRS1	0.78956	Down	5.70781e-05
Q13572	ITPK1	0.789633	Down	0.000139467
Q9HD15	SRA1	0.789665	Down	3.73772e-05
P30154	PPP2R1B	0.789711	Down	0.00347399
O95361	TRIM16	0.789762	Down	9.20277e-05
Q92888	ARHGEF1	0.789791	Down	6.49725e-05
O60232	ZNRD2	0.789815	Down	0.00177668
P60002	ELOF1	0.78991	Down	0.0424244
Q9UBS8	RNF14	0.789934	Down	8.77196e-05
Q9Y448	KNSTRN	0.78999	Down	0.000160904
Q8IX04	UEVLD	0.790107	Down	0.00212132
Q6UWE0	LRSAM1	0.790118	Down	0.0052434
P13489	RNH1	0.790151	Down	0.000387313
O15144	ARPC2	0.790195	Down	3.26203e-05
Q96JY6	PDLIM2	0.790207	Down	6.72534e-06
Q96BN8	OTULIN	0.790255	Down	5.61301e-05
O00214	LGALS8	0.790257	Down	0.00177531
Q8NFA0	USP32	0.790366	Down	0.001431
O75083	WDR1	0.790377	Down	2.90349e-05
Q9BVQ7	SPATA5L1	0.790394	Down	0.00160881
Q9NSI2	SLX9	0.790401	Down	0.000107812
O95793	STAU1	0.790571	Down	0.00112808
Q8WTP8	AEN	0.790715	Down	0.00284339
O95835	LATS1	0.79087	Down	0.00417238
P59998	ARPC4	0.790878	Down	2.26342e-05
Q9NP84	TNFRSF12A	0.791055	Down	0.00888529
O76039	CDKL5	0.791252	Down	0.0105812
Q13356	PPIL2	0.791265	Down	0.000147746
Q6IPR3	TYW3	0.791269	Down	7.47023e-05
P40818	USP8	0.791441	Down	3.76646e-05
Q15046	KARS1	0.791465	Down	2.06416e-05
Q96PZ2	FAM111A	0.791472	Down	0.00307657
P15531	NME1	0.791503	Down	3.16889e-05
Q8WU90	ZC3H15	0.791733	Down	0.00375303
Q8IY22	CMIP	0.791776	Down	0.00454861
Q96DH6	MSI2	0.791984	Down	0.000329504
P32969	RPL9P9	0.79209	Down	0.000881277
Q92859	NEO1	0.792169	Down	0.0261459
Q6PKG0	LARP1	0.792249	Down	0.000126562
P17655	CAPN2	0.792332	Down	0.000485453
Q00013	MPP1	0.792354	Down	0.00144381
Q9Y4E1	WASHC2C	0.79257	Down	0.0039791
Q92598	HSPH1	0.79274	Down	7.54013e-05
B3EWG6	FAM25G	0.792826	Down	0.00306127
Q9BZG8	DPH1	0.793022	Down	0.000239481
Q9Y5A9	YTHDF2	0.79313	Down	0.000207345
P61158	ACTR3	0.793206	Down	4.78977e-06
O00303	EIF3F	0.793213	Down	8.85334e-05
P49795	RGS19	0.793224	Down	0.0464102
O94817	ATG12	0.793356	Down	0.00456439
Q9UK39	NOCT	0.793376	Down	0.00252808
Q9H1P3	OSBPL2	0.793464	Down	0.000403735
Q8IYF1	ELOA2	0.793668	Down	0.00240504
P62913	RPL11	0.793702	Down	0.00180433
P62280	RPS11	0.793756	Down	0.00179097
Q9Y4E8	USP15	0.793768	Down	1.28558e-06
Q9H6T3	RPAP3	0.793855	Down	7.97648e-05
Q8N122	RPTOR	0.793906	Down	9.58083e-06
P57772	EEFSEC	0.794135	Down	0.00144889
Q8NBF6	AVL9	0.794177	Down	0.00893552
Q9BWT6	MND1	0.794286	Down	0.00420499
Q8NBT2	SPC24	0.794477	Down	1.24773e-05
Q16881	TXNRD1	0.794484	Down	7.25406e-06
Q14691	GINS1	0.794489	Down	0.000881804
Q8IWC1	MAP7D3	0.794502	Down	0.0305148
Q5SYE7	NHSL1	0.794546	Down	5.33398e-05
Q9ULT8	HECTD1	0.794589	Down	1.94151e-05
Q9H1J1	UPF3A	0.795132	Down	0.00108364
P00492	HPRT1	0.795173	Down	0.000334357
Q68DQ2	CRYBG3	0.795202	Down	9.38142e-05
Q3KQV9	UAP1L1	0.795248	Down	1.97793e-05
Q06124	PTPN11	0.795255	Down	0.000491431
Q9P2X3	IMPACT	0.795281	Down	0.0343391
P27448	MARK3	0.795323	Down	0.000470852
P48643	CCT5	0.79541	Down	1.23417e-05
Q6DHV7	ADAL	0.795549	Down	0.000747474
P62899	RPL31	0.79557	Down	0.0111483
Q96MV1	TLCD4	0.795627	Down	0.0405461
Q5JTW2	CEP78	0.795731	Down	0.00107121
P15374	UCHL3	0.795759	Down	0.000803318
P47897	QARS1	0.795764	Down	5.41859e-06
P30050	RPL12	0.79579	Down	0.000828798
Q92805	GOLGA1	0.795836	Down	0.00801241
O95067	CCNB2	0.795856	Down	0.0269567
Q9NZ52	GGA3	0.795886	Down	0.00574899
Q86XU0	ZNF677	0.795901	Down	0.00872237
Q86V21	AACS	0.796125	Down	0.000180081
P24941	CDK2	0.796147	Down	0.000340269
P55039	DRG2	0.796182	Down	0.000227335
Q9H3C7	GGNBP2	0.796239	Down	0.00281105
Q8WVT3	TRAPPC12	0.79627	Down	7.87316e-05
Q99836	MYD88	0.796416	Down	4.6784e-05
Q9UI10	EIF2B4	0.796452	Down	8.39765e-05
Q96MX6	DNAAF10	0.796456	Down	0.000944743
O75351	VPS4B	0.796469	Down	1.99724e-05
Q04206	RELA	0.796495	Down	0.00064032
Q9UEW8	STK39	0.796502	Down	0.00649114
Q9C0I1	MTMR12	0.796504	Down	0.00445314
P13798	APEH	0.796552	Down	1.15323e-05
Q96QF0	RAB3IP	0.796576	Down	0.0032887
P30086	PEBP1	0.796605	Down	0.000442768
Q96BW5	PTER	0.796644	Down	0.00197805
Q13155	AIMP2	0.796828	Down	0.0025535
Q5T2E6	ARMH3	0.797006	Down	0.0012712
P62263	RPS14	0.797053	Down	1.28118e-05
P49368	CCT3	0.797091	Down	1.16348e-06
P68371	TUBB4B	0.797154	Down	5.49739e-06
Q9Y5X3	SNX5	0.797156	Down	0.00086641
Q9NY33	DPP3	0.7972	Down	0.00120445
Q9UPT5	EXOC7	0.797472	Down	1.01162e-06
Q9ULX3	NOB1	0.797548	Down	0.000263114
P52888	THOP1	0.797561	Down	7.32751e-06
Q2M389	WASHC4	0.797579	Down	0.000454199
Q9P2E3	ZNFX1	0.797629	Down	0.00192993
Q9NP77	SSU72	0.797673	Down	0.00280499
Q9Y4P8	WIPI2	0.797797	Down	0.000956576
Q9UNT1	RABL2B	0.797801	Down	0.0258382
Q8TBF5	PIGX	0.797872	Down	0.00894289
O14772	FPGT	0.798182	Down	0.00144565
O15143	ARPC1B	0.798188	Down	0.000964234
P35606	COPB2	0.798201	Down	4.49367e-05
P54132	BLM	0.798239	Down	0.0136455
Q14166	TTLL12	0.798319	Down	0.000537663
O60524	NEMF	0.798346	Down	0.000133241
O75506	HSBP1	0.798363	Down	6.20234e-05
Q9NZI7	UBP1	0.798433	Down	0.00420827
Q96EY4	TMA16	0.798461	Down	3.53e-05
P35030	PRSS3	0.798472	Down	0.0227172
Q12974	PTP4A2	0.798485	Down	0.000286911
P49770	EIF2B2	0.798523	Down	3.55871e-05
Q9BTW9	TBCD	0.798728	Down	0.000339672
Q9NPQ8	RIC8A	0.79876	Down	0.000262363
Q7Z5L2	R3HCC1L	0.798767	Down	0.0129241
P40227	CCT6A	0.798806	Down	0.000792991
P62917	RPL8	0.79897	Down	0.00010576
Q9NXC5	MIOS	0.799016	Down	0.000295128
P68402	PAFAH1B2	0.799229	Down	0.00320304
Q8WYQ5	DGCR8	0.799289	Down	0.00368835
Q8WUW1	BRK1	0.799315	Down	0.000210892
Q9UMZ2	SYNRG	0.799336	Down	8.42713e-05
P23229	ITGA6	0.799347	Down	0.000930549
Q9NRY5	FAM114A2	0.799371	Down	0.00121586
Q06203	PPAT	0.799384	Down	0.00019173
Q9NP73	ALG13	0.799426	Down	0.00238791
Q15056	EIF4H	0.799519	Down	1.6027e-05
Q6FIF0	ZFAND6	0.799585	Down	0.00362482
Q9H0F6	SHARPIN	0.799609	Down	0.00242825
P05198	EIF2S1	0.799639	Down	9.18481e-05
O94822	LTN1	0.799685	Down	0.00180932
Q9H9T3	ELP3	0.799727	Down	0.000297413
Q9BRF8	CPPED1	0.799761	Down	0.00195274
Q9Y6E0	STK24	0.800017	Down	6.24632e-05
Q8TE02	ELP5	0.800106	Down	0.00111819
Q8NG68	TTL	0.800237	Down	0.00072221
Q9BVG4	PBDC1	0.800443	Down	1.21818e-05
Q71RC2	LARP4	0.800489	Down	9.37407e-05
Q9BY43	CHMP4A	0.800613	Down	0.000196885
O75330	HMMR	0.800753	Down	3.81935e-05
P07741	APRT	0.801042	Down	0.000125241
Q13404	UBE2V1	0.801246	Down	6.82655e-05
Q7L8W6	DPH6	0.80139	Down	0.00272642
O43502	RAD51C	0.801394	Down	0.00170048
Q13485	SMAD4	0.801475	Down	0.000108425
O43324	EEF1E1	0.801529	Down	0.000184295
P46109	CRKL	0.801559	Down	0.00224373
Q96EX3	DYNC2I2	0.801722	Down	0.013603
Q9Y3S2	ZNF330	0.801779	Down	0.0022545
O75146	HIP1R	0.801907	Down	0.00862253
Q9Y295	DRG1	0.801927	Down	0.000387177
Q9Y2T2	AP3M1	0.801944	Down	5.64039e-05
Q8NE01	CNNM3	0.802025	Down	0.0094291
Q99832	CCT7	0.802146	Down	1.4728e-06
Q9H2G2	SLK	0.802187	Down	5.61029e-05
Q9NQP4	PFDN4	0.802229	Down	0.000378207
Q9BRP4	PAAF1	0.802309	Down	0.00419689
Q9NRV9	HEBP1	0.802335	Down	9.40206e-07
P61513	RPL37A	0.802335	Down	5.01848e-05
Q8WUP2	FBLIM1	0.802747	Down	0.000117892
Q6AI12	ANKRD40	0.802758	Down	0.027448
P30530	AXL	0.802782	Down	0.0010585
Q9NRS6	SNX15	0.802821	Down	3.20137e-05
P61081	UBE2M	0.802988	Down	0.000129364
O95551	TDP2	0.803019	Down	0.0161906
Q9UNI6	DUSP12	0.80303	Down	4.3549e-05
Q9NSD9	FARSB	0.80332	Down	0.000136251
Q9P2D3	HEATR5B	0.803335	Down	0.00302751
Q96FS4	SIPA1	0.803537	Down	0.00187984
Q15185	PTGES3	0.803652	Down	0.0197844
Q5T4S7	UBR4	0.803827	Down	5.57131e-05
P49675	STAR	0.803836	Down	0.000206788
P53618	COPB1	0.803838	Down	0.000249726
Q9H8W4	PLEKHF2	0.804152	Down	0.00132384
Q9Y248	GINS2	0.804236	Down	0.0418276
Q9NWX6	THG1L	0.804447	Down	0.000165748
Q8N1B4	VPS52	0.80447	Down	0.00565815
Q9NUQ6	SPATS2L	0.804499	Down	0.00149991
Q92871	PMM1	0.804501	Down	0.0102391
Q8WUM9	SLC20A1	0.804518	Down	0.000307969
Q13546	RIPK1	0.804559	Down	0.0012305
Q13596	SNX1	0.804598	Down	0.000641475
O00233	PSMD9	0.804604	Down	0.000104524
O14964	HGS	0.804622	Down	0.000139087
Q7L266	ASRGL1	0.804656	Down	0.00460605
Q8IWD4	CCDC117	0.804819	Down	0.00430528
Q9Y4E6	WDR7	0.804855	Down	0.00305363
O95372	LYPLA2	0.805041	Down	0.00661327
Q13045	FLII	0.80531	Down	5.45289e-06
Q14694	USP10	0.805366	Down	3.38427e-05
Q12765	SCRN1	0.805429	Down	0.000109536
Q9NSC5	HOMER3	0.805495	Down	5.59546e-05
Q9UPR3	SMG5	0.80558	Down	0.000766606
P46783	RPS10	0.805604	Down	8.23063e-05
Q07864	POLE	0.805653	Down	0.000404126
Q9UGI8	TES	0.805696	Down	0.00013807
Q9Y5T5	USP16	0.805707	Down	0.000777981
Q9H7B4	SMYD3	0.805794	Down	0.000521517
Q15750	TAB1	0.805813	Down	0.00123661
Q8N5P1	ZC3H8	0.805859	Down	0.0136884
O75886	STAM2	0.805939	Down	7.08274e-05
Q9UQ03	CORO2B	0.806077	Down	0.0413901
P62829	RPL23	0.806101	Down	0.00045598
Q9Y5P6	GMPPB	0.806224	Down	7.95489e-05
O14562	UBFD1	0.80623	Down	0.00249616
Q7Z478	DHX29	0.806334	Down	1.49972e-05
P42898	MTHFR	0.80647	Down	0.0192856
P55327	TPD52	0.806705	Down	1.46943e-05
P0DP25	CALM3	0.80688	Down	0.000659686
Q147X3	NAA30	0.806884	Down	7.99614e-05
Q9H074	PAIP1	0.807082	Down	0.000379849
Q00688	FKBP3	0.807143	Down	0.000129778
P17987	TCP1	0.807147	Down	0.00028735
Q9BR76	CORO1B	0.807201	Down	0.000154798
O15523	DDX3Y	0.807311	Down	0.00195701
P31949	S100A11	0.807542	Down	0.0071038
Q03154	ACY1	0.807578	Down	0.000224358
Q14232	EIF2B1	0.807623	Down	0.000573692
P28676	GCA	0.807634	Down	0.000496234
O60256	PRPSAP2	0.807673	Down	5.6535e-05
P62888	RPL30	0.807714	Down	0.00683414
Q8TC07	TBC1D15	0.807834	Down	0.000174262
Q9P2R3	ANKFY1	0.80797	Down	0.000416128
Q9HB96	FANCE	0.808033	Down	0.011261
Q13310	PABPC4	0.808125	Down	0.000105229
Q9NX02	NLRP2	0.808129	Down	8.5313e-05
Q96AZ6	ISG20	0.808142	Down	0.0016201
Q9NUQ8	ABCF3	0.808149	Down	0.000499028
O15111	CHUK	0.8083	Down	3.95438e-05
Q9Y5B8	NME7	0.808336	Down	0.0341512
Q99497	PARK7	0.808384	Down	7.97701e-06
Q13442	PDAP1	0.808407	Down	0.000303827
P23396	RPS3	0.808573	Down	0.000275952
Q08AD1	CAMSAP2	0.808657	Down	0.00230322
Q9UK41	VPS28	0.808745	Down	0.00133391
Q14240	EIF4A2	0.808767	Down	0.00391578
Q05639	EEF1A2	0.808878	Down	8.63022e-05
Q9H9A6	LRRC40	0.808894	Down	1.45098e-06
Q9Y5A7	NUB1	0.808965	Down	0.0150022
P39023	RPL3	0.809216	Down	0.000610875
P53367	ARFIP1	0.809308	Down	1.83561e-05
Q9UBQ0	VPS29	0.809461	Down	4.61224e-05
Q8WUM4	PDCD6IP	0.809642	Down	2.10254e-05
Q8TBX8	PIP4K2C	0.809646	Down	1.25474e-05
Q68EM7	ARHGAP17	0.809661	Down	6.2219e-05
Q9GZZ9	UBA5	0.809734	Down	0.000262474
Q8IY47	KBTBD2	0.809914	Down	0.00522411
P11766	ADH5	0.810048	Down	4.0645e-05
P62341	SELENOT	0.810161	Down	0.0202239
O00203	AP3B1	0.810181	Down	9.76194e-06
P49815	TSC2	0.810204	Down	0.00125554
P07900	HSP90AA1	0.810221	Down	0.000723866
Q5VW32	BROX	0.810335	Down	0.000100195
P78324	SIRPA	0.810398	Down	0.0014278
Q9H6S3	EPS8L2	0.810471	Down	0.000279915
O00499	BIN1	0.8105	Down	0.0386009
Q99471	PFDN5	0.810543	Down	6.87156e-05
Q8IUR0	TRAPPC5	0.810582	Down	2.3294e-05
Q9HD26	GOPC	0.81061	Down	0.000483056
Q99720	SIGMAR1	0.810655	Down	0.00146963
P62906	RPL10A	0.810663	Down	1.78509e-05
P49902	NT5C2	0.810745	Down	0.00223858
Q00653	NFKB2	0.810782	Down	2.61401e-05
P50851	LRBA	0.810827	Down	0.000356644
Q9Y5L0	TNPO3	0.81097	Down	0.00567934
P26373	RPL13	0.811	Down	0.00221236
Q68CQ7	GLT8D1	0.811067	Down	0.00895712
Q13772	NCOA4	0.811167	Down	0.00227365
O95817	BAG3	0.811219	Down	6.80554e-05
P05408	SCG5	0.811339	Down	0.000250739
O75676	RPS6KA4	0.811354	Down	0.000948467
Q7Z6B0	CCDC91	0.811405	Down	0.0107601
O14757	CHEK1	0.811431	Down	0.00481041
Q969Q0	RPL36AL	0.811438	Down	0.0025656
Q9Y5V3	MAGED1	0.811553	Down	1.01737e-05
P11908	PRPS2	0.811626	Down	7.21452e-06
Q08334	IL10RB	0.811705	Down	0.00512377
Q9UNF0	PACSIN2	0.811763	Down	0.00117437
Q5JUR7	TEX30	0.811932	Down	0.000925898
P47914	RPL29	0.811993	Down	0.00156147
Q14204	DYNC1H1	0.81204	Down	3.30943e-05
P21980	TGM2	0.812078	Down	3.54019e-08
Q96D71	REPS1	0.812097	Down	0.00155529
Q9BPX3	NCAPG	0.812175	Down	4.192e-05
Q9BYT8	NLN	0.812464	Down	3.3994e-05
Q14155	ARHGEF7	0.812472	Down	2.44009e-05
O95163	ELP1	0.812541	Down	2.17724e-05
Q6P0Q8	MAST2	0.812677	Down	0.032089
P51808	DYNLT3	0.812763	Down	0.0111236
P62714	PPP2CB	0.812804	Down	0.00183991
Q96CS2	HAUS1	0.81281	Down	0.00834797
Q0PNE2	ELP6	0.812979	Down	0.000214924
P26640	VARS1	0.813039	Down	7.80192e-05
Q8N531	FBXL6	0.813107	Down	0.000159626
Q9UQB8	BAIAP2	0.81312	Down	5.10767e-06
P52594	AGFG1	0.813129	Down	0.000278419
P10644	PRKAR1A	0.813233	Down	0.000410448
P19838	NFKB1	0.813297	Down	0.000624287
P29144	TPP2	0.8133	Down	2.92469e-06
Q8IWR0	ZC3H7A	0.813306	Down	0.000137124
O00178	GTPBP1	0.813441	Down	0.00258511
Q9UJT0	TUBE1	0.813582	Down	0.000552593
Q9NZW5	PALS2	0.813584	Down	0.000258213
Q15811	ITSN1	0.813601	Down	0.00935962
P50995	ANXA11	0.813654	Down	0.00019694
Q6GMV3	PTRHD1	0.813761	Down	1.87553e-05
Q15555	MAPRE2	0.813791	Down	0.00720962
Q9UID3	VPS51	0.813793	Down	0.0018218
P54252	ATXN3	0.81397	Down	0.00114131
P31153	MAT2A	0.814175	Down	0.000191126
Q9BR61	ACBD6	0.814195	Down	0.010819
Q00526	CDK3	0.814214	Down	0.000813999
Q9UHD2	TBK1	0.814269	Down	3.55067e-06
Q9NX01	TXNL4B	0.814393	Down	0.00217879
Q24JP5	TMEM132A	0.81444	Down	0.00217828
Q9UJ70	NAGK	0.814493	Down	5.90987e-05
P56192	MARS1	0.814568	Down	0.000100622
P60891	PRPS1	0.814732	Down	1.20464e-05
O75884	RBBP9	0.814854	Down	0.00239762
P78417	GSTO1	0.814974	Down	4.32542e-05
Q9ULV4	CORO1C	0.814976	Down	0.00919724
Q8WUR7	C15orf40	0.815018	Down	6.32389e-05
Q9NXD2	MTMR10	0.815106	Down	0.00503441
Q96BJ3	AIDA	0.815112	Down	1.7367e-05
Q9BSF8	BTBD10	0.815114	Down	0.0354345
P26038	MSN	0.815121	Down	7.75052e-05
O95997	PTTG1	0.81514	Down	0.00183218
Q8N8S7	ENAH	0.815214	Down	2.23804e-05
Q5SW96	LDLRAP1	0.815231	Down	0.00474092
Q04917	YWHAH	0.815426	Down	0.000249284
P52788	SMS	0.815577	Down	0.000126208
Q5VWZ2	LYPLAL1	0.815726	Down	0.00575547
Q92616	GCN1	0.815739	Down	5.79603e-05
P30043	BLVRB	0.815764	Down	1.86217e-06
Q9GZT9	EGLN1	0.81579	Down	0.00134315
Q9Y6W3	CAPN7	0.815941	Down	0.000449531
O00506	STK25	0.816111	Down	0.000530518
Q9P253	VPS18	0.816199	Down	0.00101593
Q9UQ53	MGAT4B	0.816201	Down	0.0168277
Q96IU4	ABHD14B	0.816273	Down	0.000502736
O95295	SNAPIN	0.816328	Down	3.52374e-05
Q6XZF7	DNMBP	0.816448	Down	0.000298785
Q8WU76	SCFD2	0.816467	Down	0.012981
Q49AR2	C5orf22	0.81656	Down	0.000370318
P50748	KNTC1	0.816644	Down	0.00556709
Q96CN9	GCC1	0.816671	Down	0.000130305
P63104	YWHAZ	0.816688	Down	0.000244789
O00219	HAS3	0.816901	Down	0.00164898
O14617	AP3D1	0.816971	Down	0.000469808
P04632	CAPNS1	0.817031	Down	0.00115096
Q96SB4	SRPK1	0.817179	Down	0.00717086
Q9H0B6	KLC2	0.817384	Down	0.0004891
Q8IZP0	ABI1	0.817422	Down	4.12219e-05
Q9NRG1	PRTFDC1	0.817426	Down	0.00709643
O95466	FMNL1	0.81746	Down	0.000165161
P50914	RPL14	0.817526	Down	3.6637e-05
P17931	LGALS3	0.817734	Down	0.00362242
Q9Y371	SH3GLB1	0.817745	Down	0.00328612
Q13509	TUBB3	0.817755	Down	0.00120861
Q15366	PCBP2	0.817789	Down	0.000745473
Q96MW1	CCDC43	0.817942	Down	0.000537467
Q6P2H3	CEP85	0.817953	Down	0.0153179
Q8TDX7	NEK7	0.818012	Down	0.00525386
P50990	CCT8	0.818214	Down	0.000130825
P50443	SLC26A2	0.818227	Down	0.001441
Q8TE04	PANK1	0.818276	Down	0.00165755
P04406	GAPDH	0.818305	Down	6.99301e-05
Q13043	STK4	0.818358	Down	0.000216521
Q14C86	GAPVD1	0.818394	Down	0.000419969
Q9UGV2	NDRG3	0.818401	Down	0.00190467
Q96BX8	MOB3A	0.818549	Down	0.000936652
Q9UBP0	SPAST	0.818596	Down	0.00329224
O60841	EIF5B	0.818615	Down	6.41659e-05
Q13409	DYNC1I2	0.818653	Down	6.92433e-05
Q13885	TUBB2A	0.818717	Down	0.000178475
Q14376	GALE	0.818747	Down	0.000110803
Q9Y4R8	TELO2	0.818795	Down	0.00839261
Q9GZP4	PITHD1	0.818933	Down	0.00810496
P41440	SLC19A1	0.819027	Down	0.00478937
P30153	PPP2R1A	0.819078	Down	0.000124607
P46937	YAP1	0.819239	Down	0.00277136
P22090	RPS4Y1	0.819419	Down	0.000494309
Q5H9R7	PPP6R3	0.819574	Down	0.000277747
Q9Y5X1	SNX9	0.819862	Down	9.7081e-05
Q9Y450	HBS1L	0.81991	Down	2.58652e-05
P41743	PRKCI	0.820021	Down	8.31486e-05
P62841	RPS15	0.820082	Down	0.00211331
Q9ULH1	ASAP1	0.820148	Down	0.00508751
Q9NR46	SH3GLB2	0.820167	Down	8.81865e-05
A8K0Z3	WASHC1	0.820275	Down	5.13834e-05
P37802	TAGLN2	0.820309	Down	0.00428793
Q99808	SLC29A1	0.820453	Down	0.000656381
O75828	CBR3	0.820472	Down	0.000412147
Q9NWZ5	UCKL1	0.820503	Down	0.00166924
Q5TFE4	NT5DC1	0.820689	Down	0.000178607
P36507	MAP2K2	0.820713	Down	5.26868e-06
O95347	SMC2	0.820745	Down	9.53721e-06
O94830	DDHD2	0.820749	Down	0.00266693
P04049	RAF1	0.820853	Down	3.88905e-06
Q96C19	EFHD2	0.82091	Down	1.57471e-05
Q9GZT4	SRR	0.820982	Down	0.00751202
P50552	VASP	0.82106	Down	0.0003548
Q15057	ACAP2	0.821091	Down	1.73401e-06
Q86VX9	MON1A	0.821113	Down	0.0080744
P55884	EIF3B	0.821136	Down	0.000246605
O75179	ANKRD17	0.821187	Down	1.6606e-05
O00743	PPP6C	0.821263	Down	1.40927e-06
P32455	GBP1	0.821282	Down	7.49669e-06
Q01518	CAP1	0.821324	Down	6.63325e-06
Q9BYB4	GNB1L	0.821425	Down	0.0118431
P48454	PPP3CC	0.821713	Down	0.0181433
Q969S3	ZNF622	0.821728	Down	7.58823e-06
O43414	ERI3	0.822051	Down	0.0464863
Q8IV50	LYSMD2	0.82211	Down	0.00272696
O43707	ACTN4	0.822245	Down	0.00279027
Q9NUP7	TRMT13	0.822471	Down	5.2569e-05
Q15678	PTPN14	0.822551	Down	0.00203849
O75896	TUSC2	0.822612	Down	0.00935006
Q7Z6K3	PTAR1	0.822959	Down	0.00506455
Q6IA86	ELP2	0.822994	Down	0.000572794
Q9UH65	SWAP70	0.823007	Down	0.000136389
Q9Y289	SLC5A6	0.823252	Down	0.00030316
Q9Y6D6	ARFGEF1	0.823367	Down	1.6953e-05
Q03169	TNFAIP2	0.823517	Down	0.000773434
O14777	NDC80	0.823591	Down	0.0139308
Q02790	FKBP4	0.82361	Down	0.000119837
P78344	EIF4G2	0.823709	Down	0.000294373
O43318	MAP3K7	0.823806	Down	0.034465
P62753	RPS6	0.823859	Down	0.0222132
O15498	YKT6	0.823886	Down	0.000157948
Q5T0F9	CC2D1B	0.823901	Down	0.000181183
Q6P1N9	TATDN1	0.823922	Down	0.000496323
P12268	IMPDH2	0.823937	Down	0.000468357
Q86XA9	HEATR5A	0.824212	Down	0.00728535
P63172	DYNLT1	0.824303	Down	0.0466317
P61313	RPL15	0.824314	Down	0.000564039
Q15003	NCAPH	0.824448	Down	0.00268824
Q13283	G3BP1	0.824465	Down	0.000109803
Q9Y478	PRKAB1	0.824709	Down	0.0325466
O95628	CNOT4	0.824737	Down	0.0227213
Q04864	REL	0.824791	Down	0.00242358
Q9H5N1	RABEP2	0.82481	Down	0.000207529
Q32MZ4	LRRFIP1	0.824915	Down	0.000380333
A9UHW6	MIF4GD	0.824917	Down	0.00173724
Q9H4A6	GOLPH3	0.824939	Down	0.000314926
O00308	WWP2	0.824979	Down	0.00784857
Q9NUL3	STAU2	0.825115	Down	0.0015269
Q5HYK7	SH3D19	0.825147	Down	0.00648353
P35237	SERPINB6	0.825336	Down	0.00178149
Q93052	LPP	0.825351	Down	5.83919e-05
Q9Y530	OARD1	0.82541	Down	0.0184043
Q99707	MTR	0.825519	Down	0.00190525
P36405	ARL3	0.825612	Down	0.0238324
Q9UPU5	USP24	0.825679	Down	0.000186655
Q01433	AMPD2	0.825698	Down	0.000896731
Q8TCD5	NT5C	0.825958	Down	0.000604253
Q8IUI8	CRLF3	0.825994	Down	0.00188231
P10768	ESD	0.82608	Down	3.36218e-05
P15923	TCF3	0.826116	Down	0.00025235
Q9UHJ6	SHPK	0.82613	Down	0.000180935
Q53RE8	ANKRD39	0.826149	Down	0.0324066
P20936	RASA1	0.826177	Down	0.00053637
Q9H9C1	VIPAS39	0.826257	Down	0.00030605
P54725	RAD23A	0.82645	Down	0.000465995
Q9NQR4	NIT2	0.826574	Down	5.40892e-05
Q9HBL8	NMRAL1	0.826576	Down	0.0123368
Q9H0C8	ILKAP	0.826594	Down	3.80743e-05
Q6PL24	TMED8	0.826651	Down	0.0127351
Q15527	SURF2	0.826739	Down	0.0009634
P24386	CHM	0.826798	Down	0.00117347
O43314	PPIP5K2	0.826993	Down	0.000608464
Q8N392	ARHGAP18	0.827125	Down	0.00243853
P42566	EPS15	0.82722	Down	0.001835
Q6ZSZ5	ARHGEF18	0.8273	Down	0.002409
Q9Y2X7	GIT1	0.827385	Down	0.00327693
Q9BZQ6	EDEM3	0.827421	Down	0.000587716
P31948	STIP1	0.827429	Down	2.20404e-05
Q14008	CKAP5	0.82748	Down	0.000532868
Q9NS86	LANCL2	0.827645	Down	1.05821e-05
P61626	LYZ	0.827725	Down	0.0377609
O43633	CHMP2A	0.827891	Down	0.00391758
P09496	CLTA	0.827964	Down	0.00222819
Q96IV0	NGLY1	0.8281	Down	0.000816654
Q9Y6R4	MAP3K4	0.828157	Down	0.046288
P50583	NUDT2	0.828197	Down	0.00465116
Q9BTE3	MCMBP	0.828201	Down	6.83101e-05
Q2VPK5	CTU2	0.828205	Down	0.0221289
Q9NRX4	PHPT1	0.828234	Down	0.00615425
P48444	ARCN1	0.82827	Down	0.000159879
O75175	CNOT3	0.828289	Down	8.06906e-05
Q13287	NMI	0.828329	Down	5.67562e-05
Q96RF0	SNX18	0.828349	Down	0.0248793
Q9Y6G9	DYNC1LI1	0.828458	Down	0.000188962
Q7Z3T8	ZFYVE16	0.828532	Down	1.13787e-06
Q9HAU4	SMURF2	0.82855	Down	0.000168246
P49366	DHPS	0.828703	Down	0.00865309
Q9H977	WDR54	0.82873	Down	0.00102962
O75688	PPM1B	0.828764	Down	4.13017e-05
Q9NVZ3	NECAP2	0.828791	Down	0.00111569
Q0JRZ9	FCHO2	0.829026	Down	0.000961827
P43034	PAFAH1B1	0.829174	Down	1.44938e-05
Q5GLZ8	HERC4	0.829205	Down	0.000319173
Q9NYP9	MIS18A	0.829369	Down	0.000113363
P63096	GNAI1	0.829467	Down	0.00933043
Q8TEW0	PARD3	0.829563	Down	0.00136483
Q8TDQ7	GNPDA2	0.829799	Down	0.0315416
O60888	CUTA	0.829845	Down	0.0283016
Q8N3C0	ASCC3	0.830006	Down	9.95555e-05
O15397	IPO8	0.830063	Down	3.13517e-05
Q86W34	AMZ2	0.830136	Down	0.0436866
Q7Z569	BRAP	0.830182	Down	0.0068319
Q8N1W1	ARHGEF28	0.83028	Down	5.18244e-05
Q9GZQ3	COMMD5	0.830301	Down	0.000348613
Q96AX1	VPS33A	0.830311	Down	0.000290508
Q9UNS1	TIMELESS	0.83037	Down	2.56839e-05
Q5VT25	CDC42BPA	0.830514	Down	0.00321322
P52789	HK2	0.830708	Down	0.000433974
P31689	DNAJA1	0.830743	Down	0.000776147
Q9NQ48	LZTFL1	0.830825	Down	1.3022e-05
Q9C0C9	UBE2O	0.830865	Down	0.000232947
Q8IWE5	PLEKHM2	0.830965	Down	0.0100407
P08238	HSP90AB1	0.831305	Down	0.000117166
P40763	STAT3	0.831319	Down	0.000142129
Q96SZ6	CDK5RAP1	0.831334	Down	0.0174437
P80217	IFI35	0.831445	Down	0.000210794
P53621	COPA	0.831463	Down	0.000147118
P55283	CDH4	0.831561	Down	0.000104117
P42766	RPL35	0.831568	Down	0.0161193
Q9HBI1	PARVB	0.83162	Down	0.00116202
Q9H2U1	DHX36	0.831883	Down	0.00240434
P54619	PRKAG1	0.831928	Down	0.00117057
Q9H0E2	TOLLIP	0.831939	Down	0.000622715
Q8WVJ2	NUDCD2	0.831995	Down	0.000224398
Q9NYL9	TMOD3	0.832083	Down	0.00100535
Q12904	AIMP1	0.832155	Down	5.87161e-05
Q13049	TRIM32	0.832574	Down	0.000380422
Q6ZW76	ANKS3	0.832585	Down	0.00669806
Q9NWS0	PIH1D1	0.832768	Down	0.00011199
Q14974	KPNB1	0.833045	Down	0.000202992
A6NJ78	METTL15	0.833243	Down	0.0194794
P62820	RAB1A	1.20017	Up	0.00435826
Q8NHP6	MOSPD2	1.20058	Up	0.000270659
Q92769	HDAC2	1.20062	Up	9.0031e-05
Q15393	SF3B3	1.20067	Up	5.42129e-05
P85037	FOXK1	1.20088	Up	0.00167945
Q9H7Z7	PTGES2	1.20094	Up	5.63586e-06
Q08379	GOLGA2	1.20096	Up	0.000247947
P08236	GUSB	1.20107	Up	0.0140042
Q9Y6X4	FAM169A	1.20109	Up	0.00265031
Q99714	HSD17B10	1.20109	Up	4.90676e-06
Q5T200	ZC3H13	1.20139	Up	3.78806e-07
O95707	POP4	1.20149	Up	0.00512738
O43292	GPAA1	1.20152	Up	0.000959691
Q69YN4	VIRMA	1.20156	Up	0.000101173
P09012	SNRPA	1.20184	Up	0.0088918
Q8IWT6	LRRC8A	1.20186	Up	0.0359372
P35227	PCGF2	1.20215	Up	0.00519068
Q8N3X1	FNBP4	1.20222	Up	0.000527942
O75110	ATP9A	1.20261	Up	4.26529e-05
Q8WUM0	NUP133	1.20271	Up	0.00519747
Q9H936	SLC25A22	1.2028	Up	0.0054165
Q9HCD5	NCOA5	1.20283	Up	0.00124962
Q9NX40	OCIAD1	1.20316	Up	0.00153857
O95639	CPSF4	1.20319	Up	0.00521686
Q7L014	DDX46	1.20324	Up	5.2298e-05
Q9UMS4	PRPF19	1.20328	Up	0.00446304
Q9NXS2	QPCTL	1.20334	Up	0.00248167
O14678	ABCD4	1.20342	Up	0.00516745
Q9BQQ3	GORASP1	1.20345	Up	0.00397228
Q96I25	RBM17	1.20346	Up	0.00125201
O95159	ZFPL1	1.20347	Up	0.00146962
P60763	RAC3	1.20378	Up	0.00124672
Q9P275	USP36	1.20389	Up	5.29308e-05
Q9H845	ACAD9	1.20413	Up	4.08295e-05
O60318	MCM3AP	1.20422	Up	0.0011326
P49069	CAMLG	1.20451	Up	0.00717215
Q8NF37	LPCAT1	1.20456	Up	0.000122005
Q9NRR4	DROSHA	1.20468	Up	0.00192689
Q8IY26	PLPP6	1.20507	Up	0.0130807
P82664	MRPS10	1.20509	Up	0.00342341
O60293	ZFC3H1	1.20544	Up	0.00261459
P84243	H3-3B	1.20552	Up	0.0227297
Q13503	MED21	1.20559	Up	0.00196303
Q9Y5M8	SRPRB	1.2058	Up	0.000451436
Q3B726	POLR1F	1.20589	Up	0.00152381
Q15006	EMC2	1.206	Up	0.000986744
Q16270	IGFBP7	1.20601	Up	0.00419587
Q9NR30	DDX21	1.20609	Up	0.000714752
Q8IY81	FTSJ3	1.20622	Up	0.00625002
Q3SXM5	HSDL1	1.20637	Up	0.0025839
Q9BYG3	NIFK	1.20646	Up	0.00421131
Q5SY16	NOL9	1.20659	Up	0.000223791
P15586	GNS	1.20663	Up	0.000121053
P50607	TUB	1.20674	Up	0.0244567
P06396	GSN	1.20695	Up	0.00275637
O43772	SLC25A20	1.20698	Up	0.00356326
Q9Y6N5	SQOR	1.20716	Up	0.00614121
Q92797	SYMPK	1.20716	Up	0.000703385
Q7Z4V5	HDGFL2	1.20718	Up	8.82529e-05
Q9P013	CWC15	1.20782	Up	4.42858e-06
Q96IW7	SEC22A	1.20794	Up	0.00356263
P09622	DLD	1.2083	Up	0.00371867
Q9Y657	SPIN1	1.20834	Up	0.0100843
Q8N7H5	PAF1	1.20839	Up	9.22563e-05
P63027	VAMP2	1.20897	Up	0.00301163
Q8N0U8	VKORC1L1	1.209	Up	0.00385103
Q9BVP2	GNL3	1.20915	Up	0.00700609
P56589	PEX3	1.20995	Up	0.00172845
Q96LT4	SAMD8	1.21011	Up	0.0120859
A8CG34	POM121C	1.2102	Up	0.0172063
Q9BSC4	NOL10	1.21049	Up	0.000100034
Q9BW60	ELOVL1	1.21055	Up	0.00232788
P06748	NPM1	1.21061	Up	0.00669152
P05165	PCCA	1.21063	Up	0.000214633
O43325	LYRM1	1.21065	Up	0.0202278
Q15637	SF1	1.21077	Up	0.00559639
Q8TBM8	DNAJB14	1.21082	Up	0.00509536
O15061	SYNM	1.21091	Up	0.00342964
P62316	SNRPD2	1.21096	Up	0.00752684
P42285	MTREX	1.21099	Up	0.000257918
Q15836	VAMP3	1.21128	Up	0.00672633
Q6NZY4	ZCCHC8	1.21147	Up	0.000189112
Q9H0V9	LMAN2L	1.21153	Up	0.00025029
P50213	IDH3A	1.21155	Up	0.00188266
Q9BVT8	TMUB1	1.2116	Up	8.63084e-05
Q9BY50	SEC11C	1.21165	Up	0.0014824
Q13162	PRDX4	1.21173	Up	0.000791027
P32780	GTF2H1	1.21225	Up	0.000225944
Q9P2K5	MYEF2	1.21225	Up	0.00169385
O00400	SLC33A1	1.21231	Up	0.000131516
Q9ULF5	SLC39A10	1.21236	Up	0.0120746
Q8N9M1	C19orf47	1.21237	Up	0.0051341
Q8N8R3	SLC25A29	1.21261	Up	4.63863e-05
Q9UMX5	NENF	1.21269	Up	0.00182054
Q9Y3E5	PTRH2	1.21272	Up	0.00116937
Q9BSH4	TACO1	1.21289	Up	0.0103455
P48307	TFPI2	1.21294	Up	0.0115077
O60437	PPL	1.21298	Up	0.0118544
P54760	EPHB4	1.21299	Up	2.43554e-05
Q9UFN0	NIPSNAP3A	1.21313	Up	0.0278299
Q7Z7N9	TMEM179B	1.21336	Up	0.00103456
Q8IZ52	CHPF	1.21343	Up	0.00926564
Q9H501	ESF1	1.2135	Up	0.000161197
P00367	GLUD1	1.21356	Up	0.000250462
Q15233	NONO	1.2137	Up	4.90075e-05
Q9NVV0	TMEM38B	1.21374	Up	0.00449839
Q9Y2W2	WBP11	1.21385	Up	3.56824e-05
Q9NQT5	EXOSC3	1.21391	Up	0.00132182
Q96FZ7	CHMP6	1.21401	Up	0.00399894
O94923	GLCE	1.21416	Up	0.0318419
Q16795	NDUFA9	1.21432	Up	0.00719269
O43143	DHX15	1.21452	Up	0.00176892
Q9H160	ING2	1.21456	Up	0.00914723
P16278	GLB1	1.21495	Up	0.000549267
Q9NVA1	UQCC1	1.215	Up	0.00565685
O14828	SCAMP3	1.21503	Up	0.0019576
O15400	STX7	1.21513	Up	0.00192895
P43304	GPD2	1.21549	Up	0.00152553
Q9UIS9	MBD1	1.21566	Up	0.0222195
Q13427	PPIG	1.21588	Up	0.0158793
Q6NW34	NEPRO	1.21591	Up	0.00103393
O75151	PHF2	1.21593	Up	0.000830894
Q9Y4P3	TBL2	1.21597	Up	0.000269367
Q8NBL1	POGLUT1	1.21608	Up	0.000259933
P78316	NOP14	1.21656	Up	0.00053414
Q10587	TEF	1.21666	Up	0.0282272
Q9NY93	DDX56	1.21686	Up	0.000242538
O94992	HEXIM1	1.21715	Up	0.000210005
Q9NTI5	PDS5B	1.2172	Up	0.00380362
Q86X95	CIR1	1.21731	Up	0.000434171
Q01780	EXOSC10	1.21737	Up	5.41448e-06
Q9BXY0	MAK16	1.21749	Up	0.0213555
O43290	SART1	1.2176	Up	0.0013541
Q9UER7	DAXX	1.21789	Up	3.29937e-05
Q9H7B2	RPF2	1.21797	Up	0.00566161
O75955	FLOT1	1.21801	Up	0.000121541
Q16880	UGT8	1.21812	Up	0.000749271
P09651	HNRNPA1	1.21812	Up	3.11591e-06
O15042	U2SURP	1.21812	Up	0.00178693
Q07021	C1QBP	1.21814	Up	5.6534e-05
Q9NZ01	TECR	1.21849	Up	0.000103448
Q96BY9	SARAF	1.21851	Up	0.0185473
Q14739	LBR	1.21852	Up	0.00219656
Q86UL3	GPAT4	1.21871	Up	0.000360222
Q6I9Y2	THOC7	1.21872	Up	0.000778603
Q9BTX1	NDC1	1.21874	Up	0.0108988
Q9UBX3	SLC25A10	1.21878	Up	0.00206134
Q9NRK6	ABCB10	1.21881	Up	0.000538544
Q9Y3T9	NOC2L	1.21883	Up	0.000567191
Q13751	LAMB3	1.21907	Up	0.000433543
Q9BTV4	TMEM43	1.21919	Up	4.59802e-06
O75093	SLIT1	1.21921	Up	3.33003e-05
Q9H3P2	NELFA	1.21931	Up	0.0039451
O60488	ACSL4	1.21937	Up	0.000456705
Q9NUJ1	ABHD10	1.2194	Up	0.00126642
Q969V5	MUL1	1.21942	Up	0.00200228
Q5JTH9	RRP12	1.21982	Up	2.28914e-05
Q9HC07	TMEM165	1.21983	Up	0.00383906
P99999	CYCS	1.21987	Up	0.00074808
Q02809	PLOD1	1.21992	Up	3.98691e-05
Q13523	PRPF4B	1.22001	Up	0.000350821
O75907	DGAT1	1.22009	Up	0.000906375
O15382	BCAT2	1.22015	Up	7.13163e-05
O60264	SMARCA5	1.22027	Up	0.00253246
P19256	CD58	1.22033	Up	0.00128862
Q96GQ7	DDX27	1.22046	Up	0.00071016
Q8N6L1	KRTCAP2	1.22046	Up	0.0323674
Q6SJ96	TBPL2	1.22056	Up	0.0277098
Q8WVC0	LEO1	1.22068	Up	0.00137423
P22087	FBL	1.2207	Up	0.00377743
P17098	ZNF8	1.22099	Up	0.0480416
Q9Y5U4	INSIG2	1.22103	Up	0.00252953
O00264	PGRMC1	1.22119	Up	9.5262e-05
O95983	MBD3	1.22155	Up	0.00206894
Q96G23	CERS2	1.2217	Up	0.000177724
Q9UQ35	SRRM2	1.22187	Up	0.00325319
Q70UQ0	IKBIP	1.22193	Up	0.00330291
P00167	CYB5A	1.222	Up	3.10838e-06
Q06265	EXOSC9	1.22211	Up	0.00728555
Q8IY95	TMEM192	1.22229	Up	0.000328384
Q7Z589	EMSY	1.22258	Up	0.000218575
Q9NUU6	OTULINL	1.22261	Up	0.000431847
Q13217	DNAJC3	1.22282	Up	0.00103972
P12956	XRCC6	1.22286	Up	5.36926e-05
P24539	ATP5PB	1.22307	Up	0.000152711
Q9BT09	CNPY3	1.22307	Up	5.79202e-06
Q2TAY7	SMU1	1.22333	Up	0.00145432
O75390	CS	1.22335	Up	8.69267e-06
Q96B77	TMEM186	1.22353	Up	1.29701e-05
Q96DF8	ESS2	1.22359	Up	0.000949692
Q93100	PHKB	1.22362	Up	0.00026382
P14859	POU2F1	1.22382	Up	0.00300279
Q9BRD0	BUD13	1.22386	Up	0.000181249
Q96KM6	ZNF512B	1.22401	Up	0.00120123
Q8IWX8	CHERP	1.22416	Up	2.60609e-07
Q6P1Q0	LETMD1	1.2245	Up	0.000399364
Q96DA6	DNAJC19	1.22462	Up	0.0040882
Q8NFC6	BOD1L1	1.22471	Up	1.59106e-05
P49116	NR2C2	1.22473	Up	0.000156455
Q8TB22	SPATA20	1.22476	Up	0.000195134
Q9H9B4	SFXN1	1.22483	Up	0.00206642
Q9BU23	LMF2	1.2251	Up	0.00196984
Q96AA3	RFT1	1.22532	Up	3.37605e-05
Q9NXU5	ARL15	1.22534	Up	0.0121524
Q9UHC9	NPC1L1	1.22566	Up	0.00536707
Q13868	EXOSC2	1.22572	Up	4.51393e-05
Q14839	CHD4	1.22578	Up	0.00014583
Q9BZF1	OSBPL8	1.22588	Up	0.000584946
Q9BV38	WDR18	1.22589	Up	0.000100091
Q15717	ELAVL1	1.22595	Up	0.00361137
Q9NWB6	ARGLU1	1.226	Up	0.00771462
O15270	SPTLC2	1.2261	Up	0.000448898
Q6PK04	CCDC137	1.22614	Up	3.19664e-05
P04844	RPN2	1.22632	Up	0.00170473
P42167	TMPO	1.2264	Up	0.000396397
Q7Z2T5	TRMT1L	1.2264	Up	7.93344e-05
P25445	FAS	1.22644	Up	0.00283221
P56134	ATP5MF	1.22656	Up	0.0348674
Q99547	MPHOSPH6	1.22658	Up	3.08869e-05
Q8NCN5	PDPR	1.2267	Up	0.00200746
Q71UI9	H2AZ2	1.22697	Up	0.00400037
Q9UH17	APOBEC3B	1.22697	Up	0.0247241
Q9HD45	TM9SF3	1.2273	Up	0.00138473
Q16891	IMMT	1.22771	Up	0.00611418
O94842	TOX4	1.22772	Up	0.000472863
Q14318	FKBP8	1.22775	Up	0.00165241
Q9C0J8	WDR33	1.22776	Up	4.05244e-05
Q9H3K2	GHITM	1.2278	Up	0.00161312
O15347	HMGB3	1.22783	Up	0.000843561
Q96JB5	CDK5RAP3	1.22784	Up	7.61874e-05
O76024	WFS1	1.22791	Up	3.04514e-05
P55081	MFAP1	1.22832	Up	0.000392764
P53701	HCCS	1.2285	Up	0.000899149
O14662	STX16	1.22879	Up	0.00205902
P09914	IFIT1	1.22887	Up	0.001067
O43464	HTRA2	1.22894	Up	0.000841885
Q9H6R6	ZDHHC6	1.22894	Up	0.000342356
Q9BQ39	DDX50	1.22912	Up	7.65037e-05
Q14257	RCN2	1.22922	Up	3.0926e-05
Q13586	STIM1	1.22926	Up	8.34112e-06
Q7KYR7	BTN2A1	1.2294	Up	0.000401766
Q92930	RAB8B	1.22954	Up	0.00110244
P52272	HNRNPM	1.22958	Up	0.00179859
Q10469	MGAT2	1.22975	Up	0.000103741
Q9NZ45	CISD1	1.22978	Up	9.07137e-05
Q7KZN9	COX15	1.22987	Up	0.00718084
Q8N129	CNPY4	1.22996	Up	0.000159742
Q9NVP1	DDX18	1.23026	Up	0.000713392
Q8NEY8	PPHLN1	1.23068	Up	0.0054584
Q53S08	RAB6D	1.2307	Up	0.000699713
P62314	SNRPD1	1.23105	Up	5.02802e-05
Q92545	TMEM131	1.23117	Up	0.000246022
Q5VT52	RPRD2	1.23124	Up	0.000107311
P11498	PC	1.23125	Up	0.000146707
Q8NBU5	ATAD1	1.23134	Up	0.0022808
Q9ULJ8	PPP1R9A	1.23146	Up	0.0242558
Q96PV6	LENG8	1.23156	Up	0.00481907
P56385	ATP5ME	1.23161	Up	0.000115631
Q86U86	PBRM1	1.23165	Up	0.000529031
Q9HAJ7	SAP30L	1.23213	Up	0.00100089
Q969W1	ZDHHC16	1.23222	Up	0.0451207
P46977	STT3A	1.23233	Up	0.0151579
O75152	ZC3H11A	1.23235	Up	0.000261443
Q12999	TSPAN31	1.23254	Up	0.014347
Q9ULU4	ZMYND8	1.23274	Up	0.000551515
P08174	CD55	1.23315	Up	0.00236745
Q8N697	SLC15A4	1.23319	Up	0.000137465
Q9BQE5	APOL2	1.23361	Up	0.00461358
Q96EZ8	MCRS1	1.23363	Up	0.00141272
Q9Y2P8	RCL1	1.23371	Up	6.53942e-05
P49748	ACADVL	1.23377	Up	0.000156729
Q5VZF2	MBNL2	1.23387	Up	0.00889798
Q03519	TAP2	1.23388	Up	0.00153127
Q9H2K0	MTIF3	1.23412	Up	0.00390057
O60637	TSPAN3	1.23437	Up	0.00252736
Q15061	WDR43	1.2346	Up	0.00596668
Q86VM9	ZC3H18	1.23461	Up	8.72957e-05
Q9Y6D0	SELENOK	1.23473	Up	0.00655872
Q8N684	CPSF7	1.23487	Up	0.000392014
Q9UPP1	PHF8	1.23502	Up	0.0246823
Q6PD62	CTR9	1.23507	Up	0.000148287
Q9UKJ3	GPATCH8	1.23508	Up	0.00787503
Q8IWA0	WDR75	1.23508	Up	0.0379427
Q96E39	RBMXL1	1.23554	Up	0.00101296
O14979	HNRNPDL	1.23585	Up	0.0144756
Q00059	TFAM	1.23652	Up	0.000619462
Q4VC31	MIX23	1.23652	Up	0.00249443
Q8N183	NDUFAF2	1.23662	Up	0.000159403
Q92828	CORO2A	1.23682	Up	0.000114228
P27144	AK4	1.23694	Up	0.000304853
Q96PC5	MIA2	1.23703	Up	0.000214966
O96000	NDUFB10	1.2372	Up	0.000303914
P13674	P4HA1	1.23736	Up	6.47415e-06
B0YJ81	HACD1	1.23752	Up	0.00249812
Q14690	PDCD11	1.23774	Up	0.000154608
Q16777	H2AC20	1.23775	Up	0.0100906
P05026	ATP1B1	1.23786	Up	0.00115556
Q9NQG5	RPRD1B	1.23798	Up	0.000279592
Q8NCS4	TMEM35B	1.238	Up	0.00357667
Q09028	RBBP4	1.23803	Up	0.000765616
Q8N766	EMC1	1.23821	Up	0.001802
Q9Y241	HIGD1A	1.23827	Up	0.000750593
Q9C005	DPY30	1.23836	Up	0.00476725
Q8N5W9	RFLNB	1.23869	Up	0.014402
Q9P2N5	RBM27	1.2387	Up	3.5711e-05
Q9P0K7	RAI14	1.23873	Up	0.000390231
Q9P2R7	SUCLA2	1.2388	Up	0.000135434
Q9NS93	TM7SF3	1.2388	Up	0.00256819
P20020	ATP2B1	1.23906	Up	0.000132338
Q15696	ZRSR2	1.23934	Up	0.0155873
Q96T37	RBM15	1.23938	Up	0.000825205
Q5TGZ0	MICOS10	1.23943	Up	0.0124387
Q9Y3D7	PAM16	1.23978	Up	0.000533848
P34059	GALNS	1.23991	Up	0.000471253
Q9UHL4	DPP7	1.24025	Up	0.00948412
Q6KC79	NIPBL	1.24025	Up	0.00063584
Q8NBS9	TXNDC5	1.24027	Up	6.27844e-05
P43897	TSFM	1.24036	Up	0.00139202
Q9P0M6	MACROH2A2	1.24042	Up	0.0100742
Q9NQ55	PPAN	1.24042	Up	0.000979842
P35232	PHB1	1.24111	Up	0.00273005
Q9UH62	ARMCX3	1.24121	Up	0.000843043
P50454	SERPINH1	1.24126	Up	7.00922e-06
Q9C0E8	LNPK	1.24148	Up	0.000278122
Q9Y3C1	NOP16	1.2416	Up	0.00465131
Q6PJT7	ZC3H14	1.24168	Up	0.00399023
Q5VTE6	ANGEL2	1.24179	Up	0.0106788
Q12907	LMAN2	1.2419	Up	0.000309055
Q9Y385	UBE2J1	1.24198	Up	0.000198522
Q96I99	SUCLG2	1.24236	Up	0.000752194
O43395	PRPF3	1.24241	Up	3.39273e-06
Q96KA5	CLPTM1L	1.24241	Up	0.000342713
Q9Y2H6	FNDC3A	1.24259	Up	0.00151977
Q13505	MTX1	1.24264	Up	0.000496125
Q15269	PWP2	1.24265	Up	0.00267392
Q13123	IK	1.24267	Up	0.000414964
Q9NQG1	MANBAL	1.24279	Up	0.0186978
Q9Y3B9	RRP15	1.24283	Up	0.000120571
P48995	TRPC1	1.24287	Up	0.00733911
O43809	NUDT21	1.24329	Up	1.53099e-05
O94776	MTA2	1.24331	Up	8.88541e-06
Q5SWX8	ODR4	1.24375	Up	0.000243994
Q9BUQ8	DDX23	1.24383	Up	2.76695e-06
Q96PU4	UHRF2	1.2439	Up	5.23506e-05
P16615	ATP2A2	1.24412	Up	0.00275742
Q4G176	ACSF3	1.24422	Up	0.000109542
Q12996	CSTF3	1.24423	Up	0.000298147
P18583	SON	1.2444	Up	0.0130773
Q9NV96	TMEM30A	1.2446	Up	1.989e-05
Q9NX58	LYAR	1.24467	Up	0.000477444
Q8TF68	ZNF384	1.24468	Up	0.00424935
Q9NW13	RBM28	1.24495	Up	0.00154123
Q13636	RAB31	1.24503	Up	0.00658811
P30837	ALDH1B1	1.24505	Up	2.69532e-05
Q15427	SF3B4	1.24539	Up	0.00999432
Q9H4I3	TRABD	1.24543	Up	0.00623307
Q6K0P9	PYHIN1	1.24549	Up	0.00144696
P28799	GRN	1.24553	Up	0.000682803
P05204	HMGN2	1.24595	Up	0.00492547
Q9NX00	TMEM160	1.24597	Up	0.00472441
Q13454	TUSC3	1.24647	Up	0.00398731
P22626	HNRNPA2B1	1.24662	Up	0.00103375
P04181	OAT	1.24676	Up	6.47608e-05
O94880	PHF14	1.24707	Up	5.77362e-05
Q99848	EBNA1BP2	1.24713	Up	0.000707532
Q00978	IRF9	1.24719	Up	5.3764e-05
O95104	SCAF4	1.2472	Up	0.0019832
Q9Y6M5	SLC30A1	1.24748	Up	0.000340377
Q13232	NME3	1.24809	Up	0.000765737
P10253	GAA	1.24819	Up	0.000122889
Q9H0U3	MAGT1	1.2485	Up	5.10017e-05
Q6DD88	ATL3	1.24852	Up	6.91697e-06
P39210	MPV17	1.24855	Up	0.00414451
Q9UJS0	SLC25A13	1.24869	Up	0.000879902
O43826	SLC37A4	1.24871	Up	0.00055002
P0C7P0	CISD3	1.24929	Up	0.0247371
P00533	EGFR	1.2495	Up	0.000104174
P11387	TOP1	1.24952	Up	0.00137363
P43155	CRAT	1.24955	Up	0.00035366
P48723	HSPA13	1.24957	Up	7.26788e-05
Q8IY17	PNPLA6	1.24967	Up	0.000135437
P49590	HARS2	1.24974	Up	7.26656e-05
Q92544	TM9SF4	1.24977	Up	0.000897012
Q15005	SPCS2	1.25037	Up	0.000435856
Q9ULG6	CCPG1	1.25053	Up	0.000330194
Q14643	ITPR1	1.25067	Up	0.000335475
Q9H553	ALG2	1.25089	Up	0.00221354
P19367	HK1	1.25097	Up	0.000790114
Q16594	TAF9	1.251	Up	0.000157939
P17152	TMEM11	1.25103	Up	0.00200543
Q15345	LRRC41	1.25105	Up	4.14069e-05
P10809	HSPD1	1.2511	Up	0.000384437
O43657	TSPAN6	1.25119	Up	3.43217e-05
O95139	NDUFB6	1.25128	Up	0.000386244
Q9UDW1	UQCR10	1.25132	Up	2.48111e-05
Q9BUJ2	HNRNPUL1	1.25142	Up	0.00755199
Q9BXP5	SRRT	1.25149	Up	1.28826e-05
P11169	SLC2A3	1.25155	Up	0.000234537
Q9P2E9	RRBP1	1.25165	Up	0.00111461
Q9UH99	SUN2	1.25172	Up	0.0116554
P51991	HNRNPA3	1.25197	Up	0.00156149
Q8NEJ9	NGDN	1.25199	Up	7.80914e-05
Q9NUT2	ABCB8	1.25291	Up	0.000632696
P51608	MECP2	1.25296	Up	0.000438584
Q9H0A0	NAT10	1.2531	Up	0.000156781
Q92925	SMARCD2	1.25333	Up	2.64667e-06
Q5BJH7	YIF1B	1.25346	Up	0.000586822
A1L0T0	ILVBL	1.25362	Up	0.000220629
Q9UKK6	NXT1	1.2537	Up	0.0133862
Q969N2	PIGT	1.25372	Up	0.000572553
P14927	UQCRB	1.25374	Up	0.00533701
P78381	SLC35A2	1.25377	Up	0.00168885
Q8IXI2	RHOT1	1.25385	Up	0.00075567
Q969M3	YIPF5	1.25403	Up	0.0435648
P08621	SNRNP70	1.25452	Up	0.00024958
Q99623	PHB2	1.25452	Up	0.00129564
Q9GZR7	DDX24	1.25458	Up	0.00172032
Q969E2	SCAMP4	1.25476	Up	0.000517712
Q13547	HDAC1	1.25478	Up	0.0027808
O43818	RRP9	1.25518	Up	0.000257046
O94905	ERLIN2	1.25545	Up	0.00498821
Q5T8P6	RBM26	1.25584	Up	0.000142248
P24752	ACAT1	1.25602	Up	4.67767e-05
Q6P1J9	CDC73	1.25606	Up	6.65403e-05
P14314	PRKCSH	1.25663	Up	0.000267023
Q9BS26	ERP44	1.2567	Up	0.000318492
P04040	CAT	1.25672	Up	2.64508e-05
Q9BSJ8	ESYT1	1.25675	Up	1.4814e-05
P12277	CKB	1.25676	Up	0.000255106
O75880	SCO1	1.25685	Up	0.00634268
Q8N9Z2	CCDC71L	1.25685	Up	0.000610129
Q96N46	TTC14	1.25694	Up	0.000971476
Q15800	MSMO1	1.25702	Up	0.00747762
O60701	UGDH	1.25703	Up	0.000334331
Q13769	THOC5	1.25731	Up	8.16445e-05
Q9NXF1	TEX10	1.25745	Up	0.00152294
O75746	SLC25A12	1.25746	Up	0.00277589
Q13428	TCOF1	1.25776	Up	0.000211687
P17535	JUND	1.25779	Up	0.00373114
Q9UII2	ATP5IF1	1.25798	Up	0.0013437
Q8N5F7	NKAP	1.25807	Up	0.0060844
P61916	NPC2	1.2582	Up	0.00095404
Q9NS69	TOMM22	1.2582	Up	0.00662997
Q9H4E7	DEF6	1.25856	Up	0.000329492
O14776	TCERG1	1.25924	Up	7.115e-05
O75629	CREG1	1.25947	Up	0.00732469
P12235	SLC25A4	1.25984	Up	0.000593778
Q96B26	EXOSC8	1.26002	Up	2.81211e-05
Q13948	CUX1	1.26007	Up	0.000987687
Q9Y221	NIP7	1.2603	Up	0.00123891
P38646	HSPA9	1.26032	Up	0.00144679
Q14244	MAP7	1.26053	Up	0.00380287
Q9BQ48	MRPL34	1.26088	Up	0.00230442
Q8NEF9	SRFBP1	1.26107	Up	2.58926e-05
Q5T0D9	TPRG1L	1.26126	Up	0.000795931
Q8TBA6	GOLGA5	1.26142	Up	0.000409709
P19447	ERCC3	1.26172	Up	0.00070531
Q9H3H5	DPAGT1	1.26173	Up	0.00227554
Q9P035	HACD3	1.26175	Up	0.00175313
Q9BV94	EDEM2	1.26197	Up	0.000905369
Q8TB61	SLC35B2	1.26216	Up	0.00110834
O75683	SURF6	1.26217	Up	0.000345439
Q96S97	MYADM	1.26223	Up	0.025119
Q96CS3	FAF2	1.26277	Up	1.13841e-05
Q9Y3A4	RRP7A	1.26283	Up	8.43895e-05
P31930	UQCRC1	1.2629	Up	0.000165018
Q8NHP8	PLBD2	1.2633	Up	6.64893e-05
Q96LL9	DNAJC30	1.26361	Up	0.0381861
Q7Z6I8	C5orf24	1.26376	Up	0.00366814
Q9NX24	NHP2	1.26421	Up	0.0153852
Q96B45	BORCS7	1.26467	Up	0.00733527
Q15388	TOMM20	1.26473	Up	0.00416592
Q92643	PIGK	1.26477	Up	8.2575e-05
Q53EP0	FNDC3B	1.26491	Up	0.00474698
Q8WYA6	CTNNBL1	1.26493	Up	4.03802e-05
O60279	SUSD5	1.26497	Up	0.000263152
Q96SK2	TMEM209	1.26557	Up	0.00717175
Q0VG06	FAAP100	1.26582	Up	0.0449867
Q9Y2Q3	GSTK1	1.26632	Up	0.000270743
Q9BQ69	MACROD1	1.26632	Up	0.00134294
P22695	UQCRC2	1.26634	Up	0.000764751
O95302	FKBP9	1.26686	Up	1.59517e-05
Q86V35	CABP7	1.26709	Up	0.000262445
O43422	THAP12	1.2671	Up	0.0249006
Q8NBX0	SCCPDH	1.26721	Up	0.000539296
P07711	CTSL	1.26722	Up	4.83405e-06
O60220	TIMM8A	1.26741	Up	0.000679849
P29279	CCN2	1.26746	Up	0.00636247
Q96HR3	MED30	1.26757	Up	1.82841e-05
P19338	NCL	1.26778	Up	0.000342806
Q96JP5	ZFP91	1.26781	Up	4.31055e-05
Q9H7L9	SUDS3	1.26785	Up	0.00340405
Q03188	CENPC	1.26804	Up	8.28944e-05
Q49B96	COX19	1.2681	Up	0.00051583
Q5HYA8	TMEM67	1.26818	Up	0.0195976
Q71RG4	TMUB2	1.26836	Up	0.00183901
O43172	PRPF4	1.26839	Up	0.000397356
O15525	MAFG	1.26863	Up	0.0134303
Q86U38	NOP9	1.26865	Up	0.000933647
P21912	SDHB	1.26874	Up	0.000459557
Q9Y3E1	HDGFL3	1.26891	Up	0.00524178
Q8N5M9	JAGN1	1.2693	Up	0.000543494
Q01484	ANK2	1.26941	Up	0.02257
Q8N2K0	ABHD12	1.26947	Up	0.00226361
Q8IYQ7	THNSL1	1.26959	Up	0.00359108
O43852	CALU	1.26993	Up	5.96721e-05
P49006	MARCKSL1	1.27011	Up	8.00152e-05
Q86UP2	KTN1	1.27011	Up	0.000149394
O14523	C2CD2L	1.27013	Up	0.000103361
Q96ST2	IWS1	1.2705	Up	2.04728e-06
Q9UNX4	WDR3	1.27053	Up	0.00283341
P49759	CLK1	1.27061	Up	0.00663007
Q9BY76	ANGPTL4	1.27074	Up	3.16851e-05
Q02040	AKAP17A	1.27107	Up	0.000825799
Q8IXH7	NELFCD	1.27121	Up	0.00695149
P08579	SNRPB2	1.27161	Up	4.35494e-05
Q12872	SFSWAP	1.27167	Up	5.86572e-07
P27449	ATP6V0C	1.2718	Up	0.00132521
Q9NZC9	SMARCAL1	1.272	Up	0.00402408
Q16854	DGUOK	1.2723	Up	0.000188451
Q9UBW7	ZMYM2	1.2724	Up	0.00015964
P00403	MT-CO2	1.27248	Up	0.00146337
Q5C9Z4	NOM1	1.2728	Up	0.000292595
Q8IXT5	RBM12B	1.27289	Up	0.000307724
Q9NW15	ANO10	1.27312	Up	0.00031403
Q9NPA0	EMC7	1.27312	Up	0.00176059
Q53S58	TMEM177	1.27316	Up	0.000884237
Q9BXP2	SLC12A9	1.2732	Up	0.00694703
O00567	NOP56	1.27354	Up	0.0022063
P35318	ADM	1.27362	Up	0.000559662
P10321	HLA-C	1.27378	Up	6.47025e-05
Q6IAN0	DHRS7B	1.27405	Up	3.07354e-05
Q9P0W2	HMG20B	1.27426	Up	0.00128545
Q02880	TOP2B	1.27435	Up	0.0049567
Q99943	AGPAT1	1.27459	Up	0.000260146
Q96FF9	CDCA5	1.27473	Up	0.000189256
P08648	ITGA5	1.27496	Up	6.17811e-05
Q6P587	FAHD1	1.27496	Up	1.59224e-05
P62805	H4C16	1.27501	Up	0.0309566
Q8TCJ2	STT3B	1.27525	Up	0.0017271
Q6UB35	MTHFD1L	1.27526	Up	9.64963e-06
P08729	KRT7	1.2756	Up	0.0115748
P02462	COL4A1	1.276	Up	1.66913e-05
Q96PK6	RBM14	1.27601	Up	0.000344411
[truncated: 640 more rows]

## Sheet: Λ-IrPPQ-vs-PBS
Accession	Gene Name	FoldChange	Regulation	p-value
Q9NUA8	ZBTB40	0.151395	Down	4.53293e-05
Q9H2J7	SLC6A15	0.263696	Down	1.45783e-05
Q8TBZ2	MYCBPAP	0.266675	Down	9.67619e-05
P0C221	CCDC175	0.27688	Down	1.40695e-05
Q499Z3	SLFNL1	0.295042	Down	8.60452e-06
Q9NXG0	CNTLN	0.318495	Down	1.67891e-06
Q16667	CDKN3	0.323609	Down	4.21639e-05
Q9NRM7	LATS2	0.355659	Down	3.51535e-05
P02795	MT2A	0.356085	Down	0.00144503
Q96I76	GPATCH3	0.379368	Down	5.36842e-05
Q7Z5H4	VN1R5	0.381537	Down	9.04655e-05
O43303	CCP110	0.383687	Down	1.57869e-05
Q06609	RAD51	0.409706	Down	1.39893e-05
Q68DK7	MSL1	0.422782	Down	5.08783e-06
Q6ZR37	PLEKHG7	0.435635	Down	5.4986e-05
P06132	UROD	0.436044	Down	3.00309e-06
O60662	KLHL41	0.457314	Down	2.60817e-06
P17707	AMD1	0.458138	Down	9.49403e-05
O95273	CCNDBP1	0.468618	Down	0.000102588
P61024	CKS1B	0.474487	Down	6.31383e-05
Q9BS18	ANAPC13	0.477018	Down	0.000138518
P07197	NEFM	0.478617	Down	0.000112928
P00374	DHFR	0.490665	Down	1.53055e-06
Q96NZ8	WFIKKN1	0.494704	Down	0.000720629
P80297	MT1X	0.495282	Down	0.00550976
P34913	EPHX2	0.511227	Down	2.24909e-06
Q9Y663	HS3ST3A1	0.512475	Down	1.71127e-05
Q5VZK9	CARMIL1	0.514397	Down	0.000158574
Q96A05	ATP6V1E2	0.514803	Down	0.000368232
Q6EEV4	POLR2M	0.517731	Down	0.0113205
P50579	METAP2	0.519927	Down	7.87743e-08
Q9NZJ6	COQ3	0.531013	Down	0.00026582
Q8WXE9	STON2	0.533978	Down	2.24736e-05
Q86UY6	NAA40	0.541274	Down	0.000130635
Q96P20	NLRP3	0.544715	Down	0.000305344
Q9HCU9	BRMS1	0.551424	Down	0.000112266
O14907	TAX1BP3	0.553007	Down	2.93652e-05
Q96PM5	RCHY1	0.557961	Down	0.00272677
Q9Y316	MEMO1	0.564352	Down	2.53646e-05
Q9BV57	ADI1	0.570765	Down	3.6749e-06
P35670	ATP7B	0.576012	Down	0.00743199
Q9NUQ2	AGPAT5	0.576756	Down	7.85661e-05
Q9P021	CRIPT	0.578206	Down	0.000101093
P08243	ASNS	0.578804	Down	1.16188e-05
Q14135	VGLL4	0.581575	Down	0.00426737
Q09328	MGAT5	0.582963	Down	3.28456e-05
Q969E8	TSR2	0.583877	Down	8.19343e-05
P50461	CSRP3	0.584595	Down	0.000291678
Q9NYT0	PLEK2	0.584668	Down	9.52412e-06
Q5VST9	OBSCN	0.588273	Down	2.57238e-05
O00189	AP4M1	0.590432	Down	0.000117606
Q8IYB5	SMAP1	0.590812	Down	6.70805e-06
Q9BZL1	UBL5	0.591824	Down	2.98118e-05
P06331	IGHV4-34	0.595534	Down	9.5679e-05
Q14019	COTL1	0.598183	Down	0.000116581
Q9H900	ZWILCH	0.598526	Down	1.27028e-05
Q15004	PCLAF	0.598897	Down	6.82186e-07
P49588	AARS1	0.600327	Down	1.75566e-05
P54687	BCAT1	0.601565	Down	4.84653e-06
Q9NT62	ATG3	0.602974	Down	1.54459e-05
Q9BTE6	AARSD1	0.603137	Down	5.51889e-06
Q9HBG6	IFT122	0.603471	Down	0.00245001
Q9NRN9	METTL5	0.605716	Down	6.4275e-06
Q96PU5	NEDD4L	0.606759	Down	7.982e-05
P21291	CSRP1	0.607532	Down	5.64144e-05
Q16831	UPP1	0.610115	Down	0.000117741
Q9NZP5	OR5AC2	0.614125	Down	0.000199602
P50876	RNF144A	0.614387	Down	9.60052e-05
Q8IVM0	CCDC50	0.614467	Down	3.48161e-06
P31350	RRM2	0.615572	Down	3.18179e-07
Q9H2P9	DPH5	0.615702	Down	1.49084e-05
Q9GZP8	IMUP	0.616534	Down	8.98239e-06
Q8WUH1	CHURC1	0.616955	Down	3.13027e-05
P62633	CNBP	0.617744	Down	4.1058e-05
Q14847	LASP1	0.619463	Down	3.22544e-05
Q9Y2S6	TMA7	0.620021	Down	3.6377e-05
Q96KB5	PBK	0.620153	Down	8.12829e-06
Q96F85	CNRIP1	0.620849	Down	3.24526e-05
Q8IUQ4	SIAH1	0.621818	Down	0.00105631
Q9Y217	MTMR6	0.623854	Down	0.000327589
P23409	MYF6	0.624131	Down	0.000115732
P41567	EIF1	0.626182	Down	0.000148462
P0C7T5	ATXN1L	0.626208	Down	8.51774e-05
Q9NWQ9	C14orf119	0.626208	Down	5.28978e-05
P33552	CKS2	0.626287	Down	1.56064e-05
Q96D46	NMD3	0.626366	Down	1.30942e-05
Q8N999	C12orf29	0.627371	Down	0.000338899
Q6P9B6	MEAK7	0.627559	Down	6.33473e-05
O94952	FBXO21	0.627975	Down	0.000363922
P49773	HINT1	0.628126	Down	0.000109806
Q9UPR0	PLCL2	0.628412	Down	7.27281e-05
O43847	NRDC	0.628831	Down	4.02555e-05
Q8IYA2	CCDC144CP	0.628861	Down	0.0002566
P62993	GRB2	0.630982	Down	4.3346e-05
Q9BZX2	UCK2	0.631211	Down	3.37631e-05
Q15785	TOMM34	0.63165	Down	5.22278e-05
P62495	ETF1	0.632092	Down	1.53595e-05
Q8TCF1	ZFAND1	0.632326	Down	1.47098e-05
P49591	SARS1	0.634114	Down	2.74712e-05
Q9NPD8	UBE2T	0.634202	Down	2.38046e-05
Q8IX90	SKA3	0.634332	Down	0.000415907
Q9Y303	AMDHD2	0.635473	Down	4.02154e-06
Q9BZQ8	NIBAN1	0.635767	Down	0.000135966
O00625	PIR	0.636514	Down	2.7518e-05
Q9H3K6	BOLA2B	0.637192	Down	0.000167457
P30613	PKLR	0.637674	Down	0.00512586
P35754	GLRX	0.638017	Down	4.36725e-05
O00762	UBE2C	0.638041	Down	1.8821e-06
Q9BV44	THUMPD3	0.638094	Down	9.15896e-06
Q8TCG1	CIP2A	0.638303	Down	1.22959e-06
O60869	EDF1	0.638465	Down	4.77558e-05
Q9UI30	TRMT112	0.638622	Down	9.06622e-07
Q7Z4H3	HDDC2	0.639152	Down	2.72277e-05
P53611	RABGGTB	0.639945	Down	0.000136212
Q9H788	SH2D4A	0.640629	Down	5.72431e-05
Q13951	CBFB	0.641605	Down	2.09488e-05
P51797	CLCN6	0.641645	Down	0.000411342
P51965	UBE2E1	0.642484	Down	7.59357e-05
Q9BT23	LIMD2	0.642673	Down	0.00237558
Q9Y3D8	AK6	0.642973	Down	5.08652e-05
Q8NB16	MLKL	0.643582	Down	1.39191e-05
O96007	MOCS2	0.643884	Down	4.03214e-05
Q9H773	DCTPP1	0.646577	Down	7.85082e-05
Q8TDY2	RB1CC1	0.647073	Down	6.39891e-05
P27986	PIK3R1	0.64724	Down	0.0310304
Q15036	SNX17	0.647252	Down	3.35893e-06
Q15796	SMAD2	0.64751	Down	0.000788263
Q92540	SMG7	0.647628	Down	1.90932e-06
P13693	TPT1	0.647908	Down	4.00475e-05
P43487	RANBP1	0.647942	Down	6.335e-05
Q9NX52	RHBDL2	0.648159	Down	0.00142957
Q15645	TRIP13	0.648588	Down	6.54299e-06
Q96LD8	SENP8	0.648655	Down	2.74597e-06
A6NHL2	TUBAL3	0.649063	Down	0.000314618
P20290	BTF3	0.649836	Down	4.52906e-07
P68104	EEF1A1	0.649969	Down	3.50153e-05
Q13158	FADD	0.650258	Down	6.74953e-05
Q9NR12	PDLIM7	0.65056	Down	1.56451e-05
Q9Y617	PSAT1	0.650997	Down	3.1745e-05
P41227	NAA10	0.651137	Down	5.73792e-05
Q13765	NACA	0.651622	Down	0.000135546
Q9BW83	IFT27	0.651805	Down	0.000159829
Q9BY32	ITPA	0.65244	Down	0.000247188
Q9NQH7	XPNPEP3	0.652518	Down	1.72049e-05
P26639	TARS1	0.652873	Down	4.1342e-05
P84101	SERF2	0.652966	Down	0.000787866
O75347	TBCA	0.653345	Down	0.000154871
Q86X83	COMMD2	0.654023	Down	0.00127701
Q9UK76	JPT1	0.654204	Down	7.836e-06
Q14247	CTTN	0.654372	Down	1.08846e-05
Q8TCA0	LRRC20	0.654687	Down	9.03832e-07
O43542	XRCC3	0.655263	Down	0.000167175
P58546	MTPN	0.656027	Down	0.000239249
P55209	NAP1L1	0.656169	Down	9.18357e-05
P46776	RPL27A	0.656662	Down	0.0042907
Q9Y478	PRKAB1	0.65689	Down	0.00401126
O75534	CSDE1	0.657169	Down	1.48549e-05
O95749	GGPS1	0.657885	Down	0.00050683
P62857	RPS28	0.658304	Down	0.00025291
Q8WUX2	CHAC2	0.658452	Down	0.000168588
O96033	MOCS2	0.658846	Down	0.000933182
Q9BPZ3	PAIP2	0.659014	Down	7.45005e-05
Q9NX55	HYPK	0.659039	Down	1.91003e-05
Q96RR1	TWNK	0.659647	Down	0.0018693
Q9UPQ9	TNRC6B	0.660146	Down	0.00629305
Q8WTS6	SETD7	0.660723	Down	9.04587e-05
O75822	EIF3J	0.660871	Down	7.35902e-05
Q99439	CNN2	0.661017	Down	5.52814e-05
Q16222	UAP1	0.661173	Down	6.24466e-06
O95989	NUDT3	0.661326	Down	0.000101647
Q9HCE0	EPG5	0.661564	Down	0.000296906
P36969	GPX4	0.661647	Down	2.39299e-05
Q13257	MAD2L1	0.661809	Down	0.000391806
Q99615	DNAJC7	0.662034	Down	1.15369e-05
P13639	EEF2	0.662086	Down	1.38552e-05
O14602	EIF1AY	0.662184	Down	6.507e-05
O94804	STK10	0.662393	Down	1.15696e-06
P60866	RPS20	0.662433	Down	0.000513243
P46926	GNPDA1	0.662554	Down	7.07999e-05
Q9Y237	PIN4	0.66271	Down	2.54267e-06
Q99961	SH3GL1	0.663809	Down	2.52618e-05
P30041	PRDX6	0.663958	Down	0.00589218
Q92747	ARPC1A	0.664071	Down	0.00977701
Q969G6	RFK	0.665584	Down	7.67617e-05
Q969T4	UBE2E3	0.666057	Down	0.000175302
Q9H8M7	MINDY3	0.666588	Down	0.000194607
Q7L2H7	EIF3M	0.666978	Down	0.000273896
Q96IK1	BOD1	0.667096	Down	0.00102183
Q9Y239	NOD1	0.667105	Down	5.91515e-05
Q9BPY3	FAM118B	0.667253	Down	0.000223052
P63241	EIF5A	0.667449	Down	4.7607e-05
Q9Y3A5	SBDS	0.667591	Down	5.84887e-05
Q6ZT21	TMPPE	0.668692	Down	0.00366263
P22102	GART	0.669479	Down	1.94041e-05
O00571	DDX3X	0.669508	Down	3.40421e-05
P12429	ANXA3	0.66989	Down	8.34593e-05
P05386	RPLP1	0.670051	Down	0.000168043
P02647	APOA1	0.670328	Down	0.0084583
P19623	SRM	0.670359	Down	2.83926e-05
Q9NRN7	AASDHPPT	0.67044	Down	2.20008e-05
Q12933	TRAF2	0.670449	Down	2.69346e-05
Q9BW66	CINP	0.670663	Down	0.00518035
Q12894	IFRD2	0.670668	Down	0.00103444
Q9H4H8	FAM83D	0.670824	Down	0.000201365
O14530	TXNDC9	0.671179	Down	8.90756e-05
P49642	PRIM1	0.671286	Down	4.23798e-06
Q9Y3C8	UFC1	0.67139	Down	2.06811e-05
P24534	EEF1B2	0.671528	Down	5.63608e-05
Q96AT9	RPE	0.671595	Down	0.000860376
P60983	GMFB	0.671649	Down	0.000112286
Q96BD8	SKA1	0.672123	Down	0.00200726
Q92882	OSTF1	0.67257	Down	0.0023397
Q99622	C12orf57	0.673029	Down	0.000152823
Q9Y6T7	DGKB	0.673413	Down	0.000562105
Q0VDG4	SCRN3	0.673425	Down	0.000304222
P56945	BCAR1	0.673561	Down	3.77546e-06
Q8IVH8	MAP4K3	0.674547	Down	0.000493012
Q9NPH0	ACP6	0.674547	Down	0.000493012
Q7L1Q6	BZW1	0.674575	Down	2.10391e-05
P0C7P3	SLFN14	0.675108	Down	4.92142e-06
Q9BRA2	TXNDC17	0.675209	Down	0.000416965
P46734	MAP2K3	0.675237	Down	1.43651e-05
P26641	EEF1G	0.675256	Down	7.43604e-06
Q9NWT6	HIF1AN	0.675347	Down	9.2777e-05
P46779	RPL28	0.676494	Down	0.00127337
O00299	CLIC1	0.676673	Down	0.000241736
Q15382	RHEB	0.676677	Down	1.52716e-05
P07737	PFN1	0.676826	Down	0.000422557
Q96P70	IPO9	0.677292	Down	5.56188e-05
Q9HA64	FN3KRP	0.678067	Down	1.92016e-05
Q6P5R6	RPL22L1	0.678257	Down	6.98991e-05
P68036	UBE2L3	0.678498	Down	0.000142388
O60493	SNX3	0.678591	Down	9.18516e-07
Q14644	RASA3	0.679056	Down	1.15391e-05
P06493	CDK1	0.679122	Down	1.64857e-05
O95801	TTC4	0.679386	Down	1.11134e-05
P60842	EIF4A1	0.679391	Down	1.72614e-05
O60678	PRMT3	0.679543	Down	4.23842e-06
Q9NRM2	ZNF277	0.679788	Down	0.00269413
Q9H1Y0	ATG5	0.680085	Down	2.63356e-05
Q01995	TAGLN	0.680357	Down	6.7509e-06
Q8N9N8	EIF1AD	0.680498	Down	5.28927e-05
Q14493	SLBP	0.680687	Down	6.91894e-05
O60234	GMFG	0.68088	Down	0.000167895
Q8TEL6	TRPC4AP	0.680899	Down	6.50245e-05
Q6ZWJ1	STXBP4	0.680989	Down	7.0979e-05
Q9UK97	FBXO9	0.68116	Down	4.50939e-05
P0C2W1	FBXO45	0.681164	Down	0.000283497
P46934	NEDD4	0.681379	Down	1.62931e-05
P36639	NUDT1	0.681661	Down	4.36198e-06
P50395	GDI2	0.681702	Down	7.11788e-05
P25398	RPS12	0.681896	Down	0.000150605
P68366	TUBA4A	0.681899	Down	0.000743486
Q8N0X7	SPART	0.682031	Down	1.02293e-06
P83881	RPL36A	0.68243	Down	0.000419186
P14921	ETS1	0.682512	Down	2.6022e-05
Q96C90	PPP1R14B	0.684151	Down	0.000216668
P11802	CDK4	0.68417	Down	2.78381e-05
Q9P2Q2	FRMD4A	0.684363	Down	0.000131894
Q9UHY7	ENOPH1	0.684385	Down	2.40164e-05
Q9UKY7	CDV3	0.684418	Down	0.000214439
Q14192	FHL2	0.685178	Down	0.000241559
Q9P000	COMMD9	0.685702	Down	0.00136465
P23528	CFL1	0.685997	Down	0.000278203
Q6ZNJ1	NBEAL2	0.686304	Down	0.000812357
P61221	ABCE1	0.686356	Down	2.05677e-05
P17174	GOT1	0.686406	Down	7.62216e-05
P50452	SERPINB8	0.686567	Down	4.57042e-05
Q96EF6	FBXO17	0.686585	Down	0.000190462
P83731	RPL24	0.686775	Down	0.00107208
Q9UHD1	CHORDC1	0.68678	Down	0.00033402
P47813	EIF1AX	0.687259	Down	0.000670999
P04080	CSTB	0.68735	Down	0.000106587
O75223	GGCT	0.68744	Down	2.32967e-05
Q9GZZ1	NAA50	0.687854	Down	7.54855e-06
O75153	CLUH	0.687866	Down	1.37059e-05
Q9BQE3	TUBA1C	0.688219	Down	1.32837e-05
Q8TB24	RIN3	0.688965	Down	0.000119113
Q9H5X1	CIAO2A	0.689185	Down	0.000307185
Q13630	GFUS	0.68923	Down	0.00038062
Q96KP4	CNDP2	0.689303	Down	8.85435e-07
P35219	CA8	0.689512	Down	0.000245688
Q96LR5	UBE2E2	0.68952	Down	8.1903e-06
Q9NUP9	LIN7C	0.689594	Down	2.78858e-06
P54577	YARS1	0.689849	Down	7.8302e-05
Q13642	FHL1	0.690041	Down	0.000139683
Q16878	CDO1	0.690151	Down	0.00402178
Q13489	BIRC3	0.690173	Down	0.00117928
Q13671	RIN1	0.690309	Down	6.27765e-05
P16949	STMN1	0.690476	Down	0.000109928
P23921	RRM1	0.690747	Down	2.45232e-05
P27635	RPL10	0.691119	Down	0.000138274
Q3KRA6	C2orf76	0.691837	Down	0.000774353
Q6P4I2	WDR73	0.691925	Down	0.000440397
Q13325	IFIT5	0.692225	Down	0.000393111
Q96IZ0	PAWR	0.692684	Down	9.51672e-05
Q9NZL4	HSPBP1	0.692836	Down	0.000185161
P04818	TYMS	0.692854	Down	1.82868e-05
Q5T5Y3	CAMSAP1	0.693392	Down	2.64114e-05
Q9BVV6	KIAA0586	0.693426	Down	1.18415e-05
P42574	CASP3	0.693463	Down	0.0025163
P14735	IDE	0.69356	Down	7.54818e-06
Q9Y6A5	TACC3	0.693934	Down	2.02134e-05
P23588	EIF4B	0.694502	Down	4.97733e-05
Q15942	ZYX	0.694575	Down	2.90365e-05
P52565	ARHGDIA	0.694797	Down	0.000184357
P29692	EEF1D	0.694872	Down	5.0234e-05
Q9H0R4	HDHD2	0.694877	Down	9.13161e-05
P51692	STAT5B	0.694882	Down	5.61999e-05
P13797	PLS3	0.69502	Down	2.36286e-05
Q9Y5X2	SNX8	0.695394	Down	9.30475e-05
Q9P0P0	RNF181	0.695441	Down	0.00050776
O00410	IPO5	0.695465	Down	1.86899e-05
Q9NZD8	SPG21	0.695536	Down	0.00181158
P50502	ST13	0.695611	Down	3.64586e-05
Q7Z7E8	UBE2Q1	0.695664	Down	6.682e-05
Q5VW36	FOCAD	0.695729	Down	4.90459e-05
O95684	CEP43	0.695745	Down	7.52441e-05
Q9H0J9	PARP12	0.69575	Down	0.000113044
O60271	SPAG9	0.695785	Down	1.06782e-05
P61927	RPL37	0.695788	Down	0.00030459
O43665	RGS10	0.695894	Down	8.30615e-05
Q6NXE6	ARMC6	0.695971	Down	5.54678e-05
P63244	RACK1	0.696037	Down	3.51252e-05
P62851	RPS25	0.696301	Down	2.66461e-05
Q8TCT8	SPPL2A	0.696337	Down	0.0477069
Q9Y266	NUDC	0.69665	Down	0.000190474
Q9GZN8	C20orf27	0.696835	Down	0.000424693
P08865	RPSA	0.696968	Down	3.42882e-05
Q9BUB4	ADAT1	0.697228	Down	0.0170792
Q8TC05	MDM1	0.697283	Down	0.0022053
Q14790	CASP8	0.697299	Down	8.20967e-05
Q9Y3F4	STRAP	0.697467	Down	4.4638e-05
Q16763	UBE2S	0.697636	Down	5.92171e-06
P31751	AKT2	0.697875	Down	0.000153537
Q8IWB9	TEX2	0.698123	Down	0.000242878
P05388	RPLP0	0.698146	Down	3.52487e-05
Q9UMR2	DDX19B	0.698433	Down	0.00252777
P60002	ELOF1	0.69848	Down	0.0150921
Q14444	CAPRIN1	0.698488	Down	2.28471e-05
Q92539	LPIN2	0.698489	Down	0.00197468
P22392	NME2	0.698522	Down	0.000170942
P18077	RPL35A	0.698614	Down	0.000236747
Q96R06	SPAG5	0.698643	Down	2.67935e-05
Q96HC4	PDLIM5	0.698756	Down	4.66952e-06
Q8WUA8	TSKU	0.699014	Down	0.0264386
P12081	HARS1	0.699179	Down	6.68236e-05
Q9NRR3	CDC42SE2	0.699188	Down	6.49045e-05
P07951	TPM2	0.699214	Down	0.000115863
O43310	CTIF	0.69924	Down	0.000316522
Q96GA3	LTV1	0.699292	Down	7.54837e-05
Q9NVM4	PRMT7	0.699654	Down	0.000319649
Q86VN1	VPS36	0.700123	Down	0.000112192
Q9BVQ7	SPATA5L1	0.700241	Down	0.000319385
Q9HAV4	XPO5	0.700419	Down	0.000170731
Q9Y281	CFL2	0.700553	Down	0.000111939
Q9UBQ5	EIF3K	0.700898	Down	0.000199849
Q14651	PLS1	0.700963	Down	1.24387e-05
O00221	NFKBIE	0.701112	Down	0.000174696
Q99871	HAUS7	0.701112	Down	0.000464058
Q9NZJ9	NUDT4	0.701199	Down	0.000144416
P60981	DSTN	0.701347	Down	0.000230145
Q96H20	SNF8	0.701361	Down	9.76366e-05
Q9HBX8	LGR6	0.701365	Down	0.000189293
Q16644	MAPKAPK3	0.701405	Down	7.2704e-05
Q86YA3	ZGRF1	0.701567	Down	0.000105288
Q9NQW7	XPNPEP1	0.701587	Down	2.77987e-05
Q9NTK5	OLA1	0.702023	Down	2.47555e-05
O15511	ARPC5	0.70218	Down	0.000402702
Q13541	EIF4EBP1	0.702234	Down	0.000496231
P30085	CMPK1	0.702406	Down	5.19427e-05
P40429	RPL13A	0.702623	Down	0.000199172
Q9HB07	MYG1	0.702701	Down	7.31251e-06
P41240	CSK	0.702807	Down	4.31331e-05
Q9BUF5	TUBB6	0.702966	Down	3.19662e-05
Q8TB52	FBXO30	0.702977	Down	0.000515455
Q9H446	RWDD1	0.703281	Down	5.38418e-05
Q86TU7	SETD3	0.703305	Down	6.30708e-05
O75794	CDC123	0.703517	Down	1.9494e-07
P23470	PTPRG	0.703523	Down	0.00389304
Q16626	MEA1	0.703595	Down	7.52841e-05
P62910	RPL32	0.703678	Down	0.000373776
P35080	PFN2	0.703705	Down	0.000141962
Q13115	DUSP4	0.704091	Down	0.000590538
P49593	PPM1F	0.70446	Down	0.000274367
P63313	TMSB10	0.704537	Down	0.000442677
Q7Z422	SZRD1	0.704561	Down	9.63975e-05
P15880	RPS2	0.704625	Down	9.56665e-06
Q9BUL8	PDCD10	0.704654	Down	5.09189e-05
Q12800	TFCP2	0.704659	Down	0.0241288
P63146	UBE2B	0.704817	Down	0.000978976
Q9H4A5	GOLPH3L	0.704962	Down	0.000188534
P60228	EIF3E	0.705032	Down	8.12209e-05
P55060	CSE1L	0.705172	Down	6.56174e-05
Q8TEX9	IPO4	0.705229	Down	0.000308048
Q9UBI1	COMMD3	0.705346	Down	0.000141354
Q96EY9	ADAT3	0.705604	Down	0.000934367
P61247	RPS3A	0.706073	Down	3.31281e-05
Q00169	PITPNA	0.706285	Down	1.01072e-05
Q9Y4C2	TCAF1	0.706382	Down	0.000404051
Q12834	CDC20	0.706503	Down	0.000238262
P53582	METAP1	0.706721	Down	0.000187305
P62081	RPS7	0.706808	Down	0.000319684
O15484	CAPN5	0.707059	Down	0.000143921
P62241	RPS8	0.707455	Down	0.000396103
O95433	AHSA1	0.707486	Down	0.000182
Q7L9L4	MOB1B	0.7076	Down	3.21616e-06
Q16512	PKN1	0.707694	Down	4.16561e-06
Q9Y262	EIF3L	0.707731	Down	0.00010515
Q96AC1	FERMT2	0.707958	Down	1.39613e-05
Q16658	FSCN1	0.708003	Down	1.23574e-05
Q8TER5	ARHGEF40	0.708093	Down	0.000690652
Q15398	DLGAP5	0.708127	Down	2.86184e-06
Q96BI1	SLC22A18	0.708181	Down	0.00028608
P57076	CFAP298	0.708219	Down	0.000123197
P35520	CBS	0.708408	Down	1.88043e-06
Q9Y508	RNF114	0.708489	Down	0.00178607
P09382	LGALS1	0.70849	Down	0.000554925
P56211	ARPP19	0.708497	Down	0.000993992
P15170	GSPT1	0.70881	Down	0.000168828
Q96K17	BTF3L4	0.709136	Down	4.88747e-05
P51580	TPMT	0.709314	Down	0.000213995
Q71U36	TUBA1A	0.709783	Down	0.000236426
Q9BUK6	MSTO1	0.709821	Down	6.1799e-05
Q86WQ0	NR2C2AP	0.709852	Down	2.33953e-05
O60610	DIAPH1	0.70995	Down	3.75371e-05
Q5VZE5	NAA35	0.709952	Down	3.39995e-05
P51452	DUSP3	0.710014	Down	1.22475e-05
Q9H6D7	HAUS4	0.7101	Down	3.28524e-06
P33176	KIF5B	0.71028	Down	4.05863e-05
P62826	RAN	0.710288	Down	0.000392606
Q9Y4E6	WDR7	0.710313	Down	0.000770822
P48507	GCLM	0.710331	Down	0.000188107
Q9H000	MKRN2	0.710375	Down	0.00142474
P30566	ADSL	0.710402	Down	7.67319e-06
Q9NUU7	DDX19A	0.710668	Down	0.000165342
P52306	RAP1GDS1	0.710753	Down	4.30668e-05
P62273	RPS29	0.71087	Down	0.00153316
Q9Y547	HSPB11	0.710947	Down	3.70937e-05
Q969U7	PSMG2	0.711198	Down	0.00010727
Q6FI81	CIAPIN1	0.711336	Down	2.23794e-05
P46777	RPL5	0.711487	Down	0.000227146
Q9Y696	CLIC4	0.711578	Down	0.0001402
Q70IA6	MOB2	0.711616	Down	9.52209e-05
Q01970	PLCB3	0.71163	Down	3.67338e-06
Q99952	PTPN18	0.711882	Down	0.00812891
P00568	AK1	0.712165	Down	2.63741e-06
Q9Y285	FARSA	0.712436	Down	1.87795e-05
P62249	RPS16	0.712585	Down	0.000114125
O15066	KIF3B	0.712598	Down	0.0144745
P12814	ACTN1	0.712634	Down	5.41261e-05
Q13613	MTMR1	0.712835	Down	0.00120295
P06753	TPM3	0.713008	Down	0.000461308
Q9H361	PABPC3	0.713278	Down	0.0160239
P63220	RPS21	0.713303	Down	1.47544e-07
P51808	DYNLT3	0.713365	Down	0.00319345
P62861	FAU	0.713403	Down	0.00316687
Q8WVK7	SKA2	0.713445	Down	2.10529e-05
P61960	UFM1	0.713535	Down	0.000125149
Q9Y2Z0	SUGT1	0.713624	Down	1.49837e-05
A5D8V6	VPS37C	0.713756	Down	0.0397509
P11172	UMPS	0.713806	Down	4.24306e-05
P54136	RARS1	0.714063	Down	2.99582e-05
P07437	TUBB	0.714091	Down	0.000431845
Q14258	TRIM25	0.714436	Down	1.06128e-05
P55010	EIF5	0.714925	Down	7.0588e-05
P55263	ADK	0.714926	Down	7.60172e-05
Q96DG6	CMBL	0.714983	Down	6.58884e-05
Q05209	PTPN12	0.715062	Down	1.74511e-05
B5ME19	EIF3CL	0.715169	Down	9.68823e-05
O15084	ANKRD28	0.715485	Down	7.28959e-05
Q96EI5	TCEAL4	0.715528	Down	0.000412206
Q13418	ILK	0.71572	Down	1.58948e-05
Q9NUG6	PDRG1	0.715766	Down	9.72288e-05
O60232	ZNRD2	0.716219	Down	0.000598747
P30154	PPP2R1B	0.716307	Down	0.00224483
Q6P3X3	TTC27	0.716358	Down	1.62159e-06
Q13347	EIF3I	0.716547	Down	6.46232e-05
P13489	RNH1	0.716572	Down	0.000412725
Q92619	ARHGAP45	0.716641	Down	0.000968113
Q8IUW3	SPATA2L	0.716862	Down	6.27135e-05
Q15404	RSU1	0.716898	Down	3.74046e-05
Q9UJU6	DBNL	0.717256	Down	0.000133132
P30520	ADSS2	0.717287	Down	4.69881e-05
P27348	YWHAQ	0.717399	Down	0.000272425
O00764	PDXK	0.717765	Down	6.59951e-07
Q12979	ABR	0.717924	Down	1.81612e-05
P62256	UBE2H	0.718014	Down	0.000122399
Q14152	EIF3A	0.718024	Down	1.24632e-05
Q96SB4	SRPK1	0.718137	Down	0.000661451
Q9BTY7	HGH1	0.71817	Down	8.17036e-06
Q8IX07	ZFPM1	0.718482	Down	0.000378774
Q9UQ80	PA2G4	0.718493	Down	1.12382e-05
Q14185	DOCK1	0.718502	Down	0.000501562
Q92609	TBC1D5	0.718628	Down	2.43609e-05
O95352	ATG7	0.718764	Down	5.18989e-05
P02765	AHSG	0.718807	Down	0.0376888
Q9Y5K6	CD2AP	0.718839	Down	6.44332e-05
Q9H2H9	SLC38A1	0.71891	Down	5.43829e-05
Q9BXJ9	NAA15	0.719035	Down	2.41132e-05
O43776	NARS1	0.719414	Down	4.76361e-05
P27707	DCK	0.719485	Down	0.00167459
P52732	KIF11	0.719611	Down	1.22368e-05
Q9BRA0	NAA38	0.719793	Down	0.000313756
Q08752	PPID	0.720059	Down	2.35719e-05
Q9HCN4	GPN1	0.720475	Down	6.82557e-05
Q9BY44	EIF2A	0.72051	Down	0.000232399
Q9NQS1	AVEN	0.72063	Down	8.35377e-05
Q96AT1	KIAA1143	0.720636	Down	0.000476589
O43592	XPOT	0.720961	Down	0.0001055
P49427	CDC34	0.721181	Down	8.25005e-05
Q8NC51	SERBP1	0.721214	Down	5.43104e-06
O00244	ATOX1	0.721493	Down	0.000226863
Q9H467	CUEDC2	0.72206	Down	0.000168374
Q96SZ5	ADO	0.722121	Down	0.000673303
Q96BY6	DOCK10	0.72217	Down	8.32516e-06
Q8TAE6	PPP1R14C	0.722215	Down	0.00163021
P61086	UBE2K	0.722223	Down	0.000285395
Q5JTW2	CEP78	0.722285	Down	0.000978283
Q9HB71	CACYBP	0.722682	Down	4.65233e-05
P61923	COPZ1	0.722751	Down	8.70116e-06
P23381	WARS1	0.722906	Down	0.000145476
Q9BRS2	RIOK1	0.723127	Down	2.62669e-06
O15530	PDPK1	0.72326	Down	0.00100513
Q8N5S9	CAMKK1	0.723386	Down	0.00501297
O95336	PGLS	0.723426	Down	0.000138507
Q96P48	ARAP1	0.723504	Down	1.52668e-05
Q16342	PDCD2	0.723673	Down	0.00683077
Q96GQ5	RUSF1	0.72387	Down	1.79024e-05
Q96GX9	APIP	0.724049	Down	0.000968064
Q13177	PAK2	0.724091	Down	0.000177756
Q9H3H3	C11orf68	0.724106	Down	5.63465e-05
O15371	EIF3D	0.724322	Down	0.000109443
Q9UJK0	TSR3	0.72433	Down	0.000194241
Q712K3	UBE2R2	0.724409	Down	2.55005e-05
O75663	TIPRL	0.724496	Down	7.59235e-05
O15372	EIF3H	0.724612	Down	7.77082e-05
P00491	PNP	0.724744	Down	0.000185378
Q86XU0	ZNF677	0.724811	Down	0.00242905
P67936	TPM4	0.72495	Down	0.00205108
P04350	TUBB4A	0.724983	Down	0.000219357
Q99426	TBCB	0.725086	Down	0.000296434
P61956	SUMO2	0.725433	Down	0.00237886
P62328	TMSB4X	0.72556	Down	0.00144199
Q53EZ4	CEP55	0.725672	Down	9.59493e-06
Q9H2K8	TAOK3	0.725694	Down	0.00548812
Q9H8K7	PAAT	0.725707	Down	0.000812739
P35268	RPL22	0.725795	Down	0.000861044
O75436	VPS26A	0.725909	Down	0.000471019
Q15121	PEA15	0.726102	Down	0.000682802
Q9Y4G6	TLN2	0.726117	Down	8.54278e-05
P46060	RANGAP1	0.726212	Down	0.000141542
Q5T6F2	UBAP2	0.726222	Down	8.47908e-05
O95819	MAP4K4	0.726254	Down	2.93207e-05
Q9UJ68	MSRA	0.726793	Down	0.000178174
A6NDU8	RIMOC1	0.726929	Down	0.000786194
Q9Y484	WDR45	0.726938	Down	1.40874e-05
Q9BVW5	TIPIN	0.727042	Down	0.000852201
Q96EK6	GNPNAT1	0.72728	Down	0.000332709
O75116	ROCK2	0.727334	Down	2.89059e-05
Q02543	RPL18A	0.727497	Down	0.000178079
Q6AI12	ANKRD40	0.727563	Down	0.00218509
P05387	RPLP2	0.727564	Down	0.000226657
Q9NVE7	PANK4	0.7277	Down	0.000146993
Q9Y613	FHOD1	0.727712	Down	4.86437e-05
P49356	FNTB	0.728486	Down	0.032328
P15311	EZR	0.728491	Down	9.52241e-05
O60443	GSDME	0.728564	Down	0.000250955
P46781	RPS9	0.728606	Down	0.000172415
Q9Y490	TLN1	0.728771	Down	1.41022e-05
Q9BU89	DOHH	0.728922	Down	0.000149005
P17812	CTPS1	0.728932	Down	8.41702e-05
Q15126	PMVK	0.72904	Down	3.33819e-05
O76003	GLRX3	0.729096	Down	3.47469e-05
Q9UBB4	ATXN10	0.729131	Down	7.0104e-05
Q9ULX3	NOB1	0.729419	Down	2.5656e-05
Q0VDF9	HSPA14	0.729532	Down	9.2786e-05
Q96QG7	MTMR9	0.729613	Down	0.000207052
Q99733	NAP1L4	0.729642	Down	7.43333e-05
Q9UHV9	PFDN2	0.730038	Down	8.02188e-05
Q9BRT3	MIEN1	0.730046	Down	0.00010244
Q13155	AIMP2	0.730085	Down	0.000622425
Q02878	RPL6	0.730104	Down	1.31192e-05
Q9NWV4	CZIB	0.730244	Down	1.46719e-05
Q9NZA1	CLIC5	0.730529	Down	0.00104346
P63098	PPP3R1	0.730542	Down	0.000561405
O95373	IPO7	0.730666	Down	2.58721e-05
Q9UKZ1	CNOT11	0.730743	Down	0.000287539
Q00796	SORD	0.730765	Down	1.15025e-05
P47895	ALDH1A3	0.730799	Down	2.39532e-05
P62837	UBE2D2	0.730944	Down	1.63388e-05
Q00341	HDLBP	0.731037	Down	4.82248e-05
Q14157	UBAP2L	0.731054	Down	9.38724e-06
Q04637	EIF4G1	0.731262	Down	4.50874e-05
Q9NUQ3	TXLNG	0.731441	Down	0.000738735
Q8TF05	PPP4R1	0.731473	Down	5.06777e-05
Q99614	TTC1	0.731542	Down	7.39223e-05
Q9UMY4	SNX12	0.73163	Down	0.000145706
Q8NEC7	GSTCD	0.731652	Down	0.000259294
Q9BQC3	DPH2	0.732051	Down	4.18076e-05
Q9NS87	KIF15	0.732143	Down	4.91959e-05
Q7L273	KCTD9	0.732158	Down	0.000924286
P09497	CLTB	0.732168	Down	6.55017e-05
P62424	RPL7A	0.732358	Down	0.00044372
O60716	CTNND1	0.732398	Down	4.9904e-05
Q7L7V1	DHX32	0.732402	Down	0.000360875
O75312	ZPR1	0.732613	Down	1.93913e-05
P06703	S100A6	0.732623	Down	0.000493994
P62266	RPS23	0.732645	Down	9.17981e-06
Q6YHU6	THADA	0.732676	Down	1.32594e-05
P22234	PAICS	0.732708	Down	8.75785e-05
Q9P2J5	LARS1	0.732808	Down	0.000101244
Q86WR0	CCDC25	0.73282	Down	0.000172345
Q9NR33	POLE4	0.73284	Down	0.00139908
Q9UEW8	STK39	0.732877	Down	0.00269649
Q53GA4	PHLDA2	0.732899	Down	0.0138142
O95456	PSMG1	0.732953	Down	4.51736e-06
Q7Z2Z2	EFL1	0.73297	Down	4.51392e-05
Q969Q0	RPL36AL	0.732986	Down	0.000622348
Q9BX40	LSM14B	0.733348	Down	6.55995e-06
P07814	EPRS1	0.733401	Down	0.000131966
Q07866	KLC1	0.733697	Down	7.65597e-06
Q13362	PPP2R5C	0.733738	Down	6.14225e-05
Q13501	SQSTM1	0.733904	Down	4.33759e-05
Q13685	AAMP	0.734121	Down	1.71322e-06
P49023	PXN	0.734284	Down	0.000153794
Q9Y244	POMP	0.734399	Down	1.29823e-05
Q16560	SNRNP35	0.734447	Down	0.00168813
Q6PGP7	SKIC3	0.734572	Down	8.31081e-06
Q9ULC4	MCTS1	0.734608	Down	0.000479689
Q12792	TWF1	0.73488	Down	8.09652e-06
Q15181	PPA1	0.734978	Down	0.000162341
P24666	ACP1	0.735087	Down	0.00011075
O14737	PDCD5	0.735165	Down	0.00146368
Q6AI08	HEATR6	0.735474	Down	5.46191e-06
Q8N6H7	ARFGAP2	0.735593	Down	6.41515e-05
Q9BVS4	RIOK2	0.735746	Down	0.000181349
P33981	TTK	0.735787	Down	5.56413e-05
P49589	CARS1	0.735814	Down	1.94441e-05
O15111	CHUK	0.735906	Down	0.000911256
O94763	URI1	0.736108	Down	1.997e-05
P62280	RPS11	0.736149	Down	0.000784428
Q9UNH7	SNX6	0.736306	Down	0.000220058
Q9UHY8	FEZ2	0.73635	Down	0.0021799
Q05397	PTK2	0.736472	Down	0.000163788
Q15012	LAPTM4A	0.736479	Down	0.000582657
Q5W0V3	FHIP2A	0.736683	Down	0.00150487
Q68CZ2	TNS3	0.736746	Down	1.07393e-06
Q68DQ2	CRYBG3	0.736797	Down	4.07778e-05
Q8WUH2	TGFBRAP1	0.736828	Down	0.000658948
Q9UNN5	FAF1	0.736842	Down	8.58465e-05
P08708	RPS17	0.73685	Down	0.0001572
P52735	VAV2	0.737119	Down	3.00902e-05
Q9NRZ5	AGPAT4	0.737528	Down	0.000452001
O95793	STAU1	0.737596	Down	9.20106e-05
Q8WU90	ZC3H15	0.737881	Down	9.94751e-05
Q9NZN5	ARHGEF12	0.737895	Down	0.00012421
Q6PKG0	LARP1	0.738283	Down	1.13936e-05
O60294	LCMT2	0.738514	Down	0.00267764
O75843	AP1G2	0.738722	Down	0.000156841
O95551	TDP2	0.738722	Down	0.00189007
A3KN83	SBNO1	0.738831	Down	7.3995e-05
P62854	RPS26	0.738876	Down	0.000385902
P35790	CHKA	0.73898	Down	0.000581661
Q8N7X0	ADGB	0.73899	Down	3.07134e-05
P15924	DSP	0.739238	Down	0.00762051
Q9P2X3	IMPACT	0.739275	Down	0.00692354
P62829	RPL23	0.739296	Down	9.31035e-05
Q8WZA0	LZIC	0.739383	Down	0.000575958
Q9UBB6	NCDN	0.739478	Down	5.24323e-05
Q8N0Z6	TTC5	0.739559	Down	0.0002953
Q9UPZ3	HPS5	0.739596	Down	6.78303e-05
O43414	ERI3	0.739651	Down	0.00121289
P45983	MAPK8	0.739689	Down	3.20087e-06
P04439	HLA-A	0.739813	Down	9.92436e-05
Q6PJG6	BRAT1	0.739883	Down	0.00119362
Q8TEQ6	GEMIN5	0.739983	Down	2.7378e-05
P23526	AHCY	0.740061	Down	3.35202e-05
O43175	PHGDH	0.740075	Down	0.000202192
Q7Z478	DHX29	0.740174	Down	2.1606e-05
P49207	RPL34	0.740213	Down	0.000137936
P10599	TXN	0.740244	Down	0.000806481
P02649	APOE	0.74027	Down	5.0597e-05
P41252	IARS1	0.74041	Down	4.03853e-05
Q08117	TLE5	0.740547	Down	6.27751e-05
P57075	UBASH3A	0.740674	Down	0.000760114
O15305	PMM2	0.74074	Down	0.000482306
Q3KQU3	MAP7D1	0.74079	Down	2.89281e-05
P62244	RPS15A	0.7408	Down	0.00306534
O15013	ARHGEF10	0.740845	Down	4.72739e-05
P46976	GYG1	0.740888	Down	0.00154264
Q9H299	SH3BGRL3	0.740896	Down	0.000631547
Q9HD40	SEPSECS	0.741268	Down	0.000645411
P11586	MTHFD1	0.741568	Down	9.13179e-05
O43768	ENSA	0.74159	Down	0.000238235
Q16543	CDC37	0.741898	Down	0.000195122
Q07960	ARHGAP1	0.742049	Down	0.000485417
Q8TEC5	SH3RF2	0.742097	Down	0.00110658
O75821	EIF3G	0.742142	Down	5.90644e-05
Q9HB09	BCL2L12	0.742238	Down	3.45211e-05
Q96CD2	PPCDC	0.742294	Down	0.00143231
Q99543	DNAJC2	0.742348	Down	4.22364e-05
Q8TEA8	DTD1	0.742409	Down	2.7013e-05
P32969	RPL9P9	0.742488	Down	0.000127542
P54252	ATXN3	0.742574	Down	0.000484752
P30050	RPL12	0.742576	Down	2.96027e-05
P32119	PRDX2	0.742852	Down	0.00226705
Q02750	MAP2K1	0.742867	Down	1.97719e-05
P61457	PCBD1	0.742927	Down	0.00428215
P47224	RABIF	0.74301	Down	0.0123848
O15116	LSM1	0.743219	Down	0.000656736
Q9NSP4	CENPM	0.743424	Down	0.000354985
Q53FT3	HIKESHI	0.74353	Down	0.000391646
Q9NYL2	MAP3K20	0.743721	Down	0.000188535
Q9H993	ARMT1	0.743824	Down	0.00148888
Q96B97	SH3KBP1	0.743898	Down	6.42877e-05
P15374	UCHL3	0.743934	Down	0.000171488
P31946	YWHAB	0.743974	Down	0.000719255
Q96MX6	DNAAF10	0.744161	Down	0.000456119
Q9BY42	RTF2	0.744328	Down	0.000125637
O43491	EPB41L2	0.74436	Down	4.41364e-05
Q9UBS8	RNF14	0.744618	Down	2.7495e-05
Q9NSD9	FARSB	0.744634	Down	0.000102903
P31939	ATIC	0.744797	Down	5.65128e-05
P62750	RPL23A	0.744892	Down	0.000458151
Q8N806	UBR7	0.745062	Down	0.000251453
Q9BWT6	MND1	0.745078	Down	0.000129956
P31749	AKT1	0.745131	Down	0.000179344
O14980	XPO1	0.745178	Down	0.000235719
Q7L8W6	DPH6	0.745188	Down	0.000133932
Q8TDZ2	MICAL1	0.74535	Down	0.000706483
Q03113	GNA12	0.745503	Down	0.00521954
P08397	HMBS	0.745579	Down	4.79034e-05
P11908	PRPS2	0.745682	Down	0.00113887
Q9UJ41	RABGEF1	0.745729	Down	0.000144747
Q6P1Q9	METTL2B	0.745863	Down	0.00736597
P50991	CCT4	0.745986	Down	0.000131337
P41250	GARS1	0.746046	Down	6.55716e-05
O75391	SPAG7	0.746201	Down	4.98146e-06
Q00688	FKBP3	0.74621	Down	1.8574e-06
Q9GZT8	NIF3L1	0.746212	Down	0.0001718
C9J7I0	UMAD1	0.746231	Down	0.00049111
O43707	ACTN4	0.746322	Down	0.000397293
Q9UBK8	MTRR	0.746401	Down	6.685e-05
P62269	RPS18	0.746427	Down	0.000169088
P62917	RPL8	0.746539	Down	5.04431e-05
P51397	DAP	0.7466	Down	0.000361524
Q92845	KIFAP3	0.746679	Down	3.82445e-05
A7XYQ1	SOBP	0.746691	Down	0.0170433
Q6NW29	RWDD4	0.746743	Down	1.64238e-05
Q8TD26	CHD6	0.746881	Down	0.000934493
Q15435	PPP1R7	0.746959	Down	1.18448e-05
P47897	QARS1	0.746983	Down	6.95421e-06
Q9NQY0	BIN3	0.747072	Down	4.49325e-05
Q9HC98	NEK6	0.747181	Down	0.0051395
Q96A49	SYAP1	0.747333	Down	4.97214e-07
Q5T2E6	ARMH3	0.747599	Down	0.000617769
Q9Y3P9	RABGAP1	0.747713	Down	4.95098e-06
Q9H6T3	RPAP3	0.747793	Down	6.24677e-05
O75884	RBBP9	0.747813	Down	0.0005487
Q9GZT9	EGLN1	0.747869	Down	0.000354609
P28676	GCA	0.747877	Down	0.000426598
Q15437	SEC23B	0.748026	Down	8.57701e-05
Q9H0A8	COMMD4	0.748266	Down	0.000869029
P62937	PPIA	0.748313	Down	0.000103814
Q86T82	USP37	0.748332	Down	0.00334942
P61088	UBE2N	0.748441	Down	0.000672217
Q92783	STAM	0.748496	Down	9.97822e-06
Q15691	MAPRE1	0.748536	Down	5.94307e-05
Q719H9	KCTD1	0.748579	Down	0.00455468
Q13526	PIN1	0.748788	Down	0.000136164
O43805	SSNA1	0.748813	Down	0.000173323
Q15021	NCAPD2	0.748845	Down	0.000239303
Q9H4M9	EHD1	0.749039	Down	6.15766e-05
Q9NVD7	PARVA	0.749086	Down	1.71062e-05
Q92973	TNPO1	0.749167	Down	1.03776e-05
Q6PD74	AAGAB	0.749204	Down	0.000102923
O75083	WDR1	0.74928	Down	7.43492e-05
Q8NB46	ANKRD52	0.749519	Down	0.00140749
O60749	SNX2	0.74976	Down	0.00012415
Q9H1J1	UPF3A	0.749803	Down	0.00635603
Q8IWC1	MAP7D3	0.749883	Down	0.0153589
O75351	VPS4B	0.749903	Down	5.45948e-05
Q9UG63	ABCF2	0.75004	Down	4.37991e-06
Q9Y3S2	ZNF330	0.750129	Down	1.78172e-05
Q8N122	RPTOR	0.750162	Down	2.04499e-05
Q9NVS9	PNPO	0.750221	Down	0.00248789
Q9NYP9	MIS18A	0.750354	Down	0.000388993
Q9NX46	ADPRS	0.750571	Down	1.2067e-05
O15078	CEP290	0.750701	Down	8.44735e-05
P37173	TGFBR2	0.750739	Down	6.2225e-05
P18124	RPL7	0.75081	Down	0.000193249
Q92859	NEO1	0.750826	Down	0.00208647
Q92830	KAT2A	0.750867	Down	0.00321463
P00492	HPRT1	0.750895	Down	0.000327492
Q8NBF6	AVL9	0.751162	Down	7.85055e-05
Q9Y6E2	BZW2	0.751253	Down	0.000154691
Q4V328	GRIPAP1	0.751345	Down	2.22171e-05
Q9BZD4	NUF2	0.751402	Down	0.000698407
Q96K76	USP47	0.751477	Down	4.94934e-06
Q9NVG8	TBC1D13	0.751539	Down	0.000125583
Q9UGI8	TES	0.751626	Down	0.000278855
P07195	LDHB	0.751669	Down	0.000165271
Q96G03	PGM2	0.751826	Down	6.73769e-05
O60927	PPP1R11	0.751907	Down	0.00413305
P47974	ZFP36L2	0.752046	Down	0.00590651
O14817	TSPAN4	0.7521	Down	0.00111847
Q8IYD1	GSPT2	0.752152	Down	0.00245133
Q15185	PTGES3	0.752516	Down	0.00277188
P07203	GPX1	0.752582	Down	0.0167097
Q8NFA0	USP32	0.752735	Down	0.000701586
Q15046	KARS1	0.752776	Down	8.11495e-05
P62899	RPL31	0.752829	Down	0.00515181
P98170	XIAP	0.752869	Down	0.000727225
P26373	RPL13	0.752869	Down	0.000811562
Q9BQL6	FERMT1	0.752916	Down	0.0001303
Q04206	RELA	0.752931	Down	0.000300788
Q9H2J4	PDCL3	0.752949	Down	0.000179964
P35221	CTNNA1	0.752978	Down	0.000468991
Q4J6C6	PREPL	0.752982	Down	0.000570256
Q9BPX5	ARPC5L	0.752997	Down	1.39732e-06
Q9Y250	LZTS1	0.753048	Down	0.000375465
Q92990	GLMN	0.753063	Down	0.000550441
P52888	THOP1	0.753083	Down	5.27403e-05
Q147X3	NAA30	0.753189	Down	2.12264e-05
Q13310	PABPC4	0.753246	Down	3.1899e-06
Q8WYQ5	DGCR8	0.753255	Down	0.000740901
O94903	PLPBP	0.753305	Down	0.00150233
Q9Y6E0	STK24	0.753572	Down	2.61705e-05
Q15814	TBCC	0.7536	Down	0.000119478
O75815	BCAR3	0.753648	Down	7.60372e-05
P17655	CAPN2	0.753654	Down	0.000295143
Q9Y3E7	CHMP3	0.753721	Down	3.58236e-05
Q9NTJ3	SMC4	0.753873	Down	2.35088e-05
P49643	PRIM2	0.753922	Down	8.50272e-05
O95997	PTTG1	0.753984	Down	0.000660439
Q9UGP4	LIMD1	0.753998	Down	8.12105e-06
Q13485	SMAD4	0.754047	Down	2.47705e-05
O60524	NEMF	0.754164	Down	6.93557e-05
P62701	RPS4X	0.754255	Down	0.000706631
Q6Q0C0	TRAF7	0.75427	Down	0.0393186
Q9Y5X3	SNX5	0.754291	Down	0.000643727
P05198	EIF2S1	0.754305	Down	7.37305e-05
Q16537	PPP2R5E	0.754309	Down	9.23963e-05
O43427	FIBP	0.754312	Down	0.000337088
Q71RC2	LARP4	0.754321	Down	6.62351e-05
P11940	PABPC1	0.754451	Down	3.78967e-05
Q9BRF8	CPPED1	0.75456	Down	0.000948165
P61254	RPL26	0.754781	Down	0.00172411
O14733	MAP2K7	0.754887	Down	0.00275269
Q06124	PTPN11	0.754894	Down	0.000349083
P18206	VCL	0.754987	Down	0.000134761
Q13572	ITPK1	0.755072	Down	1.74549e-05
P25098	GRK2	0.755084	Down	7.22819e-05
Q96JJ3	ELMO2	0.755219	Down	2.0825e-05
Q12765	SCRN1	0.755311	Down	0.000130061
Q8IWB7	WDFY1	0.755346	Down	1.56164e-05
Q9H1P3	OSBPL2	0.75557	Down	0.000345015
Q92636	NSMAF	0.755592	Down	0.00038995
Q9UBK9	UXT	0.755758	Down	8.26149e-05
Q15819	UBE2V2	0.755812	Down	0.000679692
P61513	RPL37A	0.755853	Down	3.40968e-05
Q8N1Q1	CA13	0.7559	Down	0.000943103
Q9P2R3	ANKFY1	0.755929	Down	0.000176937
Q9Y376	CAB39	0.755989	Down	2.11232e-05
Q8N3P4	VPS8	0.756029	Down	0.00163158
Q7Z4G1	COMMD6	0.756183	Down	7.79292e-06
Q05639	EEF1A2	0.756244	Down	0.000471937
Q13442	PDAP1	0.756364	Down	3.84156e-05
P53618	COPB1	0.756469	Down	0.000163226
Q9Y5P4	CERT1	0.756564	Down	0.000417467
P61160	ACTR2	0.756611	Down	6.42139e-05
Q9Y448	KNSTRN	0.756637	Down	2.80372e-05
P49770	EIF2B2	0.756648	Down	1.06736e-05
Q8IY22	CMIP	0.756653	Down	0.000796109
Q7L5Y1	ENOSF1	0.756924	Down	6.17254e-05
Q9GZV4	EIF5A2	0.757132	Down	0.000153727
Q2M389	WASHC4	0.757163	Down	0.000395191
Q9Y3B8	REXO2	0.757228	Down	0.000347491
Q6GMV2	SMYD5	0.757268	Down	0.000361814
Q9HD15	SRA1	0.757295	Down	2.92938e-06
P46778	RPL21	0.75731	Down	0.000282081
Q14674	ESPL1	0.757366	Down	0.00305908
Q92995	USP13	0.757396	Down	4.70351e-05
P62906	RPL10A	0.757484	Down	1.08662e-05
B3KU38	IQCJ-SCHIP1	0.757548	Down	7.03791e-05
Q9Y4E8	USP15	0.757655	Down	1.95463e-05
Q68CZ6	HAUS3	0.75766	Down	0.000273362
Q9NPQ8	RIC8A	0.757834	Down	0.000255084
Q5PRF9	SAMD4B	0.758025	Down	7.06484e-05
Q96PZ2	FAM111A	0.75803	Down	0.000136378
O95361	TRIM16	0.758068	Down	5.22538e-05
P61204	ARF3	0.758074	Down	6.4607e-05
P55854	SUMO3	0.758326	Down	7.58535e-05
P40818	USP8	0.758398	Down	7.00371e-05
Q9H8M2	BRD9	0.758622	Down	0.0178029
O00308	WWP2	0.758657	Down	0.000642877
P05408	SCG5	0.758712	Down	0.00301973
P62277	RPS13	0.758717	Down	0.000350128
Q9UI26	IPO11	0.75874	Down	6.21015e-05
Q96T51	RUFY1	0.758806	Down	7.10487e-05
Q53HC9	EIPR1	0.758862	Down	0.00144445
Q66K14	TBC1D9B	0.75888	Down	4.20527e-06
P62753	RPS6	0.758885	Down	0.00434549
Q8WU79	SMAP2	0.758915	Down	4.11001e-05
Q96E14	RMI2	0.758924	Down	0.017104
Q14155	ARHGEF7	0.759259	Down	1.06481e-05
P62913	RPL11	0.759346	Down	0.000679545
Q04917	YWHAH	0.759359	Down	0.000185433
Q07020	RPL18	0.759383	Down	0.0013684
Q15056	EIF4H	0.759471	Down	8.02707e-05
O00233	PSMD9	0.759636	Down	0.00033694
Q92696	RABGGTA	0.759676	Down	1.29577e-05
Q9H074	PAIP1	0.759692	Down	8.74364e-05
Q3KRA9	ALKBH6	0.759754	Down	0.0205384
O15144	ARPC2	0.759843	Down	0.000285318
P04733	MT1F	0.759866	Down	0.010764
O75506	HSBP1	0.759871	Down	5.86699e-06
Q6NZ67	MZT2B	0.759985	Down	0.000344163
O00303	EIF3F	0.760017	Down	9.05116e-06
Q8NCE2	MTMR14	0.760036	Down	0.000287079
P30086	PEBP1	0.760435	Down	0.000191631
Q99447	PCYT2	0.760525	Down	8.64129e-05
Q8IYB7	DIS3L2	0.760693	Down	0.000243352
Q9UI10	EIF2B4	0.76073	Down	4.19425e-05
Q9H0C8	ILKAP	0.760883	Down	0.000267075
P61081	UBE2M	0.760908	Down	0.000149115
Q8TD16	BICD2	0.760915	Down	3.206e-06
P55039	DRG2	0.760922	Down	3.69219e-05
P28482	MAPK1	0.761057	Down	0.0001125
Q8WUP2	FBLIM1	0.761064	Down	7.80937e-05
P61313	RPL15	0.761087	Down	0.000220428
P49368	CCT3	0.761108	Down	0.000469319
Q8N8S7	ENAH	0.761171	Down	0.000166077
P78371	CCT2	0.761291	Down	0.000179967
O94822	LTN1	0.761303	Down	0.000965645
Q9NZI7	UBP1	0.761317	Down	0.00131047
O43502	RAD51C	0.761339	Down	4.47752e-05
Q9NRD5	PICK1	0.761479	Down	0.0109974
P67809	YBX1	0.761571	Down	0.000229399
P23919	DTYMK	0.761682	Down	5.84442e-05
P0DPB5	POLR1D	0.761771	Down	0.0200523
P55884	EIF3B	0.761902	Down	0.000100541
Q14558	PRPSAP1	0.762169	Down	2.09936e-05
P04083	ANXA1	0.762449	Down	1.90064e-05
O15523	DDX3Y	0.762476	Down	0.000276852
Q96BN8	OTULIN	0.762479	Down	4.99261e-05
Q9BRG1	VPS25	0.762557	Down	1.32934e-05
Q9BVG4	PBDC1	0.762643	Down	0.000134762
Q9H8W4	PLEKHF2	0.762807	Down	0.00151275
Q9UMZ2	SYNRG	0.76301	Down	5.42245e-05
Q9UPT9	USP22	0.763276	Down	1.74181e-05
Q9NZD2	GLTP	0.763317	Down	0.000642521
O14545	TRAFD1	0.763396	Down	0.0156261
O00203	AP3B1	0.763509	Down	4.57441e-05
P21980	TGM2	0.763556	Down	2.44322e-05
P46783	RPS10	0.763583	Down	7.92445e-05
Q5T4S7	UBR4	0.763662	Down	6.89886e-05
Q16566	CAMK4	0.763751	Down	0.000385843
P20073	ANXA7	0.76386	Down	5.41859e-05
P11766	ADH5	0.763902	Down	0.000233545
P49902	NT5C2	0.764022	Down	0.00080632
P23396	RPS3	0.764158	Down	1.37329e-05
P18085	ARF4	0.764204	Down	0.00025099
Q9ULT8	HECTD1	0.764492	Down	3.44303e-05
Q9UNF0	PACSIN2	0.764589	Down	0.000419268
B3EWG6	FAM25G	0.764625	Down	0.00196941
P13798	APEH	0.764739	Down	0.000214521
Q14204	DYNC1H1	0.764851	Down	0.000100902
Q9NP73	ALG13	0.76489	Down	0.00100467
Q96EB1	ELP4	0.76492	Down	0.0181635
P15531	NME1	0.764987	Down	0.000106247
Q8TDJ6	DMXL2	0.765066	Down	0.00139677
P56192	MARS1	0.765135	Down	5.90695e-05
Q15276	RABEP1	0.765211	Down	1.39541e-05
P48739	PITPNB	0.765245	Down	4.40326e-06
Q86Y56	DNAAF5	0.765328	Down	0.000305053
P15559	NQO1	0.765363	Down	0.0001636
Q9UNI6	DUSP12	0.7654	Down	2.37781e-05
Q9P260	RELCH	0.765434	Down	0.000383434
Q8IY47	KBTBD2	0.765526	Down	0.000215088
P35606	COPB2	0.765531	Down	1.93419e-05
Q0PNE2	ELP6	0.765599	Down	7.19442e-06
Q13596	SNX1	0.765675	Down	0.000397565
Q9UHB4	NDOR1	0.765728	Down	0.038607
Q9UHR6	ZNHIT2	0.765737	Down	0.00024265
Q92888	ARHGEF1	0.765774	Down	5.04618e-05
Q8NBT2	SPC24	0.765903	Down	2.46676e-06
P18621	RPL17	0.765913	Down	5.78857e-06
P16333	NCK1	0.765921	Down	0.000146003
P60891	PRPS1	0.76605	Down	3.47312e-05
P17987	TCP1	0.766197	Down	0.000330932
P49840	GSK3A	0.766273	Down	0.000649681
P61158	ACTR3	0.766314	Down	2.95299e-05
Q9P2D3	HEATR5B	0.766363	Down	0.000877127
O00214	LGALS8	0.76646	Down	0.000235771
Q8TDX7	NEK7	0.766535	Down	0.000552852
Q9NVZ3	NECAP2	0.766577	Down	0.000379479
P49675	STAR	0.766632	Down	0.000320142
Q9Y295	DRG1	0.766728	Down	0.000127913
P62263	RPS14	0.766793	Down	2.85203e-06
Q9UPT5	EXOC7	0.76696	Down	4.31476e-06
Q9Y2T2	AP3M1	0.76704	Down	8.40868e-06
Q9BZG8	DPH1	0.767146	Down	0.000113747
Q8NFP7	NUDT10	0.767277	Down	0.000638701
O75676	RPS6KA4	0.767325	Down	2.28064e-05
O15143	ARPC1B	0.767412	Down	0.000393129
O43318	MAP3K7	0.767772	Down	0.00482973
Q9Y3U8	RPL36	0.767777	Down	0.00138493
Q13404	UBE2V1	0.767786	Down	0.000106505
O76039	CDKL5	0.76779	Down	0.00173598
Q14166	TTLL12	0.768024	Down	8.59108e-05
P62253	UBE2G1	0.768212	Down	0.000832824
Q9UJ70	NAGK	0.768216	Down	5.38939e-05
Q01433	AMPD2	0.768244	Down	1.85687e-05
P10586	PTPRF	0.768415	Down	0.00251074
Q96RF0	SNX18	0.768633	Down	0.00623417
P52788	SMS	0.768731	Down	7.62056e-05
Q92616	GCN1	0.76886	Down	5.84437e-05
Q9BR76	CORO1B	0.76886	Down	0.000120386
Q12904	AIMP1	0.769029	Down	1.21259e-05
Q9NVF9	ETNK2	0.769073	Down	0.00751466
O14964	HGS	0.769121	Down	0.000142435
Q12974	PTP4A2	0.769155	Down	7.66569e-06
Q9NUQ8	ABCF3	0.769283	Down	0.000144328
Q01518	CAP1	0.769353	Down	8.49586e-05
P26640	VARS1	0.769603	Down	4.24193e-05
Q00653	NFKB2	0.770043	Down	1.60013e-05
P48643	CCT5	0.77005	Down	0.00050626
P07741	APRT	0.770078	Down	0.000313699
Q3KQV9	UAP1L1	0.77011	Down	4.26355e-05
O43399	TPD52L2	0.770242	Down	0.00013435
Q00534	CDK6	0.770455	Down	0.000483788
Q9NPH3	IL1RAP	0.770457	Down	0.0299114
Q8WZA9	IRGQ	0.770505	Down	3.66172e-05
P46109	CRKL	0.770544	Down	9.36694e-05
P39023	RPL3	0.770544	Down	0.000113589
Q676U5	ATG16L1	0.770587	Down	0.00320191
Q9Y5L0	TNPO3	0.770667	Down	0.00209426
P0DP25	CALM3	0.770692	Down	0.0005838
P19419	ELK1	0.770708	Down	0.000922751
Q6FIF0	ZFAND6	0.770797	Down	0.00147718
Q9BTE3	MCMBP	0.770799	Down	8.90942e-05
Q9NUQ6	SPATS2L	0.770854	Down	6.64148e-05
O94760	DDAH1	0.770863	Down	0.000130235
Q13885	TUBB2A	0.77094	Down	0.000139152
Q8NA72	POC5	0.771059	Down	0.014818
Q92805	GOLGA1	0.771166	Down	0.00143272
Q9UID3	VPS51	0.771177	Down	0.00120909
Q8IYF1	ELOA2	0.771398	Down	0.00289569
P59998	ARPC4	0.771446	Down	0.000104939
P40227	CCT6A	0.771473	Down	0.000168753
Q86V21	AACS	0.771531	Down	6.85407e-06
Q68EM7	ARHGAP17	0.771633	Down	6.20796e-05
Q9H3C7	GGNBP2	0.771744	Down	0.000580826
Q9BTW9	TBCD	0.771911	Down	6.11697e-06
Q9BRP4	PAAF1	0.771986	Down	0.00172362
P48059	LIMS1	0.771993	Down	0.000803835
P29144	TPP2	0.772339	Down	0.00011688
P31947	SFN	0.77238	Down	0.000639662
Q13045	FLII	0.772493	Down	1.73578e-05
Q96T88	UHRF1	0.772518	Down	0.00039702
Q9HB96	FANCE	0.772639	Down	0.0182357
P42766	RPL35	0.772648	Down	0.0039889
P62847	RPS24	0.772796	Down	0.00186647
Q6UWE0	LRSAM1	0.773055	Down	0.00122709
P53350	PLK1	0.773125	Down	0.00018779
Q9UPQ0	LIMCH1	0.773255	Down	5.1309e-05
Q96BJ3	AIDA	0.773266	Down	1.35345e-05
Q9H2G2	SLK	0.773273	Down	7.07695e-05
Q9BXB5	OSBPL10	0.773348	Down	0.000810867
Q9NXN4	GDAP2	0.773413	Down	0.0092736
Q9UK41	VPS28	0.7735	Down	0.000837365
Q96D71	REPS1	0.773505	Down	0.000319947
Q15003	NCAPH	0.773525	Down	0.000364736
Q9Y5T5	USP16	0.77355	Down	0.000244029
Q16881	TXNRD1	0.773618	Down	0.000313377
P57772	EEFSEC	0.773677	Down	0.000351302
Q14CS0	UBXN2B	0.773709	Down	0.00295944
Q8TEA7	TBCK	0.773965	Down	0.0125691
P19838	NFKB1	0.773968	Down	0.000308945
Q8IUI8	CRLF3	0.774006	Down	1.72869e-05
P78552	IL13RA1	0.774078	Down	0.000245356
P62714	PPP2CB	0.774128	Down	0.000591381
Q9H9C1	VIPAS39	0.774172	Down	0.000387739
Q9NY33	DPP3	0.774256	Down	0.000101672
Q8WV99	ZFAND2B	0.774396	Down	7.28643e-05
Q9NQP4	PFDN4	0.774407	Down	0.000276294
O43324	EEF1E1	0.774455	Down	1.95096e-06
P11274	BCR	0.774457	Down	0.00048771
O95817	BAG3	0.774487	Down	3.55899e-05
Q8NEB9	PIK3C3	0.774611	Down	3.75808e-05
Q9Y248	GINS2	0.774715	Down	0.0213261
Q7L266	ASRGL1	0.774759	Down	0.000368971
P51617	IRAK1	0.775017	Down	0.00396033
Q5TFE4	NT5DC1	0.775031	Down	0.000530507
P41743	PRKCI	0.775121	Down	0.000294906
O95835	LATS1	0.775243	Down	0.00256492
Q8WUM4	PDCD6IP	0.775381	Down	7.60541e-05
Q9Y6D6	ARFGEF1	0.77542	Down	8.04077e-06
Q03154	ACY1	0.775508	Down	0.000237054
Q9H0F6	SHARPIN	0.775513	Down	0.000684768
P30153	PPP2R1A	0.775547	Down	0.000285595
Q9BR61	ACBD6	0.775565	Down	0.00212857
Q6ULP2	AFTPH	0.7759	Down	0.015521
Q9UHD2	TBK1	0.775934	Down	0.00011595
P09496	CLTA	0.77602	Down	0.00348014
Q93052	LPP	0.776159	Down	4.87089e-05
P31949	S100A11	0.776223	Down	0.00381337
P50748	KNTC1	0.776284	Down	0.000555558
P50053	KHK	0.776288	Down	0.0429216
Q9NS86	LANCL2	0.776295	Down	4.89852e-05
Q9GZQ3	COMMD5	0.776331	Down	3.4156e-05
Q96EY4	TMA16	0.776395	Down	2.91917e-05
Q99497	PARK7	0.776438	Down	9.75538e-05
O15145	ARPC3	0.776442	Down	0.000435298
Q14232	EIF2B1	0.776555	Down	0.000492716
Q96EX3	DYNC2I2	0.776616	Down	0.0125164
Q969S3	ZNF622	0.776713	Down	7.68467e-05
Q14671	PUM1	0.776765	Down	0.000860205
Q8NE71	ABCF1	0.776803	Down	7.93044e-05
Q96JY6	PDLIM2	0.776828	Down	1.19568e-06
Q99832	CCT7	0.776925	Down	6.62552e-05
Q86VI3	IQGAP3	0.776968	Down	1.81423e-05
Q86W34	AMZ2	0.777257	Down	0.00838516
P63173	RPL38	0.777418	Down	0.00135298
Q9NSC5	HOMER3	0.777483	Down	4.03921e-05
P78344	EIF4G2	0.777523	Down	0.000126709
Q9Y5A9	YTHDF2	0.777559	Down	0.000929887
Q9H0R1	AP5M1	0.77763	Down	0.03536
Q9UPU5	USP24	0.777753	Down	4.40739e-06
Q14C86	GAPVD1	0.777778	Down	7.72817e-05
Q6PL24	TMED8	0.77778	Down	0.0032477
P40222	TXLNA	0.777985	Down	1.81079e-05
Q9H6S3	EPS8L2	0.778029	Down	0.000160454
Q9P2E3	ZNFX1	0.778125	Down	0.000106798
Q8N565	MREG	0.778335	Down	0.0490628
Q5VWZ2	LYPLAL1	0.778421	Down	0.000419037
Q99836	MYD88	0.778445	Down	0.00107284
Q8NCA5	FAM98A	0.778535	Down	0.00120316
Q9UHJ6	SHPK	0.778616	Down	9.13231e-05
Q9NUL3	STAU2	0.778767	Down	0.00463314
Q9P253	VPS18	0.778769	Down	0.00047947
Q96MW1	CCDC43	0.778841	Down	0.000183653
Q53H82	LACTB2	0.778974	Down	0.00264104
Q14240	EIF4A2	0.779087	Down	0.00154941
P54725	RAD23A	0.77939	Down	6.66384e-05
Q92598	HSPH1	0.779465	Down	0.00087564
Q06203	PPAT	0.77948	Down	0.000106465
Q49AR2	C5orf22	0.779541	Down	0.00102669
Q9H2U1	DHX36	0.779557	Down	0.000224649
Q9UL63	MKLN1	0.779559	Down	4.7517e-06
Q9UH65	SWAP70	0.779582	Down	0.000134654
P50914	RPL14	0.779604	Down	1.57262e-05
Q99471	PFDN5	0.779719	Down	0.000453658
Q9Y4E1	WASHC2C	0.779744	Down	0.00347213
Q6DHV7	ADAL	0.779781	Down	6.64272e-05
O60841	EIF5B	0.7798	Down	3.18825e-05
Q8NB37	GATD1	0.780063	Down	0.000194654
Q9Y678	COPG1	0.780069	Down	0.000193648
P27448	MARK3	0.780184	Down	0.000140372
O95067	CCNB2	0.780197	Down	0.0215669
P68371	TUBB4B	0.780215	Down	1.46967e-06
Q8WVT3	TRAPPC12	0.780253	Down	8.48271e-05
O14777	NDC80	0.780355	Down	0.00313441
Q15366	PCBP2	0.780482	Down	0.000196438
P22090	RPS4Y1	0.780534	Down	3.08738e-05
Q8TDQ7	GNPDA2	0.780586	Down	0.00133716
Q32MZ4	LRRFIP1	0.780873	Down	0.000200268
O60256	PRPSAP2	0.780902	Down	5.348e-05
Q8TE04	PANK1	0.780942	Down	0.000500846
Q8WUR7	C15orf40	0.781111	Down	0.000221026
O95163	ELP1	0.781277	Down	5.97345e-06
P50552	VASP	0.781393	Down	0.000217721
Q00526	CDK3	0.781425	Down	0.000927884
Q86WJ1	CHD1L	0.781481	Down	0.000175515
O43583	DENR	0.781534	Down	0.000453895
Q15527	SURF2	0.781606	Down	0.000152604
O95486	SEC24A	0.781629	Down	0.000149953
Q96C19	EFHD2	0.781702	Down	4.80157e-05
Q15555	MAPRE2	0.781759	Down	0.00393797
P26038	MSN	0.78177	Down	4.68842e-05
Q9H4A6	GOLPH3	0.781792	Down	0.000143639
O95613	PCNT	0.781817	Down	0.0108374
Q92871	PMM1	0.781955	Down	0.00567016
Q96AZ6	ISG20	0.782049	Down	0.000330664
Q5SYE7	NHSL1	0.782103	Down	1.16255e-06
Q9UBQ0	VPS29	0.782105	Down	2.08907e-05
Q9NRX4	PHPT1	0.78218	Down	0.00100277
O75828	CBR3	0.782291	Down	0.000238247
P39019	RPS19	0.782314	Down	0.00220121
Q6IA86	ELP2	0.782343	Down	3.38385e-05
P24941	CDK2	0.782435	Down	0.000689233
Q13509	TUBB3	0.782569	Down	0.000210735
Q9NX02	NLRP2	0.782571	Down	0.000209311
P40763	STAT3	0.782576	Down	0.000181608
Q9BYJ9	YTHDF1	0.782578	Down	0.00494841
Q86YR5	GPSM1	0.782585	Down	0.0139084
O00743	PPP6C	0.782629	Down	0.00011755
Q8N4C8	MINK1	0.782737	Down	0.0110184
Q14691	GINS1	0.782839	Down	7.83822e-05
P63279	UBE2I	0.782889	Down	0.00117906
Q9Y4R8	TELO2	0.782916	Down	0.000648532
O95466	FMNL1	0.782989	Down	2.74559e-05
Q9Y450	HBS1L	0.783099	Down	2.43769e-05
P46937	YAP1	0.783114	Down	0.000311461
P43034	PAFAH1B1	0.783209	Down	0.000151396
Q08AD1	CAMSAP2	0.78328	Down	1.60408e-06
P16083	NQO2	0.783313	Down	0.000972372
Q7Z6K3	PTAR1	0.783434	Down	0.000224973
Q96BW5	PTER	0.783651	Down	0.000120888
Q9NZW5	PALS2	0.783666	Down	0.000160326
Q9NPF0	CD320	0.783704	Down	4.00947e-05
Q9P2H5	USP35	0.783791	Down	0.0165426
P50990	CCT8	0.783814	Down	0.000242247
Q96IV0	NGLY1	0.78387	Down	2.35151e-05
P49914	MTHFS	0.784017	Down	3.99341e-05
Q9UPM8	AP4E1	0.784071	Down	8.90123e-05
O00178	GTPBP1	0.784329	Down	0.00141352
Q15599	SLC9A3R2	0.784374	Down	0.000611404
Q9Y5X1	SNX9	0.784377	Down	6.4059e-05
Q8N3C0	ASCC3	0.784434	Down	3.03243e-05
Q14694	USP10	0.784579	Down	2.23057e-05
O00506	STK25	0.784657	Down	6.28476e-05
Q9NXC5	MIOS	0.784885	Down	0.000581568
Q9Y3C0	WASHC3	0.784923	Down	0.000144527
A2RUS2	DENND3	0.785052	Down	0.0168427
Q9UL42	PNMA2	0.785164	Down	9.76167e-06
Q9Y5P6	GMPPB	0.785204	Down	3.28833e-05
P78417	GSTO1	0.785371	Down	0.000650424
O75330	HMMR	0.785429	Down	6.36572e-05
P26196	DDX6	0.785516	Down	0.00020017
Q8NG68	TTL	0.785564	Down	0.000680954
Q9UHB9	SRP68	0.785607	Down	1.71925e-05
Q8IVU3	HERC6	0.78589	Down	0.0131464
P15923	TCF3	0.786057	Down	3.17291e-05
P41091	EIF2S3	0.786186	Down	7.87109e-05
Q05682	CALD1	0.786283	Down	0.00112858
O95985	TOP3B	0.78651	Down	6.78636e-06
Q9Y6G9	DYNC1LI1	0.786563	Down	0.000125374
P48444	ARCN1	0.786706	Down	0.00019433
P10644	PRKAR1A	0.786759	Down	0.00109698
Q13546	RIPK1	0.786766	Down	0.00117909
Q9H5N1	RABEP2	0.786912	Down	2.80749e-05
A1A4S6	ARHGAP10	0.786986	Down	0.00176852
P54105	CLNS1A	0.787095	Down	0.000521588
Q9BZE2	PUS3	0.78727	Down	0.00745931
Q9H9A6	LRRC40	0.787286	Down	8.26718e-05
O95347	SMC2	0.78741	Down	8.62498e-05
P46821	MAP1B	0.78789	Down	0.000259687
Q12802	AKAP13	0.787994	Down	2.17067e-05
P42677	RPS27	0.788051	Down	0.000552795
Q9NRV9	HEBP1	0.788065	Down	4.19483e-05
Q96CS2	HAUS1	0.788076	Down	0.000340998
Q03013	GSTM4	0.788138	Down	0.00944621
O75886	STAM2	0.788222	Down	1.81129e-05
Q02224	CENPE	0.788242	Down	0.00142905
Q8TBZ3	WDR20	0.788533	Down	0.0188531
Q9NZ52	GGA3	0.78857	Down	0.000729126
A0AVT1	UBA6	0.788617	Down	0.000916795
Q9Y5A7	NUB1	0.788681	Down	0.000229169
O94964	SOGA1	0.788801	Down	0.000913056
P24386	CHM	0.788814	Down	9.89597e-05
Q9NRZ9	HELLS	0.788827	Down	4.19794e-07
Q9C0F1	CEP44	0.788878	Down	0.000283423
Q5H8C1	FREM1	0.788885	Down	0.00628529
Q6XZF7	DNMBP	0.789023	Down	0.000130764
Q9ULV4	CORO1C	0.789036	Down	0.00260372
Q9Y6W3	CAPN7	0.789187	Down	5.91642e-05
P53621	COPA	0.789259	Down	0.000108784
Q9NWX6	THG1L	0.78928	Down	0.000991624
Q9NP77	SSU72	0.789282	Down	0.000253271
Q8TBF5	PIGX	0.789374	Down	0.0133814
P10768	ESD	0.78945	Down	0.000314388
P12268	IMPDH2	0.789496	Down	0.000550723
O14617	AP3D1	0.789676	Down	0.000273132
Q9BVA0	KATNB1	0.789793	Down	7.48708e-05
Q9UQ13	SHOC2	0.789842	Down	0.000220183
Q96FW1	OTUB1	0.789862	Down	0.000237235
Q6P1L5	FAM117B	0.789879	Down	0.012768
Q9Y5B8	NME7	0.789952	Down	0.0138998
O94817	ATG12	0.79003	Down	0.00180324
P41229	KDM5C	0.790054	Down	0.0403714
Q04323	UBXN1	0.790091	Down	0.000344637
Q13356	PPIL2	0.790107	Down	0.000577296
Q8WU76	SCFD2	0.790427	Down	0.000795084
Q8TC07	TBC1D15	0.790527	Down	4.97967e-05
Q9GZZ9	UBA5	0.7906	Down	8.95466e-05
Q15257	PTPA	0.790691	Down	0.000445217
Q86XA9	HEATR5A	0.790721	Down	0.00299713
Q9BUH6	PAXX	0.790779	Down	0.00054645
P63104	YWHAZ	0.790781	Down	0.00104317
P35030	PRSS3	0.790845	Down	0.00336253
Q6IPR3	TYW3	0.790953	Down	0.012463
P07900	HSP90AA1	0.790955	Down	0.00127884
Q9C0I1	MTMR12	0.791013	Down	0.00490656
Q9Y5V3	MAGED1	0.791048	Down	2.07055e-05
Q9Y530	OARD1	0.791364	Down	0.00761286
Q16539	MAPK14	0.791446	Down	8.86358e-06
Q9H832	UBE2Z	0.791567	Down	0.000449069
P30419	NMT1	0.791644	Down	0.000132469
P84098	RPL19	0.791693	Down	0.00102457
Q7Z3E5	ARMC9	0.791746	Down	0.00667266
Q9UN86	G3BP2	0.791918	Down	0.000972207
O75175	CNOT3	0.792072	Down	1.88839e-05
Q9UEE5	STK17A	0.792101	Down	0.00126177
Q9NWS0	PIH1D1	0.792114	Down	9.66546e-05
O14867	BACH1	0.792163	Down	0.00278764
Q9H9T3	ELP3	0.792224	Down	0.000185021
Q9UQB8	BAIAP2	0.79246	Down	2.0119e-06
Q6GMV3	PTRHD1	0.792497	Down	0.000494769
Q13287	NMI	0.792634	Down	2.02203e-05
Q13409	DYNC1I2	0.792753	Down	0.00125877
Q9UHI6	DDX20	0.792821	Down	0.00195725
P13716	ALAD	0.7929	Down	0.000703678
Q15057	ACAP2	0.792916	Down	2.80442e-07
O94967	WDR47	0.793052	Down	0.0156649
Q8IUR0	TRAPPC5	0.793206	Down	0.000416911
Q16513	PKN2	0.793257	Down	0.000238737
Q9Y371	SH3GLB1	0.793277	Down	0.00108961
Q9BPX3	NCAPG	0.793431	Down	2.04186e-05
Q9Y6W5	WASF2	0.793442	Down	0.000682743
O14562	UBFD1	0.793746	Down	0.00127704
Q6ZRQ5	MMS22L	0.793913	Down	0.00187691
O15037	KHNYN	0.794056	Down	0.000201841
Q6ZT12	UBR3	0.794196	Down	0.01078
Q5H9R7	PPP6R3	0.794218	Down	0.000169698
Q9Y4P8	WIPI2	0.79466	Down	0.000509145
Q9BQ67	GRWD1	0.794886	Down	1.0907e-05
Q8N9N2	ASCC1	0.79504	Down	0.000794118
Q9H0B6	KLC2	0.795048	Down	0.000552558
Q93008	USP9X	0.795108	Down	0.000472342
Q9HD26	GOPC	0.795535	Down	0.000190489
Q6P2H3	CEP85	0.795562	Down	0.00970589
P17931	LGALS3	0.795628	Down	0.00161468
P04049	RAF1	0.795649	Down	3.49039e-05
Q53RE8	ANKRD39	0.795919	Down	0.016375
P36578	RPL4	0.796068	Down	0.000427249
Q9UNS1	TIMELESS	0.796114	Down	2.57037e-05
Q8WUW1	BRK1	0.79627	Down	0.000374256
P50995	ANXA11	0.796386	Down	9.34251e-05
Q70E73	RAPH1	0.796487	Down	0.000740155
Q8IWR0	ZC3H7A	0.796537	Down	2.131e-05
P31948	STIP1	0.796723	Down	0.000285149
P46940	IQGAP1	0.796736	Down	0.000163598
Q96MV1	TLCD4	0.796815	Down	0.0344731
Q9NSY1	BMP2K	0.796968	Down	0.0328616
Q9NWZ5	UCKL1	0.796979	Down	9.55833e-05
P52789	HK2	0.797036	Down	0.000153792
Q9NXF7	DCAF16	0.797351	Down	0.0286616
Q7Z3T8	ZFYVE16	0.797351	Down	6.56721e-06
Q5JPI3	C3orf38	0.797421	Down	0.013332
O14965	AURKA	0.797517	Down	0.000541441
P61981	YWHAG	0.797618	Down	0.00841083
A6NJ78	METTL15	0.797649	Down	0.00774746
O00560	SDCBP	0.797681	Down	0.000182927
P53367	ARFIP1	0.797773	Down	7.82159e-05
Q16719	KYNU	0.797789	Down	0.000374479
P49441	INPP1	0.797832	Down	0.00100003
P20936	RASA1	0.798044	Down	0.000118773
Q14106	TOB2	0.798271	Down	0.00114029
Q01804	OTUD4	0.798297	Down	0.000601409
P00352	ALDH1A1	0.798407	Down	0.000281877
P62888	RPL30	0.798418	Down	0.00241347
P40261	NNMT	0.798433	Down	0.000505948
P04632	CAPNS1	0.798538	Down	0.000155287
Q8IZP0	ABI1	0.798582	Down	2.31975e-05
P52594	AGFG1	0.79868	Down	0.000155064
P63172	DYNLT1	0.798918	Down	0.00547846
O96028	NSD2	0.798948	Down	0.0044258
P11216	PYGB	0.798983	Down	0.000122586
Q13283	G3BP1	0.799048	Down	5.2313e-05
O95149	SNUPN	0.799049	Down	6.28372e-07
Q9Y3D0	CIAO2B	0.799096	Down	0.000956419
O43747	AP1G1	0.799129	Down	5.68892e-05
P47914	RPL29	0.79928	Down	0.000842241
Q6P1N9	TATDN1	0.799297	Down	0.00012342
P23258	TUBG1	0.799378	Down	0.000386916
Q14677	CLINT1	0.799443	Down	0.000189172
Q8TE02	ELP5	0.799535	Down	0.0016528
Q14008	CKAP5	0.799681	Down	7.56868e-05
P31153	MAT2A	0.799759	Down	0.000510531
Q96DM3	RMC1	0.799781	Down	8.67017e-05
Q9BY43	CHMP4A	0.799849	Down	0.000209313
P50238	CRIP1	0.799875	Down	0.00127644
O14787	TNPO2	0.800215	Down	0.00417216
Q9H098	FAM107B	0.800224	Down	1.25712e-05
Q14738	PPP2R5D	0.800382	Down	4.17387e-05
Q5GLZ8	HERC4	0.800437	Down	0.000184052
Q8N0T1	RBIS	0.800465	Down	0.0014979
P0CAP2	POLR2M	0.80047	Down	0.00111787
O00442	RTCA	0.800537	Down	0.00035258
Q9NRW3	APOBEC3C	0.800665	Down	0.0164642
O00499	BIN1	0.800687	Down	0.00708807
Q9NRF9	POLE3	0.800785	Down	7.29313e-07
Q8TB72	PUM2	0.800818	Down	0.00262406
P78330	PSPH	0.800924	Down	0.000111842
P35237	SERPINB6	0.800937	Down	0.0010172
P30043	BLVRB	0.801013	Down	0.000195695
Q99598	TSNAX	0.801055	Down	2.88427e-05
Q96D31	ORAI1	0.801155	Down	0.000136101
Q9NRY5	FAM114A2	0.80129	Down	0.00212628
Q96QF0	RAB3IP	0.801364	Down	0.00310014
Q7Z569	BRAP	0.801407	Down	0.00100863
O43482	OIP5	0.801431	Down	0.017291
Q03169	TNFAIP2	0.801585	Down	0.000469838
O60925	PFDN1	0.801586	Down	0.000466507
Q96DH6	MSI2	0.801653	Down	1.96062e-05
O75569	PRKRA	0.801894	Down	0.00154327
Q15042	RAB3GAP1	0.80192	Down	0.000489919
O60566	BUB1B	0.801981	Down	0.000211916
O15397	IPO8	0.802033	Down	0.000232925
Q9NRG1	PRTFDC1	0.802103	Down	0.000283363
O14920	IKBKB	0.802127	Down	0.00319782
Q9UIA9	XPO7	0.802181	Down	0.000474515
Q9NQ88	TIGAR	0.802248	Down	0.00074459
Q96IU4	ABHD14B	0.802272	Down	0.00065902
Q8NE01	CNNM3	0.8023	Down	0.0135372
P49795	RGS19	0.802372	Down	0.0337784
Q7Z4H7	HAUS6	0.802526	Down	0.000196162
Q9UN37	VPS4A	0.802585	Down	0.00116903
Q96GY0	ZC2HC1A	0.802661	Down	0.000353927
Q15477	SKIC2	0.802724	Down	0.000507065
P42694	HELZ	0.802728	Down	0.000118998
P35612	ADD2	0.802843	Down	9.92348e-05
Q9UNT1	RABL2B	0.802869	Down	0.0336797
Q68DK2	ZFYVE26	0.802923	Down	0.00133318
O43716	GATC	0.802954	Down	0.000254748
O95372	LYPLA2	0.803047	Down	0.00352537
P26374	CHML	0.803283	Down	0.001304
O95628	CNOT4	0.803366	Down	0.00195812
Q96FS4	SIPA1	0.803394	Down	0.00520806
Q9UET6	FTSJ1	0.803507	Down	0.0025958
P33764	S100A3	0.803515	Down	0.0013474
P12955	PEPD	0.803554	Down	0.00015592
P49915	GMPS	0.803565	Down	0.000529969
Q8IWD4	CCDC117	0.803624	Down	0.00714532
Q99707	MTR	0.803626	Down	1.00477e-06
O60888	CUTA	0.803888	Down	0.00388928
P50851	LRBA	0.80389	Down	6.26542e-06
Q15154	PCM1	0.803938	Down	0.000411625
Q9NUP7	TRMT13	0.804083	Down	0.000394398
P78324	SIRPA	0.804091	Down	3.00405e-05
Q6ZSZ5	ARHGEF18	0.804176	Down	9.10097e-05
O15498	YKT6	0.804403	Down	5.25549e-05
P36507	MAP2K2	0.804416	Down	2.84645e-05
Q7LBR1	CHMP1B	0.804568	Down	0.000439134
Q14974	KPNB1	0.804596	Down	0.000155099
Q9NQR4	NIT2	0.804747	Down	9.2742e-05
O43633	CHMP2A	0.804769	Down	0.002429
P80217	IFI35	0.804972	Down	0.000168425
Q96CT7	CCDC124	0.805074	Down	5.3336e-05
Q9UGV2	NDRG3	0.805135	Down	0.000118753
Q7Z3U7	MON2	0.805139	Down	0.000447682
Q96BX8	MOB3A	0.805176	Down	0.00208276
Q9Y2A7	NCKAP1	0.805401	Down	0.00010129
P08238	HSP90AB1	0.805429	Down	0.000807477
Q15418	RPS6KA1	0.805442	Down	0.000449212
Q5T0F9	CC2D1B	0.805575	Down	2.11029e-05
Q5T5P2	KIAA1217	0.80566	Down	3.33458e-05
P30530	AXL	0.805733	Down	5.09301e-05
Q13625	TP53BP2	0.806111	Down	0.0084561
Q8N392	ARHGAP18	0.806113	Down	0.00132094
O43314	PPIP5K2	0.806183	Down	0.00032632
Q07864	POLE	0.806672	Down	0.000187732
Q15654	TRIP6	0.806722	Down	5.185e-06
O43617	TRAPPC3	0.806884	Down	0.000300696
Q9Y605	MRFAP1	0.806901	Down	0.00440829
Q9Y587	AP4S1	0.806921	Down	0.0132562
Q8TCD5	NT5C	0.807007	Down	0.000168835
Q9UPR3	SMG5	0.807343	Down	0.00333047
Q14CX7	NAA25	0.80736	Down	8.44776e-05
P49366	DHPS	0.807419	Down	0.00163506
Q9P2T1	GMPR2	0.807488	Down	8.83513e-05
Q71UM5	RPS27L	0.807669	Down	0.0205019
O00273	DFFA	0.807722	Down	0.00155388
O15067	PFAS	0.807727	Down	0.000465165
Q9Y6D5	ARFGEF2	0.807834	Down	6.12176e-05
O43301	HSPA12A	0.808132	Down	0.00708675
Q7Z6V5	ADAT2	0.808186	Down	0.0282737
Q86SZ2	TRAPPC6B	0.808205	Down	4.2215e-06
Q92974	ARHGEF2	0.808317	Down	2.12015e-06
Q9BRX2	PELO	0.808379	Down	0.00321103
P27708	CAD	0.808422	Down	4.0008e-05
Q66LE6	PPP2R2D	0.808571	Down	0.00039845
O14618	CCS	0.808581	Down	6.67719e-05
P62841	RPS15	0.808603	Down	0.000763718
Q9HBI1	PARVB	0.808603	Down	0.00212439
P42566	EPS15	0.808721	Down	0.000462047
Q9BT67	NDFIP1	0.808861	Down	2.01001e-05
O14757	CHEK1	0.808937	Down	0.00592899
Q9UKF7	PITPNC1	0.809352	Down	6.80709e-05
P41440	SLC19A1	0.809453	Down	0.0180233
P19174	PLCG1	0.809603	Down	0.00134003
Q9BV86	NTMT1	0.809648	Down	0.00291505
Q2VPK5	CTU2	0.809657	Down	0.00346109
Q6XQN6	NAPRT	0.809685	Down	2.48795e-05
O14730	RIOK3	0.809698	Down	0.000400779
P41214	EIF2D	0.809743	Down	2.16653e-05
O95394	PGM3	0.809751	Down	0.00139102
Q9HAU4	SMURF2	0.80976	Down	3.989e-06
O43639	NCK2	0.809768	Down	0.035313
O75688	PPM1B	0.809798	Down	0.000174354
Q9NR46	SH3GLB2	0.810037	Down	0.000102592
Q8IWZ3	ANKHD1	0.810153	Down	0.000118577
Q86UX6	STK32C	0.810155	Down	0.00774577
Q5VW32	BROX	0.81026	Down	5.93727e-05
O00429	DNM1L	0.810297	Down	0.000391769
Q15750	TAB1	0.810333	Down	0.000178116
Q92546	RGP1	0.810398	Down	0.00807852
Q9BSI4	TINF2	0.810558	Down	0.000519763
Q9UJY5	GGA1	0.810859	Down	0.00211145
Q96G28	CFAP36	0.810904	Down	0.000339944
Q9H4A4	RNPEP	0.810987	Down	0.000271041
Q8N1G4	LRRC47	0.811249	Down	1.68715e-05
Q13464	ROCK1	0.811358	Down	0.00170187
P48200	IREB2	0.811448	Down	0.00131287
Q8TBX8	PIP4K2C	0.811466	Down	0.000108214
Q9Y520	PRRC2C	0.811472	Down	9.32746e-05
P16152	CBR1	0.811487	Down	0.000282227
P55327	TPD52	0.811605	Down	1.63172e-05
A8K0Z3	WASHC1	0.811646	Down	1.38391e-05
Q9UBP0	SPAST	0.811716	Down	0.000693395
O43570	CA12	0.811826	Down	0.0070424
P04406	GAPDH	0.811887	Down	0.00018535
P08758	ANXA5	0.81195	Down	0.000252615
Q14376	GALE	0.812179	Down	0.000238847
O95630	STAMBP	0.812305	Down	0.000464104
Q9H9E3	COG4	0.812598	Down	6.43584e-06
O14976	GAK	0.812675	Down	0.00125394
Q96TA1	NIBAN2	0.81281	Down	0.000368086
Q8WVJ2	NUDCD2	0.812861	Down	0.000332587
Q9UNW9	NOVA2	0.812917	Down	0.00706142
Q8NEU8	APPL2	0.81299	Down	0.000939128
P54619	PRKAG1	0.81305	Down	0.000201771
Q6P158	DHX57	0.813135	Down	0.000160634
P40925	MDH1	0.813146	Down	0.00121435
Q9NWX5	ASB6	0.813154	Down	0.004672
Q9Y263	PLAA	0.813302	Down	0.000135345
Q8TEW0	PARD3	0.813436	Down	0.000450371
O95359	TACC2	0.813466	Down	0.00132776
Q04864	REL	0.813518	Down	0.0042766
Q9P0V9	SEPTIN10	0.81355	Down	0.000762718
P49674	CSNK1E	0.813609	Down	0.00977066
Q06210	GFPT1	0.813697	Down	0.000118854
P35241	RDX	0.813734	Down	2.92246e-05
Q92900	UPF1	0.813797	Down	2.69968e-05
Q9Y2X7	GIT1	0.813817	Down	0.00507703
Q9GZT4	SRR	0.813849	Down	0.00863497
Q8WW01	TSEN15	0.813872	Down	0.0071575
P32456	GBP2	0.813943	Down	0.000200219
P55283	CDH4	0.813983	Down	0.000246132
Q3LXA3	TKFC	0.814003	Down	8.60285e-05
O14772	FPGT	0.814041	Down	0.00105141
Q13561	DCTN2	0.814097	Down	0.000728651
Q9UNY4	TTF2	0.814135	Down	0.00816356
Q14195	DPYSL3	0.814167	Down	0.000653931
P63165	SUMO1	0.814176	Down	0.00714692
P36405	ARL3	0.814312	Down	0.00316427
Q9UBF2	COPG2	0.814349	Down	1.53442e-05
Q9NYL9	TMOD3	0.814359	Down	0.000390829
Q15075	EEA1	0.814415	Down	0.000134365
Q8TBE9	NANP	0.814432	Down	0.00330942
Q9Y4X5	ARIH1	0.814508	Down	0.000139151
Q9Y496	KIF3A	0.814555	Down	0.00253086
P49662	CASP4	0.814728	Down	0.00872361
Q8NHV4	NEDD1	0.814737	Down	0.000687031
Q8WVY7	UBLCP1	0.814888	Down	0.000139412
P23193	TCEA1	0.814897	Down	0.00120887
Q7Z739	YTHDF3	0.815065	Down	0.000321484
Q8ND04	SMG8	0.815069	Down	6.64158e-05
Q5SW79	CEP170	0.815086	Down	4.63026e-05
Q9H910	JPT2	0.815153	Down	0.000206449
P35240	NF2	0.815157	Down	0.00019933
O60502	OGA	0.815176	Down	0.000193291
Q9BQ61	TRIR	0.815193	Down	0.000673518
Q96AX1	VPS33A	0.815199	Down	8.83038e-05
A9UHW6	MIF4GD	0.815278	Down	0.000200277
Q8N5I9	NOPCHAP1	0.815296	Down	0.000544874
P14868	DARS1	0.815342	Down	0.000335165
Q02790	FKBP4	0.815511	Down	0.000112694
Q9UHP3	USP25	0.815605	Down	0.000403353
P68402	PAFAH1B2	0.815626	Down	0.000799617
Q9NNW5	WDR6	0.815702	Down	0.00248463
P32455	GBP1	0.815886	Down	5.44296e-05
Q53T59	HS1BP3	0.816141	Down	0.000748453
Q8IX04	UEVLD	0.816158	Down	0.00347058
O00151	PDLIM1	0.816188	Down	0.000430297
Q8WUM9	SLC20A1	0.816305	Down	7.42095e-05
Q9UQN3	CHMP2B	0.816369	Down	0.000311696
Q8IV50	LYSMD2	0.816369	Down	0.000693269
P14618	PKM	0.816444	Down	0.000555707
Q9H3U1	UNC45A	0.816448	Down	2.09591e-05
Q13643	FHL3	0.816475	Down	0.0178251
P55212	CASP6	0.816533	Down	0.00156148
Q4KMP7	TBC1D10B	0.816614	Down	1.19244e-06
Q9Y3I1	FBXO7	0.816629	Down	0.00185153
Q9Y608	LRRFIP2	0.816709	Down	0.000321241
Q6IBS0	TWF2	0.816824	Down	0.00082673
P29218	IMPA1	0.816899	Down	0.000205005
Q15283	RASA2	0.816912	Down	1.59715e-05
Q15438	CYTH1	0.817033	Down	1.53844e-06
Q07157	TJP1	0.817063	Down	6.65006e-06
Q13144	EIF2B5	0.817094	Down	2.78459e-05
Q9H223	EHD4	0.817173	Down	0.00110697
Q96FX2	DPH3	0.817188	Down	0.00475464
Q9NSV4	DIAPH3	0.817199	Down	0.00147344
Q92615	LARP4B	0.817233	Down	0.00190125
O95861	BPNT1	0.81746	Down	0.00281215
Q9UGR2	ZC3H7B	0.817496	Down	0.000331448
Q15678	PTPN14	0.8176	Down	0.00284704
Q12899	TRIM26	0.817602	Down	0.000108097
P50443	SLC26A2	0.817715	Down	0.0009551
P46782	RPS5	0.817732	Down	4.55769e-05
Q9Y294	ASF1A	0.818138	Down	0.000417368
Q9HAW4	CLSPN	0.818225	Down	0.0027525
P00519	ABL1	0.818244	Down	0.00782809
P09132	SRP19	0.818341	Down	0.00182511
P29353	SHC1	0.818505	Down	8.6008e-05
Q9Y243	AKT3	0.818728	Down	5.07294e-05
Q06830	PRDX1	0.818789	Down	0.00148292
Q9C0C9	UBE2O	0.818917	Down	0.000142528
Q2NL82	TSR1	0.818957	Down	9.71075e-05
P37802	TAGLN2	0.819156	Down	0.00653609
Q17RN3	FAM98C	0.819222	Down	0.000613086
Q15813	TBCE	0.819334	Down	0.000352812
P46108	CRK	0.819694	Down	6.17053e-06
P51114	FXR1	0.819766	Down	0.000312453
Q6DKJ4	NXN	0.819811	Down	7.96988e-05
Q13332	PTPRS	0.819917	Down	0.0418611
O75608	LYPLA1	0.819978	Down	0.00261269
Q9NSI2	SLX9	0.820014	Down	0.000684599
O95786	RIGI	0.82004	Down	0.000247715
O76094	SRP72	0.820105	Down	0.000804291
Q01973	ROR1	0.82019	Down	0.0113348
Q7L576	CYFIP1	0.82022	Down	0.000330115
O14744	PRMT5	0.820234	Down	0.000533894
Q7Z6B0	CCDC91	0.820268	Down	0.0135238
Q92844	TANK	0.820421	Down	0.00850642
Q15334	LLGL1	0.820573	Down	0.000477846
Q9H0E2	TOLLIP	0.820607	Down	0.00052177
Q9H977	WDR54	0.820719	Down	0.000640093
Q96N67	DOCK7	0.820753	Down	0.000110381
Q13772	NCOA4	0.8211	Down	0.00588501
Q5HYK7	SH3D19	0.821225	Down	0.000222489
P45985	MAP2K4	0.821531	Down	0.00113281
Q92551	IP6K1	0.821611	Down	0.000619478
O95721	SNAP29	0.821688	Down	0.00472173
Q9Y5S2	CDC42BPB	0.821844	Down	0.00081875
Q15365	PCBP1	0.821964	Down	0.000264511
Q9Y5Z4	HEBP2	0.822009	Down	2.2716e-05
Q9H0W8	SMG9	0.822063	Down	0.0021403
Q7L3B6	CDC37L1	0.822171	Down	0.00120642
P08237	PFKM	0.822188	Down	1.22279e-05
Q9H2M9	RAB3GAP2	0.822515	Down	4.00287e-05
Q7Z5L2	R3HCC1L	0.82252	Down	0.0042882
Q00610	CLTC	0.822598	Down	0.000155768
Q86XZ4	SPATS2	0.822781	Down	0.000853046
P40616	ARL1	0.822893	Down	0.00377536
Q96FZ2	HMCES	0.822912	Down	5.81041e-06
O95295	SNAPIN	0.822979	Down	7.6251e-05
Q8IYT2	CMTR2	0.823055	Down	0.00352916
Q6NXR4	TTI2	0.823068	Down	0.00289011
Q5JTZ9	AARS2	0.823093	Down	0.000350906
P00918	CA2	0.823172	Down	0.00053013
Q86VX9	MON1A	0.823479	Down	0.0230153
Q8NG08	HELB	0.823484	Down	0.0155994
Q9Y4K3	TRAF6	0.823492	Down	0.0216274
Q9C0E2	XPO4	0.823553	Down	1.2075e-05
Q5JSH3	WDR44	0.823616	Down	0.00123656
Q96CX2	KCTD12	0.823795	Down	0.000193361
Q86UK7	ZNF598	0.824206	Down	2.74389e-05
P31689	DNAJA1	0.824433	Down	0.000229142
Q9Y6I3	EPN1	0.824493	Down	0.00292176
Q9GZN1	ACTR6	0.824697	Down	0.000588599
P60660	MYL6	0.824943	Down	0.00435806
Q9Y4C1	KDM3A	0.82496	Down	0.00568099
Q8NFG4	FLCN	0.824997	Down	0.00277933
P00441	SOD1	0.825008	Down	0.00257459
O94808	GFPT2	0.825058	Down	3.30725e-05
Q9UK39	NOCT	0.825084	Down	0.00777038
Q96HA8	NTAQ1	0.825111	Down	0.0111589
Q14653	IRF3	0.825124	Down	0.00119841
O43765	SGTA	0.825178	Down	0.00121002
Q9UKV8	AGO2	0.825191	Down	9.43125e-05
O75896	TUSC2	0.825323	Down	0.0107288
Q66K74	MAP1S	0.825342	Down	0.000101464
Q15386	UBE3C	0.825382	Down	0.00162871
Q5T6V5	C9orf64	0.825443	Down	0.000477652
Q8WUX9	CHMP7	0.825626	Down	0.000143548
O43294	TGFB1I1	0.825689	Down	0.000121782
Q9Y2D5	AKAP2	0.825817	Down	0.000253964
Q9NZN8	CNOT2	0.825897	Down	5.08974e-05
Q16555	DPYSL2	0.826009	Down	0.00817365
Q7Z3J2	VPS35L	0.82612	Down	0.00125441
P29597	TYK2	0.82625	Down	0.0015788
P48454	PPP3CC	0.826257	Down	0.0178176
Q9C035	TRIM5	0.82632	Down	0.00191829
O95757	HSPA4L	0.826383	Down	0.000479183
Q8N8A2	ANKRD44	0.826391	Down	0.00324978
O94830	DDHD2	0.826391	Down	0.00302908
Q8N1W1	ARHGEF28	0.826502	Down	2.9457e-05
Q9H7B4	SMYD3	0.826725	Down	0.000637518
P20042	EIF2S2	0.826769	Down	0.00309734
Q2NKX8	ERCC6L	0.827041	Down	1.35954e-05
Q96BH1	RNF25	0.827213	Down	0.00548288
Q96CV9	OPTN	0.827278	Down	0.000250737
P19525	EIF2AK2	0.827467	Down	0.000605484
P67775	PPP2CA	0.827494	Down	0.000570809
Q9NZI8	IGF2BP1	0.827505	Down	0.00529068
Q7Z4S6	KIF21A	0.827698	Down	0.000132244
Q9NXJ5	PGPEP1	0.827713	Down	0.00167517
P62341	SELENOT	0.827855	Down	0.0422096
P62942	FKBP1A	0.827941	Down	0.000234965
Q8IVD9	NUDCD3	0.828356	Down	0.00210319
Q13043	STK4	0.828469	Down	0.000324738
Q96B54	ZNF428	0.828475	Down	0.0197488
P34896	SHMT1	0.828666	Down	0.00064975
P48426	PIP4K2A	0.828684	Down	7.34843e-06
Q10567	AP1B1	0.828764	Down	0.000177039
Q53H96	PYCR3	0.828843	Down	0.000670106
Q9UBF8	PI4KB	0.829049	Down	0.000578903
Q9UPY8	MAPRE3	0.829187	Down	0.00104562
Q96QK1	VPS35	0.82927	Down	0.000696127
Q8N9F7	GDPD1	0.829352	Down	0.0264014
P61970	NUTF2	0.829538	Down	0.0073017
Q9P2B4	CTTNBP2NL	0.829542	Down	0.000202859
Q86VX2	COMMD7	0.829609	Down	0.000218012
Q9UJT0	TUBE1	0.829632	Down	0.00148919
Q15843	NEDD8	0.829724	Down	0.00538084
Q15653	NFKBIB	0.829774	Down	0.000179618
Q9Y315	DERA	0.829837	Down	0.000451474
Q9BRP8	PYM1	0.83	Down	0.000435266
Q9UK99	FBXO3	0.830071	Down	0.000475013
P50583	NUDT2	0.830173	Down	0.00314162
Q6P996	PDXDC1	0.8302	Down	0.000412324
Q9P265	DIP2B	0.830443	Down	5.8757e-05
Q5JUR7	TEX30	0.830464	Down	0.000896708
P09525	ANXA4	0.830497	Down	0.000816887
Q6V1X1	DPP8	0.830698	Down	0.00860971
P14550	AKR1A1	0.830702	Down	0.00126206
O43237	DYNC1LI2	0.83071	Down	0.000838288
Q9BZE9	ASPSCR1	0.830766	Down	0.00148304
Q9NXD2	MTMR10	0.830779	Down	0.00871049
Q8IWV8	UBR2	0.831105	Down	0.0042167
Q9BQ52	ELAC2	0.831107	Down	0.000736682
Q01968	OCRL	0.831178	Down	0.00161993
Q96CN9	GCC1	0.831282	Down	0.00014048
Q04760	GLO1	0.831507	Down	0.000677298
P61758	VBP1	0.831541	Down	0.00486068
Q6ZW76	ANKS3	0.831543	Down	0.00342321
P11142	HSPA8	0.831547	Down	0.00151326
P49754	VPS41	0.831559	Down	0.0137824
Q9Y6M1	IGF2BP2	0.831776	Down	0.000711286
Q6Y7W6	GIGYF2	0.83178	Down	2.4412e-05
Q9NX01	TXNL4B	0.831789	Down	0.00355742
Q9HC35	EML4	0.831795	Down	8.49866e-05
Q96FQ6	S100A16	0.83221	Down	0.000305725
P55196	AFDN	0.832222	Down	3.48909e-07
Q96CN7	ISOC1	0.832437	Down	0.000380936
Q96S82	UBL7	0.832499	Down	0.000575272
O75179	ANKRD17	0.83276	Down	0.000120723
Q9C0H5	ARHGAP39	0.832778	Down	0.0231486
Q9UPW5	AGTPBP1	0.832826	Down	0.038155
Q15746	MYLK	0.832901	Down	0.000542484
Q9ULH1	ASAP1	0.832934	Down	0.00587161
Q6VY07	PACS1	0.833186	Down	8.77337e-05
Q5VT25	CDC42BPA	0.833213	Down	0.000193706
A0A024RBG1	NUDT4B	0.833217	Down	0.0310923
Q9Y6Q9	NCOA3	1.20028	Up	0.00187338
P43007	SLC1A4	1.2007	Up	0.00229642
P17029	ZKSCAN1	1.20075	Up	0.000981809
Q9BTU6	PI4K2A	1.20087	Up	0.000318483
O43181	NDUFS4	1.20107	Up	0.00114034
O15347	HMGB3	1.20114	Up	0.00198538
Q86X95	CIR1	1.20117	Up	0.000782731
Q9UMN6	KMT2B	1.20131	Up	0.00157554
O15269	SPTLC1	1.20143	Up	0.000155767
Q9UIF9	BAZ2A	1.20144	Up	0.000104763
O95249	GOSR1	1.20158	Up	0.000981778
Q8TF68	ZNF384	1.20182	Up	0.00556709
Q6PI78	TMEM65	1.20193	Up	0.000449046
Q5T7M9	DIPK1A	1.20195	Up	0.0232944
P15289	ARSA	1.20215	Up	3.75254e-05
P02774	GC	1.20218	Up	0.0363629
Q8NDD1	C1orf131	1.20226	Up	0.00574198
Q8N9Z2	CCDC71L	1.20232	Up	0.00776952
Q9UMS0	NFU1	1.20234	Up	0.000755424
Q643R3	LPCAT4	1.20234	Up	0.000845288
Q6P2Q9	PRPF8	1.20239	Up	7.0462e-05
Q9UIG0	BAZ1B	1.20256	Up	0.000248077
O75718	CRTAP	1.20259	Up	0.000778177
Q6ZMZ0	RNF19B	1.20266	Up	0.0233153
Q92665	MRPS31	1.20267	Up	0.000691458
Q96HY7	DHTKD1	1.20305	Up	0.000135336
O95391	SLU7	1.20316	Up	0.00110974
Q9NQG5	RPRD1B	1.20339	Up	0.000774559
Q96EZ8	MCRS1	1.20371	Up	0.00102939
Q96HH6	TMEM19	1.20398	Up	0.000102
Q99496	RNF2	1.20411	Up	0.000814949
P55084	HADHB	1.20422	Up	0.000297716
Q9NWT8	AURKAIP1	1.20424	Up	0.0367889
Q9BUJ2	HNRNPUL1	1.20431	Up	0.000489614
Q7Z2K6	ERMP1	1.20448	Up	0.00309526
O15504	NUP42	1.20454	Up	0.00110247
P18583	SON	1.20456	Up	0.00458475
O95707	POP4	1.20488	Up	0.00466881
Q9H5H4	ZNF768	1.20494	Up	5.27447e-05
O14966	RAB29	1.20503	Up	0.00419087
P51571	SSR4	1.20511	Up	6.17502e-05
Q9NS00	C1GALT1	1.20513	Up	0.00675226
P35914	HMGCL	1.20521	Up	0.00150684
P22570	FDXR	1.20533	Up	7.74772e-05
O75251	NDUFS7	1.20545	Up	0.000124295
Q01650	SLC7A5	1.20547	Up	0.00113605
Q9H0U9	TSPYL1	1.20558	Up	0.000738158
Q15742	NAB2	1.2056	Up	0.00417764
Q9Y2G3	ATP11B	1.20579	Up	0.0160759
Q9P0M6	MACROH2A2	1.20604	Up	0.00634558
Q9UH99	SUN2	1.20631	Up	0.000770835
P15151	PVR	1.20659	Up	0.0025378
Q32P28	P3H1	1.20659	Up	5.58431e-06
Q9NYG2	ZDHHC3	1.20661	Up	0.00149088
P54886	ALDH18A1	1.20661	Up	9.63474e-05
Q16531	DDB1	1.20673	Up	0.000141211
Q9P013	CWC15	1.20708	Up	6.43005e-05
Q9UGQ3	SLC2A6	1.20709	Up	0.012669
Q2TAY7	SMU1	1.20711	Up	0.00101008
Q49A26	GLYR1	1.20715	Up	2.66177e-05
Q10587	TEF	1.20738	Up	0.0432614
Q15070	OXA1L	1.20744	Up	2.70488e-05
Q96DA2	RAB39B	1.20748	Up	0.00348724
P35227	PCGF2	1.20765	Up	0.000293094
P14923	JUP	1.20768	Up	0.00146312
Q9BUL5	PHF23	1.2079	Up	0.000472913
Q14241	ELOA	1.20794	Up	0.000182317
Q9ULF5	SLC39A10	1.20797	Up	0.0053731
Q15035	TRAM2	1.20846	Up	0.00768512
O00257	CBX4	1.20852	Up	0.000218021
Q13503	MED21	1.20881	Up	0.00208679
Q02127	DHODH	1.20896	Up	0.00014139
P33240	CSTF2	1.20922	Up	8.82516e-05
Q9BVP2	GNL3	1.20924	Up	0.000192518
Q8IWA0	WDR75	1.20926	Up	0.00337782
Q08257	CRYZ	1.20941	Up	0.00110845
Q9Y2C4	EXOG	1.20953	Up	0.000548063
O95502	NPTXR	1.20957	Up	0.00073834
Q7Z7K6	CENPV	1.20968	Up	0.00173798
Q96PV6	LENG8	1.20969	Up	0.00177231
Q8WW59	SPRYD4	1.20972	Up	0.000252954
Q9NV31	IMP3	1.2099	Up	0.00194886
Q8WX92	NELFB	1.21031	Up	0.000855207
Q9H845	ACAD9	1.21057	Up	4.45532e-06
P57088	TMEM33	1.21058	Up	0.00058784
Q9H160	ING2	1.21063	Up	0.00113933
Q15907	RAB11B	1.2108	Up	0.000397261
P78310	CXADR	1.21096	Up	0.000222999
Q9H7B2	RPF2	1.21109	Up	0.0013839
Q96LT9	RNPC3	1.21117	Up	0.00183731
Q13523	PRPF4B	1.21118	Up	0.000240989
Q15906	VPS72	1.21131	Up	1.96566e-05
P22033	MMUT	1.21155	Up	5.17907e-05
Q8N3X1	FNBP4	1.21177	Up	0.00049663
Q86WR7	PROSER2	1.21195	Up	0.0104727
Q9NQC3	RTN4	1.21228	Up	0.000607381
Q9Y697	NFS1	1.2124	Up	0.000171936
P53701	HCCS	1.2126	Up	0.000162913
O75438	NDUFB1	1.2127	Up	0.000285576
Q7L014	DDX46	1.21271	Up	0.000135033
Q00978	IRF9	1.2128	Up	0.000142585
P0DJD0	RGPD1	1.21305	Up	0.0020082
P15408	FOSL2	1.21319	Up	0.000143442
P55081	MFAP1	1.21326	Up	0.00161336
P61619	SEC61A1	1.21336	Up	0.000123961
P49959	MRE11	1.21353	Up	4.60208e-05
Q8NC54	KCT2	1.21362	Up	0.0184655
Q9UIS9	MBD1	1.21372	Up	0.0021075
Q5SY16	NOL9	1.21374	Up	0.000104114
Q8WVC0	LEO1	1.2138	Up	0.00826802
Q92618	ZNF516	1.21384	Up	0.0141517
O43462	MBTPS2	1.21403	Up	0.00502352
O43402	EMC8	1.2141	Up	0.0053558
Q92626	PXDN	1.21423	Up	6.46789e-05
Q9NVU7	SDAD1	1.21427	Up	0.000256706
Q9H3Z4	DNAJC5	1.21433	Up	0.00778045
Q16799	RTN1	1.2147	Up	0.00253373
O60783	MRPS14	1.21479	Up	0.00320324
Q96I25	RBM17	1.2148	Up	8.70016e-05
O43920	NDUFS5	1.21493	Up	0.000960971
Q9H6E4	CCDC134	1.21528	Up	0.0102326
Q14966	ZNF638	1.21548	Up	2.49883e-05
Q9H490	PIGU	1.21564	Up	0.00574271
O75643	SNRNP200	1.21572	Up	1.74159e-05
P18031	PTPN1	1.21588	Up	0.000318083
O43660	PLRG1	1.216	Up	1.37859e-06
Q04828	AKR1C1	1.21602	Up	0.033548
Q9HCU5	PREB	1.21603	Up	5.65238e-05
Q9Y227	ENTPD4	1.21629	Up	0.00114447
P80303	NUCB2	1.21637	Up	0.000155159
Q9NRZ7	AGPAT3	1.21638	Up	0.00731918
Q12962	TAF10	1.21642	Up	0.00251948
P28370	SMARCA1	1.21647	Up	0.000376813
P49848	TAF6	1.21648	Up	0.000529354
Q9BPX6	MICU1	1.21648	Up	0.000247067
O43143	DHX15	1.21658	Up	0.000492424
O60499	STX10	1.21662	Up	0.00854131
P67812	SEC11A	1.21682	Up	7.13864e-05
O43169	CYB5B	1.21687	Up	0.0399193
O95299	NDUFA10	1.21688	Up	0.00128966
Q8IXB1	DNAJC10	1.2169	Up	0.000224294
Q96BP2	CHCHD1	1.21705	Up	0.0245905
Q86U86	PBRM1	1.21717	Up	0.000202733
Q9BQ69	MACROD1	1.21742	Up	4.20382e-05
Q9H5K3	POMK	1.21754	Up	0.000544054
Q9NQT8	KIF13B	1.21773	Up	0.0474079
Q8IWX8	CHERP	1.21787	Up	4.47594e-06
Q9ULK4	MED23	1.21789	Up	0.000115267
Q96CP7	TLCD1	1.21803	Up	0.0254939
Q7Z3B4	NUP54	1.21849	Up	0.000508465
P18084	ITGB5	1.21863	Up	4.10903e-05
Q6WKZ4	RAB11FIP1	1.21873	Up	0.000154466
B7ZAP0	RABGAP1L	1.21889	Up	0.00710233
Q96JK2	DCAF5	1.21897	Up	0.00250603
Q06136	KDSR	1.21916	Up	8.71416e-06
Q9NSE4	IARS2	1.2192	Up	0.000100624
Q9BT40	INPP5K	1.21936	Up	1.99982e-05
Q9Y3C7	MED31	1.21972	Up	0.00296729
O75521	ECI2	1.21976	Up	0.000893399
Q92769	HDAC2	1.21985	Up	2.82953e-05
Q9BYC9	MRPL20	1.21989	Up	0.0032605
Q13190	STX5	1.21995	Up	3.64758e-06
Q9P275	USP36	1.22001	Up	0.000816557
Q53GS9	USP39	1.22002	Up	0.000509519
Q9BVG9	PTDSS2	1.22009	Up	8.88373e-05
P08621	SNRNP70	1.22014	Up	0.00010914
Q9H936	SLC25A22	1.22026	Up	0.000505777
P55769	SNU13	1.22037	Up	6.38275e-05
Q13443	ADAM9	1.22044	Up	0.000237345
P51825	AFF1	1.22049	Up	0.00163691
O60437	PPL	1.22057	Up	0.0141322
P22087	FBL	1.22062	Up	0.000372514
P08651	NFIC	1.22063	Up	0.000178566
O60934	NBN	1.2207	Up	0.000457526
Q92610	ZNF592	1.2207	Up	0.0031804
Q9Y320	TMX2	1.2209	Up	2.41973e-05
Q99519	NEU1	1.22097	Up	0.0109653
Q9BRR6	ADPGK	1.22131	Up	0.000273297
P11182	DBT	1.22133	Up	0.000578415
P62995	TRA2B	1.22191	Up	0.0101457
Q02252	ALDH6A1	1.22209	Up	0.000269946
O95674	CDS2	1.22211	Up	0.00301367
O75027	ABCB7	1.22225	Up	5.89692e-05
Q8N1F8	STK11IP	1.22267	Up	0.00284195
Q8WUM0	NUP133	1.22278	Up	0.000286665
Q96KC8	DNAJC1	1.22286	Up	4.43549e-06
Q6P4E1	GOLM2	1.2229	Up	0.00317292
P05023	ATP1A1	1.22306	Up	0.000214381
O15321	TM9SF1	1.22309	Up	9.06638e-05
Q9UBM1	PEMT	1.22327	Up	0.0205516
Q9UHC9	NPC1L1	1.22363	Up	0.00600555
Q8WVK2	SNRNP27	1.22363	Up	0.000531831
O75844	ZMPSTE24	1.22384	Up	0.000993212
Q9P2K5	MYEF2	1.22386	Up	0.000211206
Q9Y2W2	WBP11	1.22388	Up	2.9774e-05
Q9NZM1	MYOF	1.22393	Up	1.74987e-05
Q9BYG3	NIFK	1.22414	Up	0.000797847
P36776	LONP1	1.2242	Up	0.000181107
Q13227	GPS2	1.22434	Up	0.000404536
Q8NF37	LPCAT1	1.22456	Up	0.000428449
Q6WCQ1	MPRIP	1.2246	Up	1.53731e-05
Q86UB9	TMEM135	1.2247	Up	0.0469441
Q9UJ83	HACL1	1.22473	Up	1.3874e-05
P05166	PCCB	1.22474	Up	3.38885e-05
O15440	ABCC5	1.2249	Up	0.00211491
Q9H7F4	TMEM185B	1.22493	Up	0.00799929
Q96E39	RBMXL1	1.22497	Up	0.00313402
P26440	IVD	1.22504	Up	6.63013e-05
Q9H501	ESF1	1.22542	Up	0.000171837
O95864	FADS2	1.22549	Up	0.0160356
Q9NQT5	EXOSC3	1.22552	Up	0.00115875
Q9UQ35	SRRM2	1.22561	Up	0.000123264
Q99459	CDC5L	1.22564	Up	7.28278e-07
Q9Y5J7	TIMM9	1.22579	Up	2.74636e-05
Q96C57	CUSTOS	1.22589	Up	0.00082438
Q12824	SMARCB1	1.22592	Up	5.83885e-05
Q8N3V7	SYNPO	1.22605	Up	0.000165038
Q6PJT7	ZC3H14	1.22606	Up	0.000723405
P09651	HNRNPA1	1.22606	Up	0.000117056
Q02388	COL7A1	1.2268	Up	0.00190396
Q6UW63	POGLUT2	1.22727	Up	5.5418e-05
Q9H3P2	NELFA	1.22759	Up	0.00328727
Q96B77	TMEM186	1.22767	Up	0.000182797
O14732	IMPA2	1.22788	Up	0.000915995
Q96GQ7	DDX27	1.22852	Up	0.000480901
O43818	RRP9	1.22862	Up	0.00049757
Q96IW7	SEC22A	1.22888	Up	0.00236665
Q8N4V1	MMGT1	1.229	Up	0.000731091
O75152	ZC3H11A	1.22956	Up	0.000137256
Q9NVP1	DDX18	1.22964	Up	9.21556e-05
[truncated: 1,279 more rows]
